# Supplementary material for: Identification of a Dexamethasone Mediated Radioprotection Mechanism Reveals New Therapeutic Vulnerabilities in Glioblastoma
Source: MDPI journal article supplement (doi:10.3390/cancers13020361), 2021-01-19
Supplement: s1 [file Table S1 T98G RNAseq data .xlsx]

## Sheet: padj<0,05 gene list GO
HGNC.symbol	FC	log2FoldChange	pvalue	padj	Associated.Gene.Name	GO_Term_ID_BP	GO_Term_Name_BP	GO_Term_ID_MF	GO_Term_Name_MF	GO_Term_ID_CC	GO_Term_Name_CC
SAA1	106.079	6.729	1.12333239367048e-312	0	SAA1	GO:0006898;GO:0050918;GO:0030593;GO:0044267;GO:0050728;GO:0045087;GO:0007186;GO:0006953;GO:0006953;GO:0045785;GO:0045785;GO:0019221;GO:0007204;GO:0007204;GO:0030168;GO:0050708;GO:0050715;GO:0050716;GO:0000187;GO:0048246;GO:0048247;GO:0006953;GO:0006898;GO:0050918;GO:0030593;GO:0044267;GO:0050728;GO:0045087;GO:0007186;GO:0006953;GO:0006953;GO:0045785;GO:0045785;GO:0019221;GO:0007204;GO:0007204;GO:…	receptor-mediated endocytosis;positive chemotaxis;neutrophil chemotaxis;cellular protein metabolic process;negative regulation of inflammatory response;innate immune response;G-protein coupled receptor signaling pathway;acute-phase response;acute-phase response;positive regulation of cell adhesion;positive regulation of cell adhesion;cytokine-mediated signaling pathway;positive regulation of cyto…	GO:0042056;GO:0008201;GO:0001664;GO:0042056;GO:0008201;GO:0001664	chemoattractant activity;heparin binding;G-protein coupled receptor binding;chemoattractant activity;heparin binding;G-protein coupled receptor binding	GO:0005576;GO:0005576;GO:0005615;GO:0005576;GO:0070062;GO:0034364;GO:0071682;GO:0005881;GO:0005576;GO:0034364;GO:0005576;GO:0005576;GO:0005615;GO:0005576;GO:0070062;GO:0034364;GO:0071682;GO:0005881	extracellular region;extracellular region;extracellular space;extracellular region;extracellular exosome;high-density lipoprotein particle;endocytic vesicle lumen;cytoplasmic microtubule;extracellular region;high-density lipoprotein particle;extracellular region;extracellular region;extracellular space;extracellular region;extracellular exosome;high-density lipoprotein particle;endocytic vesicle …
ANKRD1	39.7257	5.312	7.93039e-150	5.02271e-146	ANKRD1	GO:0006366;GO:0045944;GO:0043065;GO:0071356;GO:0071222;GO:0071260;GO:0050714;GO:0071560;GO:0035994;GO:0045214;GO:0055008;GO:0019216;GO:0035914;GO:0071347;GO:0043517;GO:2000279;GO:0000122;GO:0006357;GO:0010976;GO:0035690;GO:0035914;GO:0045445;GO:0071222;GO:0071407;GO:0071456	transcription from RNA polymerase II promoter;positive regulation of transcription from RNA polymerase II promoter;positive regulation of apoptotic process;cellular response to tumor necrosis factor;cellular response to lipopolysaccharide;cellular response to mechanical stimulus;positive regulation of protein secretion;cellular response to transforming growth factor beta stimulus;response to musc…	GO:0005515;GO:0005515;GO:0070412;GO:0001085;GO:0003677;GO:0031432;GO:0042826;GO:0002039;GO:0003714;GO:0001105;GO:0003714;GO:0008134;GO:0031432;GO:0061629	protein binding;protein binding;R-SMAD binding;RNA polymerase II transcription factor binding;DNA binding;titin binding;histone deacetylase binding;p53 binding;transcription corepressor activity;RNA polymerase II transcription coactivator activity;transcription corepressor activity;transcription factor binding;titin binding;RNA polymerase II sequence-specific DNA binding transcription factor bind…	GO:0005634;GO:0005737;GO:0005634;GO:0001650;GO:0005654;GO:0031674;GO:0005829;GO:0031674;GO:0005667;GO:0005737;GO:0030016;GO:0031674	nucleus;cytoplasm;nucleus;fibrillar center;nucleoplasm;I band;cytosol;I band;transcription factor complex;cytoplasm;myofibril;I band
TSC22D3	20.9518	4.389	9.12436e-129	3.85261e-125	TSC22D3	GO:0006355;GO:0006355;GO:0034220;GO:0006355;GO:0070236;GO:0006355;GO:0034220;GO:0006355;GO:0070236;GO:0006355;GO:0034220;GO:0006355;GO:0000122;GO:0006970;GO:0048642;GO:0070236;GO:0070236;GO:0006355;GO:0034220;GO:0006355;GO:0070236;GO:0006355;GO:0006355;GO:0034220;GO:0006355;GO:0070236;GO:0006355;GO:0006355;GO:0006355;GO:0006355;GO:0006355;GO:0006355;GO:0006355;GO:0006355;GO:0006355	regulation of transcription, DNA-templated;regulation of transcription, DNA-templated;ion transmembrane transport;regulation of transcription, DNA-templated;negative regulation of activation-induced cell death of T cells;regulation of transcription, DNA-templated;ion transmembrane transport;regulation of transcription, DNA-templated;negative regulation of activation-induced cell death of T cells;…	GO:0003700;GO:0003700;GO:0000981;GO:0000981;GO:0003700;GO:0003700;GO:0000981;GO:0000981;GO:0003700;GO:0003700;GO:0000981;GO:0000981;GO:0003700;GO:0043426;GO:0003700;GO:0000981;GO:0000981;GO:0003700;GO:0003700;GO:0003700;GO:0000981;GO:0000981;GO:0003700;GO:0003700;GO:0003700;GO:0003700;GO:0003700;GO:0003700;GO:0003700;GO:0003700;GO:0003700;GO:0003700	DNA binding transcription factor activity;DNA binding transcription factor activity;RNA polymerase II transcription factor activity, sequence-specific DNA binding;RNA polymerase II transcription factor activity, sequence-specific DNA binding;DNA binding transcription factor activity;DNA binding transcription factor activity;RNA polymerase II transcription factor activity, sequence-specific DNA bi…	GO:0005634;GO:0005737;GO:0005634;GO:0005737;GO:0005829;GO:0005634;GO:0005737;GO:0005634;GO:0005737;GO:0005829;GO:0005634;GO:0005737;GO:0005634;GO:0005737;GO:0005829;GO:0005634;GO:0005737;GO:0005634;GO:0005737;GO:0005829;GO:0005634;GO:0005737;GO:0005634;GO:0005737;GO:0005829	nucleus;cytoplasm;nucleus;cytoplasm;cytosol;nucleus;cytoplasm;nucleus;cytoplasm;cytosol;nucleus;cytoplasm;nucleus;cytoplasm;cytosol;nucleus;cytoplasm;nucleus;cytoplasm;cytosol;nucleus;cytoplasm;nucleus;cytoplasm;cytosol
GGT5	9.72703	3.282	2.3179e-115	7.34022e-112	GGT5	GO:0006751;GO:0006508;GO:0006508;GO:0006751;GO:0019370;GO:1901750;GO:1901750;GO:0006749;GO:0006520;GO:0006691;GO:0006631;GO:0006412;GO:0006750;GO:0006751;GO:0006508;GO:0006508;GO:0006751;GO:0019370;GO:1901750;GO:1901750;GO:0006749;GO:0006520;GO:0006691;GO:0006631;GO:0006412;GO:0006750;GO:0006751;GO:0006508;GO:0006751;GO:0006508;GO:0006508;GO:0006751;GO:0019370;GO:1901750;GO:1901750;GO:0006749;GO:…	glutathione catabolic process;proteolysis;proteolysis;glutathione catabolic process;leukotriene biosynthetic process;leukotriene D4 biosynthetic process;leukotriene D4 biosynthetic process;glutathione metabolic process;cellular amino acid metabolic process;leukotriene metabolic process;fatty acid metabolic process;translation;glutathione biosynthetic process;glutathione catabolic process;proteoly…	GO:0036374;GO:0016740;GO:0016787;GO:0016746;GO:0008233;GO:0000048;GO:0002951;GO:0036374;GO:0036374;GO:0102953;GO:0103068;GO:0036374;GO:0016740;GO:0016787;GO:0016746;GO:0008233;GO:0000048;GO:0002951;GO:0036374;GO:0036374;GO:0102953;GO:0103068;GO:0036374;GO:0036374;GO:0016740;GO:0016787;GO:0016746;GO:0008233;GO:0000048;GO:0002951;GO:0036374;GO:0036374;GO:0102953;GO:0103068;GO:0036374	glutathione hydrolase activity;transferase activity;hydrolase activity;transferase activity, transferring acyl groups;peptidase activity;peptidyltransferase activity;leukotriene-C(4) hydrolase;glutathione hydrolase activity;glutathione hydrolase activity;hypoglycin A gamma-glutamyl transpeptidase activity;leukotriene C4 gamma-glutamyl transferase activity;glutathione hydrolase activity;transferas…	GO:0016020;GO:0016021;GO:0005886;GO:0031226;GO:0016020;GO:0016021;GO:0005886;GO:0031226;GO:0016020;GO:0016021;GO:0005886;GO:0031226;GO:0005886	membrane;integral component of membrane;plasma membrane;intrinsic component of plasma membrane;membrane;integral component of membrane;plasma membrane;intrinsic component of plasma membrane;membrane;integral component of membrane;plasma membrane;intrinsic component of plasma membrane;plasma membrane
SCNN1A	31.6251	4.983	2.20171e-112	5.57782e-109	SCNN1A	GO:0006814;GO:0006811;GO:0050896;GO:0050909;GO:0034220;GO:0035725;GO:0050891;GO:0055078;GO:0006814;GO:0006811;GO:0035725;GO:0006814;GO:0006811;GO:0050896;GO:0050909;GO:0034220;GO:0035725;GO:0050891;GO:0055078;GO:0006814;GO:0006811;GO:0035725;GO:0006811;GO:0006814;GO:0035725;GO:0006814;GO:0006811;GO:0050896;GO:0050909;GO:0034220;GO:0035725;GO:0050891;GO:0055078;GO:0006814;GO:0006811;GO:0035725	sodium ion transport;ion transport;response to stimulus;sensory perception of taste;ion transmembrane transport;sodium ion transmembrane transport;multicellular organismal water homeostasis;sodium ion homeostasis;sodium ion transport;ion transport;sodium ion transmembrane transport;sodium ion transport;ion transport;response to stimulus;sensory perception of taste;ion transmembrane transport;sodi…	GO:0005272;GO:0015280;GO:0005515;GO:0050699;GO:0015280;GO:0005272;GO:0015280;GO:0005272;GO:0015280;GO:0005515;GO:0050699;GO:0015280;GO:0005272;GO:0015280;GO:0005272;GO:0005272;GO:0015280;GO:0005515;GO:0050699;GO:0015280;GO:0005272	sodium channel activity;ligand-gated sodium channel activity;protein binding;WW domain binding;ligand-gated sodium channel activity;sodium channel activity;ligand-gated sodium channel activity;sodium channel activity;ligand-gated sodium channel activity;protein binding;WW domain binding;ligand-gated sodium channel activity;sodium channel activity;ligand-gated sodium channel activity;sodium channe…	GO:0016021;GO:0016020;GO:0005737;GO:0005737;GO:0031514;GO:0005886;GO:0042995;GO:0005886;GO:0005887;GO:0005929;GO:0070062;GO:0001669;GO:0060170;GO:0016324;GO:0016324;GO:0034706;GO:0097228;GO:0016021;GO:0016020;GO:0016021;GO:0016020;GO:0005737;GO:0005737;GO:0031514;GO:0005886;GO:0042995;GO:0005886;GO:0005887;GO:0005929;GO:0070062;GO:0001669;GO:0060170;GO:0016324;GO:0016324;GO:0034706;GO:0097228;GO:…	integral component of membrane;membrane;cytoplasm;cytoplasm;motile cilium;plasma membrane;cell projection;plasma membrane;integral component of plasma membrane;cilium;extracellular exosome;acrosomal vesicle;ciliary membrane;apical plasma membrane;apical plasma membrane;sodium channel complex;sperm principal piece;integral component of membrane;membrane;integral component of membrane;membrane;cyto…
ITGA10	26.8156	4.745	2.01607e-88	4.25627e-85	ITGA10	GO:0007155;GO:0007229;GO:0007229;GO:0030198;GO:0007160;GO:0007160;GO:0007155;GO:0007229;GO:0007229;GO:0030198;GO:0007160;GO:0007160	cell adhesion;integrin-mediated signaling pathway;integrin-mediated signaling pathway;extracellular matrix organization;cell-matrix adhesion;cell-matrix adhesion;cell adhesion;integrin-mediated signaling pathway;integrin-mediated signaling pathway;extracellular matrix organization;cell-matrix adhesion;cell-matrix adhesion	GO:0046872;GO:0005518;GO:0098639;GO:0046872;GO:0005518;GO:0098639	metal ion binding;collagen binding;collagen binding involved in cell-matrix adhesion;metal ion binding;collagen binding;collagen binding involved in cell-matrix adhesion	GO:0008305;GO:0016020;GO:0016021;GO:0005886;GO:0008305;GO:0034680;GO:0008305;GO:0016020;GO:0016021;GO:0005886;GO:0008305;GO:0034680	integrin complex;membrane;integral component of membrane;plasma membrane;integrin complex;integrin alpha10-beta1 complex;integrin complex;membrane;integral component of membrane;plasma membrane;integrin complex;integrin alpha10-beta1 complex
FKBP5	7.20002	2.848	9.51616e-77	1.72202e-73	FKBP5	GO:0000413;GO:0061077;GO:0006457;GO:0000413;GO:0061077;GO:0006457;GO:0000413;GO:0061077;GO:0006457;GO:0000413;GO:0061077;GO:0006457	protein peptidyl-prolyl isomerization;chaperone-mediated protein folding;protein folding;protein peptidyl-prolyl isomerization;chaperone-mediated protein folding;protein folding;protein peptidyl-prolyl isomerization;chaperone-mediated protein folding;protein folding;protein peptidyl-prolyl isomerization;chaperone-mediated protein folding;protein folding	GO:0005515;GO:0031072;GO:0003755;GO:0005528;GO:0016853;GO:0003755;GO:0005515;GO:0005528;GO:0031072;GO:0005528;GO:0005515;GO:0031072;GO:0003755;GO:0005528;GO:0016853;GO:0003755;GO:0005515;GO:0005528;GO:0031072;GO:0005528;GO:0005515;GO:0031072;GO:0003755;GO:0005528;GO:0016853;GO:0003755;GO:0005515;GO:0005528;GO:0031072;GO:0005528;GO:0031072;GO:0003755;GO:0005528;GO:0016853;GO:0003755;GO:0005515;GO:…	protein binding;heat shock protein binding;peptidyl-prolyl cis-trans isomerase activity;FK506 binding;isomerase activity;peptidyl-prolyl cis-trans isomerase activity;protein binding;FK506 binding;heat shock protein binding;FK506 binding;protein binding;heat shock protein binding;peptidyl-prolyl cis-trans isomerase activity;FK506 binding;isomerase activity;peptidyl-prolyl cis-trans isomerase activ…	GO:0005634;GO:0005737;GO:0016020;GO:0005654;GO:0005737;GO:0005829;GO:0070062;GO:0005634;GO:0005737;GO:0016020;GO:0005654;GO:0005737;GO:0005829;GO:0070062;GO:0005634;GO:0005737;GO:0016020;GO:0005654;GO:0005737;GO:0005829;GO:0070062;GO:0005634;GO:0005737;GO:0016020;GO:0005654;GO:0005737;GO:0005829;GO:0070062	nucleus;cytoplasm;membrane;nucleoplasm;cytoplasm;cytosol;extracellular exosome;nucleus;cytoplasm;membrane;nucleoplasm;cytoplasm;cytosol;extracellular exosome;nucleus;cytoplasm;membrane;nucleoplasm;cytoplasm;cytosol;extracellular exosome;nucleus;cytoplasm;membrane;nucleoplasm;cytoplasm;cytosol;extracellular exosome
NPR3	12.6319	3.659	9.41986e-76	1.49152e-72	NPR3	GO:0001501;GO:0008217;GO:0051000;GO:0035810;GO:0001501;GO:0002158;GO:0002158;GO:0007193;GO:0007194;GO:0007200;GO:0008217;GO:0030157;GO:0033688;GO:0033688;GO:0035810;GO:0048015;GO:0048662;GO:0051000;GO:0001501;GO:0008217;GO:0051000;GO:0035810;GO:0002158;GO:0033688;GO:0001501;GO:0008217;GO:0051000;GO:0035810;GO:0002158;GO:0033688	skeletal system development;regulation of blood pressure;positive regulation of nitric-oxide synthase activity;positive regulation of urine volume;skeletal system development;osteoclast proliferation;osteoclast proliferation;adenylate cyclase-inhibiting G-protein coupled receptor signaling pathway;negative regulation of adenylate cyclase activity;phospholipase C-activating G-protein coupled recep…	GO:0005515;GO:0042803;GO:0017046;GO:0017046;GO:0016941;GO:0031404;GO:0008528;GO:0008528;GO:0016941;GO:0017046;GO:0042277;GO:0042562;GO:0042803;GO:0005515;GO:0042803;GO:0017046;GO:0017046;GO:0016941;GO:0031404;GO:0008528;GO:0042277;GO:0042562;GO:0005515;GO:0042803;GO:0017046;GO:0017046;GO:0016941;GO:0031404;GO:0008528;GO:0042277;GO:0042562	protein binding;protein homodimerization activity;peptide hormone binding;peptide hormone binding;natriuretic peptide receptor activity;chloride ion binding;G-protein coupled peptide receptor activity;G-protein coupled peptide receptor activity;natriuretic peptide receptor activity;peptide hormone binding;peptide binding;hormone binding;protein homodimerization activity;protein binding;protein ho…	GO:0016021;GO:0016020;GO:0016021;GO:0016020;GO:0016021;GO:0016020;GO:0005622;GO:0070062;GO:0032991;GO:0005887;GO:0016021;GO:0016020;GO:0005622;GO:0070062;GO:0032991;GO:0005887;GO:0016021;GO:0016020;GO:0005622;GO:0070062;GO:0032991;GO:0005887	integral component of membrane;membrane;integral component of membrane;membrane;integral component of membrane;membrane;intracellular;extracellular exosome;macromolecular complex;integral component of plasma membrane;integral component of membrane;membrane;intracellular;extracellular exosome;macromolecular complex;integral component of plasma membrane;integral component of membrane;membrane;intra…
SYTL2	0.124481	-3.006	2.33844e-75	3.29122e-72	SYTL2	GO:0006887;GO:0006887;GO:0006886;GO:0006887;GO:0016192;GO:0006906;GO:0006887;GO:0006904;GO:0010923;GO:0070257;GO:0072659;GO:0006887;GO:0006886;GO:0016192;GO:0006906;GO:0006887;GO:0006904;GO:0010923;GO:0006887;GO:0006887;GO:0006886;GO:0016192;GO:0006906;GO:0006887;GO:0006904;GO:0010923;GO:0006887;GO:0006886;GO:0016192;GO:0006906;GO:0006887;GO:0006904;GO:0010923;GO:0006887;GO:0006886;GO:0006887;GO:…	exocytosis;exocytosis;intracellular protein transport;exocytosis;vesicle-mediated transport;vesicle fusion;exocytosis;vesicle docking involved in exocytosis;negative regulation of phosphatase activity;positive regulation of mucus secretion;protein localization to plasma membrane;exocytosis;intracellular protein transport;vesicle-mediated transport;vesicle fusion;exocytosis;vesicle docking involve…	GO:0017137;GO:0017137;GO:0017137;GO:0005515;GO:0005509;GO:0005544;GO:0019905;GO:0030276;GO:0019902;GO:0005546;GO:0001786;GO:0042043;GO:0042043;GO:0017137;GO:0005515;GO:0005509;GO:0005544;GO:0019905;GO:0030276;GO:0019902;GO:0005546;GO:0001786;GO:0042043;GO:0017137;GO:0017137;GO:0005515;GO:0005509;GO:0005544;GO:0019905;GO:0030276;GO:0019902;GO:0005546;GO:0001786;GO:0042043;GO:0017137;GO:0005515;GO:…	Rab GTPase binding;Rab GTPase binding;Rab GTPase binding;protein binding;calcium ion binding;calcium-dependent phospholipid binding;syntaxin binding;clathrin binding;phosphatase binding;phosphatidylinositol-4,5-bisphosphate binding;phosphatidylserine binding;neurexin family protein binding;neurexin family protein binding;Rab GTPase binding;protein binding;calcium ion binding;calcium-dependent pho…	GO:0005737;GO:0005737;GO:0016020;GO:0016020;GO:0005886;GO:0005886;GO:0042470;GO:0070382;GO:0019897;GO:0019897;GO:0042470;GO:0005737;GO:0005737;GO:0016020;GO:0016020;GO:0005886;GO:0005886;GO:0042470;GO:0070382;GO:0019897;GO:0005737;GO:0005737;GO:0016020;GO:0016020;GO:0005886;GO:0005886;GO:0042470;GO:0070382;GO:0019897;GO:0005737;GO:0005737;GO:0016020;GO:0016020;GO:0005886;GO:0005886;GO:0042470;GO:…	cytoplasm;cytoplasm;membrane;membrane;plasma membrane;plasma membrane;melanosome;exocytic vesicle;extrinsic component of plasma membrane;extrinsic component of plasma membrane;melanosome;cytoplasm;cytoplasm;membrane;membrane;plasma membrane;plasma membrane;melanosome;exocytic vesicle;extrinsic component of plasma membrane;cytoplasm;cytoplasm;membrane;membrane;plasma membrane;plasma membrane;melan…
SAA2-SAA4	63.1189	5.98	3.37035e-70	4.26922e-67	SAA2-SAA4	GO:0050918;GO:0060326	positive chemotaxis;cell chemotaxis	GO:0042056	chemoattractant activity	GO:0005576;GO:0005615	extracellular region;extracellular space
MYBPC1	65.1187	6.025	9.99006e-70	1.1504e-66	MYBPC1	GO:0007155;GO:0006941;GO:0007015;GO:0045214;GO:0071688;GO:1903955;GO:0030049;GO:0007155;GO:0006941;GO:0007015;GO:0045214;GO:0071688;GO:1903955;GO:0030049;GO:0006936;GO:0007155;GO:0006941;GO:0007015;GO:0045214;GO:0071688;GO:1903955;GO:0030049;GO:0007155;GO:0006941;GO:0007015;GO:0045214;GO:0071688;GO:1903955;GO:0030049;GO:0007155;GO:0006941;GO:0007015;GO:0045214;GO:0071688;GO:1903955;GO:0030049;GO:…	cell adhesion;striated muscle contraction;actin filament organization;sarcomere organization;striated muscle myosin thick filament assembly;positive regulation of protein targeting to mitochondrion;muscle filament sliding;cell adhesion;striated muscle contraction;actin filament organization;sarcomere organization;striated muscle myosin thick filament assembly;positive regulation of protein target…	GO:0005515;GO:0003779;GO:0005515;GO:0051015;GO:0051371;GO:0097493;GO:0008307;GO:0031432;GO:0005515;GO:0003779;GO:0005515;GO:0051015;GO:0051371;GO:0097493;GO:0008307;GO:0031432;GO:0005515;GO:0003779;GO:0005515;GO:0051015;GO:0051371;GO:0097493;GO:0008307;GO:0031432;GO:0005515;GO:0005515;GO:0003779;GO:0005515;GO:0051015;GO:0051371;GO:0097493;GO:0008307;GO:0031432;GO:0005515;GO:0005515;GO:0003779;GO:…	protein binding;actin binding;protein binding;actin filament binding;muscle alpha-actinin binding;structural molecule activity conferring elasticity;structural constituent of muscle;titin binding;protein binding;actin binding;protein binding;actin filament binding;muscle alpha-actinin binding;structural molecule activity conferring elasticity;structural constituent of muscle;titin binding;protein…	GO:0005829;GO:0005859;GO:0030018;GO:0031430;GO:0032982;GO:0030016;GO:0005829;GO:0005859;GO:0030018;GO:0031430;GO:0032982;GO:0030016;GO:0005829;GO:0005859;GO:0030018;GO:0031430;GO:0032982;GO:0030016;GO:0005829;GO:0005859;GO:0030018;GO:0031430;GO:0032982;GO:0030016;GO:0005829;GO:0005859;GO:0030018;GO:0031430;GO:0032982;GO:0030016;GO:0005829;GO:0005859;GO:0030018;GO:0031430;GO:0032982;GO:0030016;GO:…	cytosol;muscle myosin complex;Z disc;M band;myosin filament;myofibril;cytosol;muscle myosin complex;Z disc;M band;myosin filament;myofibril;cytosol;muscle myosin complex;Z disc;M band;myosin filament;myofibril;cytosol;muscle myosin complex;Z disc;M band;myosin filament;myofibril;cytosol;muscle myosin complex;Z disc;M band;myosin filament;myofibril;cytosol;muscle myosin complex;Z disc;M band;myosi…
PER1	5.95871	2.575	2.22182e-59	2.34531e-56	PER1	GO:0006351;GO:0006355;GO:0007623;GO:0048511;GO:0045944;GO:0043967;GO:0000122;GO:0045892;GO:0046329;GO:0007623;GO:0032922;GO:0042634;GO:2000323;GO:0043124;GO:0042752;GO:0070932;GO:0097167;GO:0000122;GO:0002028;GO:0002028;GO:0007623;GO:0009416;GO:0009649;GO:0010608;GO:0010608;GO:0032922;GO:0042752;GO:0043153;GO:0043153;GO:0043966;GO:0043966;GO:0045892;GO:0045944;GO:0051591;GO:0070932;GO:0097167;GO:…	transcription, DNA-templated;regulation of transcription, DNA-templated;circadian rhythm;rhythmic process;positive regulation of transcription from RNA polymerase II promoter;histone H4 acetylation;negative regulation of transcription from RNA polymerase II promoter;negative regulation of transcription, DNA-templated;negative regulation of JNK cascade;circadian rhythm;circadian regulation of gene…	GO:0005515;GO:0031490;GO:0005515;GO:0031625;GO:0070888;GO:0000989;GO:0000978;GO:0000976;GO:0000989;GO:0008134;GO:0019900;GO:0019900;GO:0031490;GO:0005515;GO:0005515;GO:0031490;GO:0005515;GO:0031625;GO:0070888;GO:0000989;GO:0000978;GO:0019900;GO:0005515	protein binding;chromatin DNA binding;protein binding;ubiquitin protein ligase binding;E-box binding;transcription factor activity, transcription factor binding;RNA polymerase II proximal promoter sequence-specific DNA binding;transcription regulatory region sequence-specific DNA binding;transcription factor activity, transcription factor binding;transcription factor binding;kinase binding;kinase…	GO:0005634;GO:0005737;GO:0005737;GO:0005829;GO:0005654;GO:0005829;GO:0005654;GO:0005634;GO:0005737;GO:0005737;GO:0005829;GO:0005654;GO:0005829;GO:0005654;GO:0005829;GO:0005654	nucleus;cytoplasm;cytoplasm;cytosol;nucleoplasm;cytosol;nucleoplasm;nucleus;cytoplasm;cytoplasm;cytosol;nucleoplasm;cytosol;nucleoplasm;cytosol;nucleoplasm
TRNP1	8.77866	3.134	6.23774e-56	6.07795e-53	TRNP1	GO:0006351;GO:0006355;GO:0007049;GO:0007275;GO:0007399;GO:0042127;GO:0051726;GO:0021696;GO:0061351;GO:0021696;GO:0042127;GO:0051726;GO:0061351	transcription, DNA-templated;regulation of transcription, DNA-templated;cell cycle;multicellular organism development;nervous system development;regulation of cell proliferation;regulation of cell cycle;cerebellar cortex morphogenesis;neural precursor cell proliferation;cerebellar cortex morphogenesis;regulation of cell proliferation;regulation of cell cycle;neural precursor cell proliferation	GO:0003677;GO:0003677	DNA binding;DNA binding	GO:0005634;GO:0005634;GO:0005634;GO:0005719;GO:0005719	nucleus;nucleus;nucleus;nuclear euchromatin;nuclear euchromatin
GCNT1	6.34667	2.666	2.78504e-53	2.51986e-50	GCNT1	GO:0006486;GO:0016266;GO:0009101;GO:0050901;GO:0060352;GO:0006486;GO:0016266;GO:0009101;GO:0050901;GO:0060352;GO:0006486;GO:0016266;GO:0009101;GO:0050901;GO:0032868;GO:0048729;GO:0060352;GO:0060993	protein glycosylation;O-glycan processing;glycoprotein biosynthetic process;leukocyte tethering or rolling;cell adhesion molecule production;protein glycosylation;O-glycan processing;glycoprotein biosynthetic process;leukocyte tethering or rolling;cell adhesion molecule production;protein glycosylation;O-glycan processing;glycoprotein biosynthetic process;leukocyte tethering or rolling;response t…	GO:0008375;GO:0016740;GO:0016757;GO:0005515;GO:0003829;GO:0003829;GO:0008375;GO:0016740;GO:0016757;GO:0005515;GO:0003829;GO:0003829;GO:0008375;GO:0016740;GO:0016757;GO:0005515;GO:0003829;GO:0003829	acetylglucosaminyltransferase activity;transferase activity;transferase activity, transferring glycosyl groups;protein binding;beta-1,3-galactosyl-O-glycosyl-glycoprotein beta-1,6-N-acetylglucosaminyltransferase activity;beta-1,3-galactosyl-O-glycosyl-glycoprotein beta-1,6-N-acetylglucosaminyltransferase activity;acetylglucosaminyltransferase activity;transferase activity;transferase activity, tr…	GO:0016020;GO:0016021;GO:0005794;GO:0000139;GO:0005802;GO:0016021;GO:0000139;GO:0031985;GO:0016020;GO:0016021;GO:0005794;GO:0000139;GO:0005802;GO:0016021;GO:0000139;GO:0031985;GO:0016020;GO:0016021;GO:0005794;GO:0000139;GO:0005802;GO:0016021;GO:0000139;GO:0031985;GO:0005615	membrane;integral component of membrane;Golgi apparatus;Golgi membrane;trans-Golgi network;integral component of membrane;Golgi membrane;Golgi cisterna;membrane;integral component of membrane;Golgi apparatus;Golgi membrane;trans-Golgi network;integral component of membrane;Golgi membrane;Golgi cisterna;membrane;integral component of membrane;Golgi apparatus;Golgi membrane;trans-Golgi network;inte…
ERRFI1	4.17275	2.061	1.6203e-52	1.36829e-49	ERRFI1	GO:0043547;GO:0007175;GO:0032691;GO:0032869;GO:0032966;GO:0036120;GO:0042059;GO:0042536;GO:0043589;GO:0045616;GO:0048286;GO:0050732;GO:0060426;GO:0060428;GO:0061469;GO:0070373;GO:0071364;GO:0071474;GO:0071549;GO:1903243;GO:0048286;GO:0060426;GO:0045616;GO:0007175;GO:0007175;GO:0043589;GO:0060428;GO:0031953;GO:0045616	positive regulation of GTPase activity;negative regulation of epidermal growth factor-activated receptor activity;negative regulation of interleukin-1 beta production;cellular response to insulin stimulus;negative regulation of collagen biosynthetic process;cellular response to platelet-derived growth factor stimulus;negative regulation of epidermal growth factor receptor signaling pathway;negati…	GO:0005515;GO:0019901;GO:0017124;GO:0019900;GO:0031267;GO:0005096	protein binding;protein kinase binding;SH3 domain binding;kinase binding;small GTPase binding;GTPase activator activity	GO:0005634;GO:0005737;GO:0005737;GO:0016020;GO:0005829;GO:0005886;GO:0031234;GO:0005829;GO:0031234;GO:0005737;GO:0031234	nucleus;cytoplasm;cytoplasm;membrane;cytosol;plasma membrane;extrinsic component of cytoplasmic side of plasma membrane;cytosol;extrinsic component of cytoplasmic side of plasma membrane;cytoplasm;extrinsic component of cytoplasmic side of plasma membrane
DNAJC15	6.42635	2.684	1.2036e-51	9.52876e-49	DNAJC15	GO:0015031	protein transport	GO:0005515	protein binding	GO:0016020;GO:0016021;GO:0005743;GO:0005739	membrane;integral component of membrane;mitochondrial inner membrane;mitochondrion
EFEMP1	15.0846	3.915	1.75337e-49	1.30647e-46	EFEMP1	GO:0007173;GO:0006355;GO:0010469;GO:0007601;GO:0007173;GO:0018108;GO:0043010;GO:0048048;GO:0048050;GO:0032331;GO:0007173;GO:0007173;GO:0006355;GO:0010469;GO:0007601;GO:0007173;GO:0018108;GO:0043010;GO:0048048;GO:0048050;GO:0032331;GO:0007173;GO:0007173;GO:0007173;GO:0007173;GO:0007173;GO:0007173;GO:0007173	epidermal growth factor receptor signaling pathway;regulation of transcription, DNA-templated;regulation of receptor activity;visual perception;epidermal growth factor receptor signaling pathway;peptidyl-tyrosine phosphorylation;camera-type eye development;embryonic eye morphogenesis;post-embryonic eye morphogenesis;negative regulation of chondrocyte differentiation;epidermal growth factor recept…	GO:0005509;GO:0005006;GO:0008083;GO:0005515;GO:0005154;GO:0005006;GO:0005006;GO:0005509;GO:0005006;GO:0008083;GO:0005515;GO:0005154;GO:0005006;GO:0005509;GO:0005006;GO:0005509;GO:0005006;GO:0005509;GO:0005006;GO:0005509;GO:0005006;GO:0005509;GO:0005006;GO:0005006;GO:0005006	calcium ion binding;epidermal growth factor-activated receptor activity;growth factor activity;protein binding;epidermal growth factor receptor binding;epidermal growth factor-activated receptor activity;epidermal growth factor-activated receptor activity;calcium ion binding;epidermal growth factor-activated receptor activity;growth factor activity;protein binding;epidermal growth factor receptor…	GO:0031012;GO:0005576;GO:0005578;GO:0005615;GO:0005615;GO:0005615;GO:0005576;GO:0070062;GO:0031012;GO:0005578;GO:0005576;GO:0031012;GO:0031012;GO:0005576;GO:0005578;GO:0005615;GO:0005615;GO:0005615;GO:0005576;GO:0070062;GO:0031012;GO:0005578;GO:0005576;GO:0031012;GO:0031012;GO:0031012;GO:0031012;GO:0031012;GO:0031012;GO:0031012	extracellular matrix;extracellular region;proteinaceous extracellular matrix;extracellular space;extracellular space;extracellular space;extracellular region;extracellular exosome;extracellular matrix;proteinaceous extracellular matrix;extracellular region;extracellular matrix;extracellular matrix;extracellular region;proteinaceous extracellular matrix;extracellular space;extracellular space;extr…
MMP3	0.0488669	-4.355	7.62763e-46	5.36773e-43	MMP3	GO:0006508;GO:0006508;GO:0032461;GO:0030574;GO:0019221;GO:0022617;GO:0030574;GO:0006508;GO:0010727;GO:0071732;GO:1903209;GO:0006508;GO:0006508	proteolysis;proteolysis;positive regulation of protein oligomerization;collagen catabolic process;cytokine-mediated signaling pathway;extracellular matrix disassembly;collagen catabolic process;proteolysis;negative regulation of hydrogen peroxide metabolic process;cellular response to nitric oxide;positive regulation of oxidative stress-induced cell death;proteolysis;proteolysis	GO:0008270;GO:0004222;GO:0008237;GO:0046872;GO:0016787;GO:0005515;GO:0008233;GO:0008237;GO:0004252;GO:0004222;GO:0004175;GO:0046872;GO:0016787;GO:0008233;GO:0008237;GO:0046872;GO:0016787;GO:0008233;GO:0008237	zinc ion binding;metalloendopeptidase activity;metallopeptidase activity;metal ion binding;hydrolase activity;protein binding;peptidase activity;metallopeptidase activity;serine-type endopeptidase activity;metalloendopeptidase activity;endopeptidase activity;metal ion binding;hydrolase activity;peptidase activity;metallopeptidase activity;metal ion binding;hydrolase activity;peptidase activity;me…	GO:0031012;GO:0005576;GO:0005578;GO:0005576;GO:0005615	extracellular matrix;extracellular region;proteinaceous extracellular matrix;extracellular region;extracellular space
DUSP1	6.85901	2.778	1.38297e-44	9.22002e-42	DUSP1	GO:0006470;GO:0016311;GO:0007049;GO:0035335;GO:0006979;GO:0042981;GO:0035970;GO:0043407;GO:0043409;GO:0000188;GO:0001706;GO:0009416;GO:0010033;GO:0032355;GO:0032526;GO:0032870;GO:0033574;GO:0035556;GO:0042542;GO:0043065;GO:0043066;GO:0051384;GO:0051447;GO:0051591;GO:0051592;GO:0070373;GO:0071850;GO:0090266;GO:2000279	protein dephosphorylation;dephosphorylation;cell cycle;peptidyl-tyrosine dephosphorylation;response to oxidative stress;regulation of apoptotic process;peptidyl-threonine dephosphorylation;negative regulation of MAP kinase activity;negative regulation of MAPK cascade;inactivation of MAPK activity;endoderm formation;response to light stimulus;response to organic substance;response to estradiol;res…	GO:0016791;GO:0004725;GO:0008138;GO:0017017;GO:0016787;GO:0004721;GO:0005515;GO:0008138;GO:0004726;GO:0008330;GO:0017017;GO:0019838	phosphatase activity;protein tyrosine phosphatase activity;protein tyrosine/serine/threonine phosphatase activity;MAP kinase tyrosine/serine/threonine phosphatase activity;hydrolase activity;phosphoprotein phosphatase activity;protein binding;protein tyrosine/serine/threonine phosphatase activity;non-membrane spanning protein tyrosine phosphatase activity;protein tyrosine/threonine phosphatase ac…	GO:0005634;GO:0005634;GO:0005737	nucleus;nucleus;cytoplasm
PTGER4	9.74053	3.284	4.48607e-44	2.84125e-41	PTGER4	GO:0007186;GO:0007165;GO:0006955;GO:0060348;GO:0050728;GO:0007186;GO:0071260;GO:0070371;GO:0050729;GO:0007254;GO:0050710;GO:0051492;GO:0050715;GO:0007188;GO:0042093;GO:0009612;GO:0030278;GO:0032496;GO:0033624;GO:0042093;GO:0050710;GO:0050715;GO:0050728;GO:0050729;GO:0051492;GO:0071260;GO:0071380;GO:2000420	G-protein coupled receptor signaling pathway;signal transduction;immune response;bone development;negative regulation of inflammatory response;G-protein coupled receptor signaling pathway;cellular response to mechanical stimulus;ERK1 and ERK2 cascade;positive regulation of inflammatory response;JNK cascade;negative regulation of cytokine secretion;regulation of stress fiber assembly;positive regu…	GO:0004957;GO:0004930;GO:0004955;GO:0004871;GO:0005515;GO:0004957	prostaglandin E receptor activity;G-protein coupled receptor activity;prostaglandin receptor activity;signal transducer activity;protein binding;prostaglandin E receptor activity	GO:0016021;GO:0016020;GO:0016021;GO:0005622;GO:0005886;GO:0005886	integral component of membrane;membrane;integral component of membrane;intracellular;plasma membrane;plasma membrane
SUSD2	3.9204	1.971	5.58088e-43	3.36633e-40	SUSD2	GO:0006955;GO:0006898;GO:0051782;GO:1902807	immune response;receptor-mediated endocytosis;negative regulation of cell division;negative regulation of cell cycle G1/S phase transition	GO:0005044;GO:0030247;GO:0005515	scavenger receptor activity;polysaccharide binding;protein binding	GO:0016020;GO:0016021;GO:0005886;GO:0005886;GO:0070062	membrane;integral component of membrane;plasma membrane;plasma membrane;extracellular exosome
EPSTI1	4.65893	2.22	1.19985e-42	6.90842e-40	EPSTI1	NA	NA	NA	NA	NA	NA
IGFBP4	4.04181	2.015	2.60986e-42	1.43735e-39	IGFBP4	GO:0001558;GO:0006954;GO:0010906;GO:0040008;GO:0043410;GO:0043568;GO:0044342;GO:0044267;GO:0043687;GO:0006259;GO:0007165;GO:0001501;GO:0008283;GO:0090090;GO:0043567	regulation of cell growth;inflammatory response;regulation of glucose metabolic process;regulation of growth;positive regulation of MAPK cascade;positive regulation of insulin-like growth factor receptor signaling pathway;type B pancreatic cell proliferation;cellular protein metabolic process;post-translational protein modification;DNA metabolic process;signal transduction;skeletal system develop…	GO:0005520;GO:0005515;GO:0019838;GO:0005102;GO:0031995;GO:0031994	insulin-like growth factor binding;protein binding;growth factor binding;receptor binding;insulin-like growth factor II binding;insulin-like growth factor I binding	GO:0005576;GO:0005615;GO:0005615;GO:0005576;GO:0005788	extracellular region;extracellular space;extracellular space;extracellular region;endoplasmic reticulum lumen
JPH2	5.33689	2.416	1.33405e-41	7.04101e-39	JPH2	GO:0051209;GO:0055074;GO:0060314;GO:0060402;GO:0007204;GO:0055024;GO:0060316;GO:0051209;GO:0055074;GO:0060314;GO:0060402;GO:0060316	release of sequestered calcium ion into cytosol;calcium ion homeostasis;regulation of ryanodine-sensitive calcium-release channel activity;calcium ion transport into cytosol;positive regulation of cytosolic calcium ion concentration;regulation of cardiac muscle tissue development;positive regulation of ryanodine-sensitive calcium-release channel activity;release of sequestered calcium ion into cy…	GO:0005515;GO:0010314;GO:0032266;GO:0080025;GO:0005546;GO:0005547;GO:0001786;GO:0070300;GO:0070273;GO:0015278;GO:0015278;GO:0005515;GO:0010314;GO:0032266;GO:0080025;GO:0005546;GO:0005547;GO:0001786;GO:0070300;GO:0070273;GO:0015278	protein binding;phosphatidylinositol-5-phosphate binding;phosphatidylinositol-3-phosphate binding;phosphatidylinositol-3,5-bisphosphate binding;phosphatidylinositol-4,5-bisphosphate binding;phosphatidylinositol-3,4,5-trisphosphate binding;phosphatidylserine binding;phosphatidic acid binding;phosphatidylinositol-4-phosphate binding;calcium-release channel activity;calcium-release channel activity;…	GO:0030314;GO:0016020;GO:0016021;GO:0005783;GO:0005789;GO:0005886;GO:0016529;GO:0033017;GO:0014701;GO:0030018;GO:0016020;GO:0016021;GO:0005783;GO:0005789;GO:0005886;GO:0030314;GO:0016529;GO:0033017;GO:0014701	junctional membrane complex;membrane;integral component of membrane;endoplasmic reticulum;endoplasmic reticulum membrane;plasma membrane;sarcoplasmic reticulum;sarcoplasmic reticulum membrane;junctional sarcoplasmic reticulum membrane;Z disc;membrane;integral component of membrane;endoplasmic reticulum;endoplasmic reticulum membrane;plasma membrane;junctional membrane complex;sarcoplasmic reticul…
TGM2	6.10504	2.61	4.19085e-41	2.12342e-38	TGM2	GO:0018149;GO:0043065;GO:0045785;GO:0043277;GO:0001974;GO:0007200;GO:0018153;GO:0032471;GO:0032471;GO:0043065;GO:0043123;GO:0045785;GO:0048661;GO:0050729;GO:0051260;GO:0051482;GO:0051561;GO:0051561;GO:0060445;GO:0060662;GO:0018149;GO:0018149	peptide cross-linking;positive regulation of apoptotic process;positive regulation of cell adhesion;apoptotic cell clearance;blood vessel remodeling;phospholipase C-activating G-protein coupled receptor signaling pathway;isopeptide cross-linking via N6-(L-isoglutamyl)-L-lysine;negative regulation of endoplasmic reticulum calcium ion concentration;negative regulation of endoplasmic reticulum calci…	GO:0003810;GO:0046872;GO:0016740;GO:0016746;GO:0005515;GO:0003810;GO:0003810;GO:0005525;GO:0019904	protein-glutamine gamma-glutamyltransferase activity;metal ion binding;transferase activity;transferase activity, transferring acyl groups;protein binding;protein-glutamine gamma-glutamyltransferase activity;protein-glutamine gamma-glutamyltransferase activity;GTP binding;protein domain specific binding	GO:0005829;GO:0005739;GO:0005925;GO:0070062;GO:0031012;GO:0005783;GO:0005737;GO:0005739;GO:0005886;GO:0031226;GO:0031226	cytosol;mitochondrion;focal adhesion;extracellular exosome;extracellular matrix;endoplasmic reticulum;cytoplasm;mitochondrion;plasma membrane;intrinsic component of plasma membrane;intrinsic component of plasma membrane
MT1E	21.8415	4.449	1.64002e-39	7.99003e-37	MT1E	GO:0045926;GO:0071294;GO:0071276;GO:0045926;GO:0071294;GO:0071276	negative regulation of growth;cellular response to zinc ion;cellular response to cadmium ion;negative regulation of growth;cellular response to zinc ion;cellular response to cadmium ion	GO:0046872;GO:0008270;GO:0046872;GO:0046872;GO:0008270	metal ion binding;zinc ion binding;metal ion binding;metal ion binding;zinc ion binding	GO:0005634;GO:0005737;GO:0048471;GO:0005634;GO:0005737;GO:0048471	nucleus;cytoplasm;perinuclear region of cytoplasm;nucleus;cytoplasm;perinuclear region of cytoplasm
FGD4	15.9115	3.992	1.07951e-37	5.06452e-35	FGD4	GO:0035023;GO:0065009;GO:0035023;GO:0065009;GO:0035023;GO:0051056;GO:0007010;GO:0007186;GO:0046847;GO:0008360;GO:0030036;GO:0043087;GO:0043065;GO:0035023;GO:0065009;GO:0035023;GO:0065009;GO:0030032;GO:0030035	regulation of Rho protein signal transduction;regulation of molecular function;regulation of Rho protein signal transduction;regulation of molecular function;regulation of Rho protein signal transduction;regulation of small GTPase mediated signal transduction;cytoskeleton organization;G-protein coupled receptor signaling pathway;filopodium assembly;regulation of cell shape;actin cytoskeleton orga…	GO:0046872;GO:0005089;GO:0005085;GO:0046872;GO:0005089;GO:0005085;GO:0046872;GO:0005089;GO:0003779;GO:0005085;GO:0005085;GO:0005085;GO:0005089;GO:0031267;GO:0046872;GO:0005089;GO:0005085;GO:0046872;GO:0005089;GO:0005085	metal ion binding;Rho guanyl-nucleotide exchange factor activity;guanyl-nucleotide exchange factor activity;metal ion binding;Rho guanyl-nucleotide exchange factor activity;guanyl-nucleotide exchange factor activity;metal ion binding;Rho guanyl-nucleotide exchange factor activity;actin binding;guanyl-nucleotide exchange factor activity;guanyl-nucleotide exchange factor activity;guanyl-nucleotide …	GO:0005737;GO:0005737;GO:0005794;GO:0005856;GO:0042995;GO:0005829;GO:0030027;GO:0030175;GO:0001726;GO:0030027;GO:0030175	cytoplasm;cytoplasm;Golgi apparatus;cytoskeleton;cell projection;cytosol;lamellipodium;filopodium;ruffle;lamellipodium;filopodium
ANGPTL4	19.2662	4.268	1.21844e-37	5.51211e-35	ANGPTL4	GO:0001525;GO:0043066;GO:0007275;GO:0030154;GO:0051005;GO:0001666;GO:0043066;GO:0045766;GO:0019216;GO:0070328;GO:0001666;GO:0051005;GO:0051260;GO:0070328;GO:2000352;GO:0001525;GO:0043066;GO:0007275;GO:0030154;GO:0051005;GO:0001666;GO:0043066;GO:0045766;GO:0019216;GO:0070328;GO:0043066;GO:0007275;GO:0030154;GO:0001525;GO:0051005;GO:0001666;GO:0043066;GO:0045766;GO:0019216;GO:0070328;GO:0001525;GO:…	angiogenesis;negative regulation of apoptotic process;multicellular organism development;cell differentiation;negative regulation of lipoprotein lipase activity;response to hypoxia;negative regulation of apoptotic process;positive regulation of angiogenesis;regulation of lipid metabolic process;triglyceride homeostasis;response to hypoxia;negative regulation of lipoprotein lipase activity;protein…	GO:0005515;GO:0042802;GO:0004857;GO:0004857;GO:0005515;GO:0042802;GO:0004857;GO:0005515;GO:0042802;GO:0004857	protein binding;identical protein binding;enzyme inhibitor activity;enzyme inhibitor activity;protein binding;identical protein binding;enzyme inhibitor activity;protein binding;identical protein binding;enzyme inhibitor activity	GO:0005615;GO:0005576;GO:0005576;GO:0005578;GO:0005576;GO:0072562;GO:0005615;GO:0005615;GO:0005576;GO:0005576;GO:0005578;GO:0005576;GO:0072562;GO:0005615;GO:0005615;GO:0005576;GO:0005576;GO:0005578;GO:0005576;GO:0072562;GO:0005615;GO:0005615	extracellular space;extracellular region;extracellular region;proteinaceous extracellular matrix;extracellular region;blood microparticle;extracellular space;extracellular space;extracellular region;extracellular region;proteinaceous extracellular matrix;extracellular region;blood microparticle;extracellular space;extracellular space;extracellular region;extracellular region;proteinaceous extrace…
MT1G	9.60643	3.264	2.12426e-37	9.27864e-35	MT1G	GO:0035924;GO:0045926;GO:0071294;GO:0071294;GO:0071276;GO:0030224;GO:0042117;GO:0071280;GO:0035924;GO:0045926;GO:0071294;GO:0071294;GO:0071276;GO:0030224;GO:0042117;GO:0071280	cellular response to vascular endothelial growth factor stimulus;negative regulation of growth;cellular response to zinc ion;cellular response to zinc ion;cellular response to cadmium ion;monocyte differentiation;monocyte activation;cellular response to copper ion;cellular response to vascular endothelial growth factor stimulus;negative regulation of growth;cellular response to zinc ion;cellular …	GO:0046872;GO:0008270;GO:0005515;GO:0046872;GO:0046872;GO:0008270;GO:0005515;GO:0046872	metal ion binding;zinc ion binding;protein binding;metal ion binding;metal ion binding;zinc ion binding;protein binding;metal ion binding	GO:0005634;GO:0005737;GO:0048471;GO:0005634;GO:0005737;GO:0048471	nucleus;cytoplasm;perinuclear region of cytoplasm;nucleus;cytoplasm;perinuclear region of cytoplasm
HDAC5	3.43188	1.779	3.90295e-37	1.64796e-34	HDAC5	GO:0016575;GO:0006325;GO:0040029;GO:0006325;GO:0006351;GO:0006355;GO:0070932;GO:0006476;GO:0006954;GO:0090051;GO:0051091;GO:0010832;GO:0045944;GO:0000122;GO:0042113;GO:0045892;GO:0032869;GO:0000122;GO:0006338;GO:0040029;GO:0030183;GO:0043393;GO:0016575;GO:0010830;GO:0006342;GO:0014823;GO:0030182;GO:0042220;GO:0042493;GO:0071222;GO:0016575;GO:0006325;GO:0040029;GO:0006325;GO:0006351;GO:0006355;GO:…	histone deacetylation;chromatin organization;regulation of gene expression, epigenetic;chromatin organization;transcription, DNA-templated;regulation of transcription, DNA-templated;histone H3 deacetylation;protein deacetylation;inflammatory response;negative regulation of cell migration involved in sprouting angiogenesis;positive regulation of DNA binding transcription factor activity;negative r…	GO:0004407;GO:0046872;GO:0016787;GO:0032041;GO:0005515;GO:0001047;GO:0044212;GO:0008134;GO:0004407;GO:0033558;GO:0042826;GO:0005080;GO:0001085;GO:0070491;GO:0004407;GO:0003682;GO:0008134;GO:0004407;GO:0046872;GO:0016787;GO:0032041;GO:0005515;GO:0001047;GO:0044212;GO:0008134;GO:0004407;GO:0033558;GO:0042826;GO:0005080;GO:0001085;GO:0070491;GO:0004407;GO:0004407;GO:0046872;GO:0016787;GO:0032041;GO:…	histone deacetylase activity;metal ion binding;hydrolase activity;NAD-dependent histone deacetylase activity (H3-K14 specific);protein binding;core promoter binding;transcription regulatory region DNA binding;transcription factor binding;histone deacetylase activity;protein deacetylase activity;histone deacetylase binding;protein kinase C binding;RNA polymerase II transcription factor binding;rep…	GO:0005634;GO:0005737;GO:0000118;GO:0005634;GO:0016607;GO:0005794;GO:0005829;GO:0005737;GO:0005654;GO:0000118;GO:0005634;GO:0005737;GO:0000118;GO:0005634;GO:0016607;GO:0005794;GO:0005829;GO:0005737;GO:0005654;GO:0000118;GO:0005634;GO:0005737;GO:0000118;GO:0005634;GO:0016607;GO:0005794;GO:0005829;GO:0005737;GO:0005654;GO:0000118;GO:0005634;GO:0005737	nucleus;cytoplasm;histone deacetylase complex;nucleus;nuclear speck;Golgi apparatus;cytosol;cytoplasm;nucleoplasm;histone deacetylase complex;nucleus;cytoplasm;histone deacetylase complex;nucleus;nuclear speck;Golgi apparatus;cytosol;cytoplasm;nucleoplasm;histone deacetylase complex;nucleus;cytoplasm;histone deacetylase complex;nucleus;nuclear speck;Golgi apparatus;cytosol;cytoplasm;nucleoplasm;h…
SORT1	3.91768	1.97	8.97693e-36	3.66809e-33	SORT1	GO:0007275;GO:0030154;GO:0051005;GO:0006897;GO:0001503;GO:0016050;GO:0007186;GO:0008625;GO:0007218;GO:0010468;GO:0046323;GO:0032868;GO:0008333;GO:0006897;GO:0006895;GO:0014902;GO:0014902;GO:0016050;GO:0032509;GO:0032868;GO:0038180;GO:0045599;GO:0046323;GO:0048011;GO:0048227;GO:1904037;GO:0007275;GO:0030154;GO:0051005;GO:0006897;GO:0001503;GO:0016050;GO:0007186;GO:0008625;GO:0007218;GO:0010468;GO:…	multicellular organism development;cell differentiation;negative regulation of lipoprotein lipase activity;endocytosis;ossification;vesicle organization;G-protein coupled receptor signaling pathway;extrinsic apoptotic signaling pathway via death domain receptors;neuropeptide signaling pathway;regulation of gene expression;glucose import;response to insulin;endosome to lysosome transport;endocytos…	GO:0005515;GO:0005515;GO:0019899;GO:0048406;GO:0010465;GO:0030379;GO:0005515;GO:0005515;GO:0005515;GO:0005515;GO:0019899;GO:0048406;GO:0010465;GO:0030379	protein binding;protein binding;enzyme binding;nerve growth factor binding;nerve growth factor receptor activity;neurotensin receptor activity, non-G-protein coupled;protein binding;protein binding;protein binding;protein binding;enzyme binding;nerve growth factor binding;nerve growth factor receptor activity;neurotensin receptor activity, non-G-protein coupled	GO:0016021;GO:0005634;GO:0016020;GO:0005794;GO:0005829;GO:0005794;GO:0005765;GO:0005886;GO:0005783;GO:0005789;GO:0005886;GO:0005764;GO:0048471;GO:0032580;GO:0005768;GO:0010008;GO:0009986;GO:0031965;GO:0005886;GO:0031410;GO:0005769;GO:0016021;GO:0005905;GO:0030136;GO:0030140;GO:0030425;GO:0030659;GO:0043025;GO:0043231;GO:0016021;GO:0005634;GO:0016020;GO:0005794;GO:0005829;GO:0005794;GO:0005765;GO:…	integral component of membrane;nucleus;membrane;Golgi apparatus;cytosol;Golgi apparatus;lysosomal membrane;plasma membrane;endoplasmic reticulum;endoplasmic reticulum membrane;plasma membrane;lysosome;perinuclear region of cytoplasm;Golgi cisterna membrane;endosome;endosome membrane;cell surface;nuclear membrane;plasma membrane;cytoplasmic vesicle;early endosome;integral component of membrane;cla…
NPTX1	0.292803	-1.772	1.70616e-35	6.75371e-33	NPTX1	GO:0007417;GO:0007268;GO:0060385	central nervous system development;chemical synaptic transmission;axonogenesis involved in innervation	GO:0046872	metal ion binding	GO:0031410;GO:0030133	cytoplasmic vesicle;transport vesicle
ADAMTS2	7.76508	2.957	4.03103e-35	1.5018e-32	ADAMTS2	GO:0006508;GO:0030574;GO:0007283;GO:0016485;GO:0030199;GO:0030324;GO:0043588;GO:0006508;GO:0030574	proteolysis;collagen catabolic process;spermatogenesis;protein processing;collagen fibril organization;lung development;skin development;proteolysis;collagen catabolic process	GO:0008270;GO:0004222;GO:0008233;GO:0008237;GO:0046872;GO:0016787;GO:0004222;GO:0008237;GO:0008270;GO:0004222;GO:0008237;GO:0046872;GO:0016787;GO:0008233;GO:0004222;GO:0008237	zinc ion binding;metalloendopeptidase activity;peptidase activity;metallopeptidase activity;metal ion binding;hydrolase activity;metalloendopeptidase activity;metallopeptidase activity;zinc ion binding;metalloendopeptidase activity;metallopeptidase activity;metal ion binding;hydrolase activity;peptidase activity;metalloendopeptidase activity;metallopeptidase activity	GO:0005578;GO:0005576;GO:0005576;GO:0005615;GO:0005578;GO:0005576;GO:0005576	proteinaceous extracellular matrix;extracellular region;extracellular region;extracellular space;proteinaceous extracellular matrix;extracellular region;extracellular region
ADGRG1	0.127892	-2.967	4.02202e-35	1.5018e-32	ADGRG1	GO:0007186;GO:0007166;GO:0007155;GO:0007155;GO:0007165;GO:0007275;GO:0030154;GO:0007399;GO:0008285;GO:0016477;GO:0001525;GO:0007186;GO:0007267;GO:0007155;GO:0045785;GO:0007266;GO:2001223;GO:0070528;GO:0035025;GO:0021819;GO:0021801;GO:0007420;GO:0010573;GO:0007186;GO:0007166;GO:0007155;GO:0007155;GO:0007165;GO:0007275;GO:0021796;GO:0021801;GO:0021819;GO:0035025;GO:0072520;GO:2000179;GO:2001223;GO:…	G-protein coupled receptor signaling pathway;cell surface receptor signaling pathway;cell adhesion;cell adhesion;signal transduction;multicellular organism development;cell differentiation;nervous system development;negative regulation of cell proliferation;cell migration;angiogenesis;G-protein coupled receptor signaling pathway;cell-cell signaling;cell adhesion;positive regulation of cell adhesi…	GO:0004930;GO:0004888;GO:0004871;GO:0004930;GO:0008201;GO:0008201;GO:0050840;GO:0004930;GO:0005518;GO:0004930;GO:0004888;GO:0004871;GO:0004930;GO:0005518;GO:0008201;GO:0050840;GO:0008201;GO:0050840;GO:0004930;GO:0005518;GO:0004930;GO:0004888;GO:0004871;GO:0004930;GO:0008201;GO:0008201;GO:0050840;GO:0004930;GO:0005518;GO:0004930;GO:0004888;GO:0004871;GO:0004930;GO:0008201;GO:0008201;GO:0050840;GO:…	G-protein coupled receptor activity;transmembrane signaling receptor activity;signal transducer activity;G-protein coupled receptor activity;heparin binding;heparin binding;extracellular matrix binding;G-protein coupled receptor activity;collagen binding;G-protein coupled receptor activity;transmembrane signaling receptor activity;signal transducer activity;G-protein coupled receptor activity;col…	GO:0016021;GO:0016020;GO:0005622;GO:0005886;GO:0005576;GO:0045121;GO:0070062;GO:0005887;GO:0016021;GO:0097451;GO:0016021;GO:0016020;GO:0005622;GO:0005886;GO:0005576;GO:0097451;GO:0045121;GO:0070062;GO:0005887;GO:0016021;GO:0097451;GO:0016021;GO:0016020;GO:0005622;GO:0005886;GO:0005576;GO:0045121;GO:0070062;GO:0005887;GO:0016021;GO:0097451;GO:0016021;GO:0016020;GO:0005622;GO:0005886;GO:0005576;GO:…	integral component of membrane;membrane;intracellular;plasma membrane;extracellular region;membrane raft;extracellular exosome;integral component of plasma membrane;integral component of membrane;glial limiting end-foot;integral component of membrane;membrane;intracellular;plasma membrane;extracellular region;glial limiting end-foot;membrane raft;extracellular exosome;integral component of plasma…
DIO2	0.159099	-2.652	6.00226e-35	2.1723e-32	DIO2	GO:0055114;GO:0042446;GO:0006590;GO:0042403;GO:0001514;GO:0055114;GO:0042446;GO:0006590;GO:0042403;GO:0001514;GO:0055114;GO:0045454;GO:0042446;GO:0042404;GO:0055114;GO:0042446;GO:0055114;GO:0042446	oxidation-reduction process;hormone biosynthetic process;thyroid hormone generation;thyroid hormone metabolic process;selenocysteine incorporation;oxidation-reduction process;hormone biosynthetic process;thyroid hormone generation;thyroid hormone metabolic process;selenocysteine incorporation;oxidation-reduction process;cell redox homeostasis;hormone biosynthetic process;thyroid hormone catabolic…	GO:0004800;GO:0016491;GO:0031625;GO:0008430;GO:0004800;GO:0008430;GO:0004800;GO:0004800;GO:0016491;GO:0031625;GO:0008430;GO:0004800;GO:0008430;GO:0004800;GO:0004800;GO:0016491;GO:0004800;GO:0016491;GO:0004800;GO:0016491	thyroxine 5'-deiodinase activity;oxidoreductase activity;ubiquitin protein ligase binding;selenium binding;thyroxine 5'-deiodinase activity;selenium binding;thyroxine 5'-deiodinase activity;thyroxine 5'-deiodinase activity;oxidoreductase activity;ubiquitin protein ligase binding;selenium binding;thyroxine 5'-deiodinase activity;selenium binding;thyroxine 5'-deiodinase activity;thyroxine 5'-deiodi…	GO:0016020;GO:0016020;GO:0016021;GO:0005886;GO:0016020;GO:0016020;GO:0016021;GO:0005886;GO:0005623;GO:0016020;GO:0016021	membrane;membrane;integral component of membrane;plasma membrane;membrane;membrane;integral component of membrane;plasma membrane;cell;membrane;integral component of membrane
DMD	8.99423	3.169	8.55469e-34	3.01006e-31	DMD	GO:0007010;GO:0010880;GO:0010881;GO:0002027;GO:0007517;GO:0060048;GO:0033137;GO:0034622;GO:0030049;GO:0035994;GO:0034613;GO:0046716;GO:0014809;GO:0014819;GO:0043043;GO:0048747;GO:0060314;GO:0086001;GO:1901385;GO:1902083;GO:2000651;GO:0001954;GO:0002027;GO:0006355;GO:0007517;GO:0007519;GO:0007568;GO:0008065;GO:0008284;GO:0009414;GO:0010468;GO:0010880;GO:0010881;GO:0010976;GO:0014809;GO:0014819;GO:…	cytoskeleton organization;regulation of release of sequestered calcium ion into cytosol by sarcoplasmic reticulum;regulation of cardiac muscle contraction by regulation of the release of sequestered calcium ion;regulation of heart rate;muscle organ development;cardiac muscle contraction;negative regulation of peptidyl-serine phosphorylation;cellular macromolecular complex assembly;muscle filament…	GO:0008270;GO:0003779;GO:0002162;GO:0046872;GO:0003779;GO:0005515;GO:0005200;GO:0002162;GO:0003779;GO:0017022;GO:0008307;GO:0008307;GO:0017166;GO:0050998;GO:0008270;GO:0005515;GO:0003779;GO:0002162;GO:0046872;GO:0008270;GO:0005515;GO:0003779;GO:0002162;GO:0046872;GO:0008270;GO:0005515;GO:0003779;GO:0002162;GO:0046872;GO:0005178;GO:0005521;GO:0030165;GO:0050998;GO:0008270;GO:0003779;GO:0002162;GO:…	zinc ion binding;actin binding;dystroglycan binding;metal ion binding;actin binding;protein binding;structural constituent of cytoskeleton;dystroglycan binding;actin binding;myosin binding;structural constituent of muscle;structural constituent of muscle;vinculin binding;nitric-oxide synthase binding;zinc ion binding;protein binding;actin binding;dystroglycan binding;metal ion binding;zinc ion bi…	GO:0005737;GO:0016020;GO:0005886;GO:0005856;GO:0030054;GO:0045202;GO:0045211;GO:0005829;GO:0042383;GO:0032991;GO:0042383;GO:0009986;GO:0005856;GO:0016328;GO:0045202;GO:0030018;GO:0043034;GO:0016010;GO:0016010;GO:0016010;GO:0045121;GO:0030175;GO:0016013;GO:0030055;GO:0031527;GO:0044306;GO:0005737;GO:0016020;GO:0005886;GO:0005856;GO:0030054;GO:0045202;GO:0045211;GO:0005737;GO:0016020;GO:0005886;GO:…	cytoplasm;membrane;plasma membrane;cytoskeleton;cell junction;synapse;postsynaptic membrane;cytosol;sarcolemma;macromolecular complex;sarcolemma;cell surface;cytoskeleton;lateral plasma membrane;synapse;Z disc;costamere;dystrophin-associated glycoprotein complex;dystrophin-associated glycoprotein complex;dystrophin-associated glycoprotein complex;membrane raft;filopodium;syntrophin complex;cell-s…
ZBTB16	130.057	7.023	1.04475e-33	3.57673e-31	ZBTB16	GO:0006351;GO:0006355;GO:0016567;GO:0006915;GO:0001501;GO:0001823;GO:0007417;GO:0008285;GO:0009880;GO:0009952;GO:0030097;GO:0034504;GO:0035116;GO:0035136;GO:0035137;GO:0042733;GO:0043065;GO:0045638;GO:0048133;GO:0051138;GO:0045893;GO:0000122;GO:0043687;GO:0032332;GO:0051216;GO:0045892;GO:0045638;GO:0030097;GO:0030097;GO:0001823;GO:0045600;GO:0045892;GO:0007417;GO:0030099;GO:0061036;GO:0045778;GO:…	transcription, DNA-templated;regulation of transcription, DNA-templated;protein ubiquitination;apoptotic process;skeletal system development;mesonephros development;central nervous system development;negative regulation of cell proliferation;embryonic pattern specification;anterior/posterior pattern specification;hemopoiesis;protein localization to nucleus;embryonic hindlimb morphogenesis;forelim…	GO:0005515;GO:0003676;GO:0046872;GO:0003677;GO:0003677;GO:0042803;GO:0005515;GO:0003690;GO:0003700;GO:0008022;GO:0019904;GO:0042802;GO:0003677;GO:0000980;GO:0001206;GO:0005515;GO:0005515;GO:0005515;GO:0003676;GO:0046872;GO:0003677;GO:0003677;GO:0042803;GO:0005515;GO:0042802;GO:0003677;GO:0000980;GO:0001206	protein binding;nucleic acid binding;metal ion binding;DNA binding;DNA binding;protein homodimerization activity;protein binding;double-stranded DNA binding;DNA binding transcription factor activity;protein C-terminus binding;protein domain specific binding;identical protein binding;DNA binding;RNA polymerase II distal enhancer sequence-specific DNA binding;transcriptional repressor activity, RNA…	GO:0005634;GO:0005634;GO:0016607;GO:0005829;GO:0005886;GO:0005829;GO:0032991;GO:0016605;GO:0016604;GO:0017053;GO:0005634;GO:0005634;GO:0016607;GO:0005829;GO:0032991;GO:0016605;GO:0016604;GO:0017053	nucleus;nucleus;nuclear speck;cytosol;plasma membrane;cytosol;macromolecular complex;PML body;nuclear body;transcriptional repressor complex;nucleus;nucleus;nuclear speck;cytosol;macromolecular complex;PML body;nuclear body;transcriptional repressor complex
GRAMD2B	3.47738	1.798	1.12486e-32	3.74965e-30	GRAMD2B	NA	NA	GO:0005515;GO:0042802;GO:0005515;GO:0042802;GO:0005515;GO:0042802;GO:0005515;GO:0042802;GO:0005515;GO:0042802	protein binding;identical protein binding;protein binding;identical protein binding;protein binding;identical protein binding;protein binding;identical protein binding;protein binding;identical protein binding	GO:0005881;GO:0005881;GO:0016020;GO:0016021;GO:0016020;GO:0016021;GO:0005881;GO:0005881;GO:0005881	cytoplasmic microtubule;cytoplasmic microtubule;membrane;integral component of membrane;membrane;integral component of membrane;cytoplasmic microtubule;cytoplasmic microtubule;cytoplasmic microtubule
ABLIM3	3.00632	1.588	3.04762e-32	9.89853e-30	ABLIM3	GO:0006351;GO:0007010;GO:0030036;GO:0030032;GO:0060271;GO:1903955;GO:0006351;GO:0007010;GO:0030036;GO:0030032;GO:0060271;GO:1903955;GO:0006351;GO:0007010;GO:0030036;GO:0030032;GO:0060271;GO:1903955;GO:0045944;GO:0006351;GO:0030036;GO:0006351;GO:0007010;GO:0030036;GO:0030032;GO:0060271;GO:1903955;GO:0006351;GO:0007010;GO:0030036;GO:0006351;GO:0007010;GO:0030036;GO:0030032;GO:0060271;GO:1903955;GO:…	transcription, DNA-templated;cytoskeleton organization;actin cytoskeleton organization;lamellipodium assembly;cilium assembly;positive regulation of protein targeting to mitochondrion;transcription, DNA-templated;cytoskeleton organization;actin cytoskeleton organization;lamellipodium assembly;cilium assembly;positive regulation of protein targeting to mitochondrion;transcription, DNA-templated;cy…	GO:0003779;GO:0046872;GO:0005515;GO:0003779;GO:0046872;GO:0005515;GO:0003779;GO:0046872;GO:0005515;GO:0046872;GO:0003779;GO:0003779;GO:0046872;GO:0005515;GO:0003779;GO:0046872;GO:0003779;GO:0046872;GO:0005515;GO:0003779	actin binding;metal ion binding;protein binding;actin binding;metal ion binding;protein binding;actin binding;metal ion binding;protein binding;metal ion binding;actin binding;actin binding;metal ion binding;protein binding;actin binding;metal ion binding;actin binding;metal ion binding;protein binding;actin binding	GO:0005737;GO:0001725;GO:0030027;GO:0005737;GO:0001725;GO:0030027;GO:0005737;GO:0001725;GO:0030027;GO:0005737;GO:0001725;GO:0030027;GO:0005737;GO:0001725;GO:0030027	cytoplasm;stress fiber;lamellipodium;cytoplasm;stress fiber;lamellipodium;cytoplasm;stress fiber;lamellipodium;cytoplasm;stress fiber;lamellipodium;cytoplasm;stress fiber;lamellipodium
ALCAM	3.34963	1.744	1.13006e-30	3.57861e-28	ALCAM	GO:0007155;GO:0007155;GO:0002376;GO:0002250;GO:0007165;GO:0007155;GO:0048846;GO:0031290;GO:0007157;GO:1990138;GO:0007411;GO:0008045;GO:0007155;GO:0007155;GO:0002376;GO:0002250;GO:0007165;GO:0007155;GO:0048846;GO:0031290;GO:0007157;GO:1990138	cell adhesion;cell adhesion;immune system process;adaptive immune response;signal transduction;cell adhesion;axon extension involved in axon guidance;retinal ganglion cell axon guidance;heterophilic cell-cell adhesion via plasma membrane cell adhesion molecules;neuron projection extension;axon guidance;motor neuron axon guidance;cell adhesion;cell adhesion;immune system process;adaptive immune re…	GO:0005515;GO:0042802;GO:0005102;GO:0005515;GO:0042802;GO:0005102	protein binding;identical protein binding;receptor binding;protein binding;identical protein binding;receptor binding	GO:0016020;GO:0016021;GO:0005886;GO:0042995;GO:0005576;GO:0005925;GO:0030425;GO:0005887;GO:0030424;GO:0030424;GO:0070062;GO:0031226;GO:0001772;GO:0042101;GO:0009897;GO:0043025;GO:0016020;GO:0016021;GO:0005886;GO:0042995;GO:0005576;GO:0005925;GO:0030425;GO:0005887;GO:0030424;GO:0030424;GO:0070062;GO:0031226;GO:0001772;GO:0042101;GO:0016020;GO:0016021;GO:0016020;GO:0016021	membrane;integral component of membrane;plasma membrane;cell projection;extracellular region;focal adhesion;dendrite;integral component of plasma membrane;axon;axon;extracellular exosome;intrinsic component of plasma membrane;immunological synapse;T cell receptor complex;external side of plasma membrane;neuronal cell body;membrane;integral component of membrane;plasma membrane;cell projection;ext…
PLCE1-AS1	365.063	8.51201	2.56022e-30	7.72149e-28	PLCE1-AS1	NA	NA	NA	NA	NA	NA
BCL2L1	2.91804	1.545	2.5181e-30	7.72149e-28	BCL2L1	GO:0042981;GO:0006915;GO:2001243;GO:0006897;GO:0043066;GO:0019221;GO:2001240;GO:1902042;GO:0007093;GO:0032465;GO:2001244;GO:1902230;GO:0090201;GO:0001836;GO:1900118;GO:0034097;GO:0046902;GO:0051881;GO:1903077;GO:0008637;GO:0019050;GO:0042981;GO:0006915;GO:2001243;GO:0006897;GO:0043066;GO:0019221;GO:2001240;GO:1902042;GO:0007093;GO:0032465;GO:2001244;GO:1902230;GO:0090201;GO:0001836;GO:1900118;GO:…	regulation of apoptotic process;apoptotic process;negative regulation of intrinsic apoptotic signaling pathway;endocytosis;negative regulation of apoptotic process;cytokine-mediated signaling pathway;negative regulation of extrinsic apoptotic signaling pathway in absence of ligand;negative regulation of extrinsic apoptotic signaling pathway via death domain receptors;mitotic cell cycle checkpoint…	GO:0005515;GO:0042802;GO:0019901;GO:0051434;GO:0042803;GO:0046982;GO:0005515;GO:0042802;GO:0019901;GO:0051434;GO:0042803;GO:0046982;GO:0005515;GO:0042802;GO:0046982;GO:0019901;GO:0051434;GO:0042803;GO:0046982	protein binding;identical protein binding;protein kinase binding;BH3 domain binding;protein homodimerization activity;protein heterodimerization activity;protein binding;identical protein binding;protein kinase binding;BH3 domain binding;protein homodimerization activity;protein heterodimerization activity;protein binding;identical protein binding;protein heterodimerization activity;protein kinas…	GO:0016020;GO:0005634;GO:0005737;GO:0005737;GO:0016021;GO:0005743;GO:0005829;GO:0005739;GO:0005856;GO:0030054;GO:0045202;GO:0005741;GO:0005741;GO:0031410;GO:0005759;GO:0005813;GO:0005815;GO:0031965;GO:0005739;GO:0005741;GO:0030672;GO:0005739;GO:0005741;GO:0097136;GO:0005634;GO:0005737;GO:0005737;GO:0016020;GO:0016021;GO:0005743;GO:0005829;GO:0005739;GO:0005856;GO:0030054;GO:0045202;GO:0005741;GO:…	membrane;nucleus;cytoplasm;cytoplasm;integral component of membrane;mitochondrial inner membrane;cytosol;mitochondrion;cytoskeleton;cell junction;synapse;mitochondrial outer membrane;mitochondrial outer membrane;cytoplasmic vesicle;mitochondrial matrix;centrosome;microtubule organizing center;nuclear membrane;mitochondrion;mitochondrial outer membrane;synaptic vesicle membrane;mitochondrion;mitoc…
CHPT1	4.15832	2.056	3.24798e-30	9.54413e-28	CHPT1	GO:0008654;GO:0006629;GO:0006656;GO:0006656;GO:0001558;GO:0006629;GO:0006656;GO:0006663;GO:0006657;GO:0008654;GO:0008654;GO:0006629;GO:0008654;GO:0006656;GO:0006656;GO:0001558;GO:0006629;GO:0006656;GO:0006663;GO:0006657;GO:0008654	phospholipid biosynthetic process;lipid metabolic process;phosphatidylcholine biosynthetic process;phosphatidylcholine biosynthetic process;regulation of cell growth;lipid metabolic process;phosphatidylcholine biosynthetic process;platelet activating factor biosynthetic process;CDP-choline pathway;phospholipid biosynthetic process;phospholipid biosynthetic process;lipid metabolic process;phosphol…	GO:0016780;GO:0046872;GO:0016740;GO:0019992;GO:0004142;GO:0004142;GO:0004142;GO:0016780;GO:0016740;GO:0016740;GO:0016780;GO:0046872;GO:0016740;GO:0016780;GO:0019992;GO:0004142;GO:0004142;GO:0004142;GO:0016740;GO:0016780	phosphotransferase activity, for other substituted phosphate groups;metal ion binding;transferase activity;diacylglycerol binding;diacylglycerol cholinephosphotransferase activity;diacylglycerol cholinephosphotransferase activity;diacylglycerol cholinephosphotransferase activity;phosphotransferase activity, for other substituted phosphate groups;transferase activity;transferase activity;phosphotr…	GO:0016020;GO:0016020;GO:0016021;GO:0005794;GO:0000139;GO:0043231;GO:0000139;GO:0016020;GO:0016021;GO:0016020;GO:0016021;GO:0016020;GO:0016020;GO:0016021;GO:0005794;GO:0000139;GO:0043231;GO:0000139;GO:0016020;GO:0016021;GO:0016020;GO:0016021	membrane;membrane;integral component of membrane;Golgi apparatus;Golgi membrane;intracellular membrane-bounded organelle;Golgi membrane;membrane;integral component of membrane;membrane;integral component of membrane;membrane;membrane;integral component of membrane;Golgi apparatus;Golgi membrane;intracellular membrane-bounded organelle;Golgi membrane;membrane;integral component of membrane;membran…
ACSL1	3.81848	1.933	3.31524e-30	9.54413e-28	ACSL1	GO:0008152;GO:0008152;GO:0006629;GO:0006631;GO:0035338;GO:0036109;GO:0001676;GO:0044539;GO:0019216;GO:0043651;GO:0006641;GO:0007584;GO:0008610;GO:0010033;GO:0014070;GO:0015908;GO:0033211;GO:0034201;GO:0042178;GO:0042493;GO:0071902;GO:0008152;GO:0008152;GO:0006629;GO:0006631;GO:0035338;GO:0036109;GO:0001676;GO:0044539;GO:0019216;GO:0043651;GO:0008610;GO:0008152;GO:0008152;GO:0006629;GO:0006631;GO:…	metabolic process;metabolic process;lipid metabolic process;fatty acid metabolic process;long-chain fatty-acyl-CoA biosynthetic process;alpha-linolenic acid metabolic process;long-chain fatty acid metabolic process;long-chain fatty acid import;regulation of lipid metabolic process;linoleic acid metabolic process;triglyceride metabolic process;response to nutrient;lipid biosynthetic process;respon…	GO:0003824;GO:0016874;GO:0003824;GO:0000166;GO:0005524;GO:0016874;GO:0004467;GO:0004467;GO:0004467;GO:0102391;GO:0003824;GO:0003824;GO:0000166;GO:0005524;GO:0016874;GO:0004467;GO:0004467;GO:0004467;GO:0102391;GO:0003824;GO:0003824;GO:0000166;GO:0005524;GO:0016874;GO:0004467;GO:0004467;GO:0004467;GO:0102391;GO:0003824;GO:0000166;GO:0005524;GO:0016874;GO:0004467;GO:0004467;GO:0004467;GO:0102391;GO:…	catalytic activity;ligase activity;catalytic activity;nucleotide binding;ATP binding;ligase activity;long-chain fatty acid-CoA ligase activity;long-chain fatty acid-CoA ligase activity;long-chain fatty acid-CoA ligase activity;decanoate--CoA ligase activity;catalytic activity;catalytic activity;nucleotide binding;ATP binding;ligase activity;long-chain fatty acid-CoA ligase activity;long-chain fat…	GO:0016020;GO:0016020;GO:0016021;GO:0005783;GO:0005789;GO:0005739;GO:0005739;GO:0005741;GO:0005777;GO:0005778;GO:0005789;GO:0043231;GO:0031090;GO:0005741;GO:0005886;GO:0016020;GO:0016020;GO:0016021;GO:0005783;GO:0005789;GO:0005739;GO:0005739;GO:0005741;GO:0005777;GO:0005778;GO:0005789;GO:0043231;GO:0031090;GO:0005741;GO:0016020;GO:0016021;GO:0016020;GO:0016021;GO:0016020;GO:0016020;GO:0016021;GO:…	membrane;membrane;integral component of membrane;endoplasmic reticulum;endoplasmic reticulum membrane;mitochondrion;mitochondrion;mitochondrial outer membrane;peroxisome;peroxisomal membrane;endoplasmic reticulum membrane;intracellular membrane-bounded organelle;organelle membrane;mitochondrial outer membrane;plasma membrane;membrane;membrane;integral component of membrane;endoplasmic reticulum;e…
JAG1	3.53571	1.822	4.12317e-30	1.16063e-27	JAG1	GO:0007154;GO:0007275;GO:0007219;GO:0010469;GO:0007219;GO:0007219;GO:0007399;GO:0045944;GO:0002456;GO:0001525;GO:0042127;GO:0001709;GO:0007219;GO:0007220;GO:0030097;GO:0035333;GO:0045747;GO:0072006;GO:0097150;GO:0022408;GO:0072015;GO:0030216;GO:0001953;GO:0030336;GO:0045446;GO:0003184;GO:2000737;GO:0061314;GO:0061314;GO:0060411;GO:0045445;GO:0035909;GO:0003215;GO:0061309;GO:0001974;GO:0002011;GO:…	cell communication;multicellular organism development;Notch signaling pathway;regulation of receptor activity;Notch signaling pathway;Notch signaling pathway;nervous system development;positive regulation of transcription from RNA polymerase II promoter;T cell mediated immunity;angiogenesis;regulation of cell proliferation;cell fate determination;Notch signaling pathway;Notch receptor processing;…	GO:0005515;GO:0005509;GO:0005112;GO:0008083;GO:0005515;GO:0005112;GO:0005112;GO:0005198;GO:0005543;GO:0005509;GO:0005509	protein binding;calcium ion binding;Notch binding;growth factor activity;protein binding;Notch binding;Notch binding;structural molecule activity;phospholipid binding;calcium ion binding;calcium ion binding	GO:0016021;GO:0016020;GO:0016020;GO:0005576;GO:0005886;GO:0005887;GO:0005912;GO:0016324;GO:0005886;GO:0016020;GO:0005886;GO:0005912;GO:0016324;GO:0045177	integral component of membrane;membrane;membrane;extracellular region;plasma membrane;integral component of plasma membrane;adherens junction;apical plasma membrane;plasma membrane;membrane;plasma membrane;adherens junction;apical plasma membrane;apical part of cell
SORBS1	4.98986	2.319	2.79941e-29	7.70872e-27	SORBS1	GO:0007015;GO:0009967;GO:0046326;GO:1903078;GO:0048041;GO:0008286;GO:2001275;GO:0006936;GO:0032869;GO:0007160;GO:0045725;GO:0046889;GO:0043149;GO:0007015;GO:0009967;GO:0046326;GO:1903078;GO:0048041;GO:0008286;GO:2001275;GO:0006936;GO:0032869;GO:0007160;GO:0045725;GO:0046889;GO:0043149;GO:0007015;GO:0009967;GO:0046326;GO:1903078;GO:0048041;GO:0008286;GO:2001275;GO:0006936;GO:0032869;GO:0007160;GO:…	actin filament organization;positive regulation of signal transduction;positive regulation of glucose import;positive regulation of protein localization to plasma membrane;focal adhesion assembly;insulin receptor signaling pathway;positive regulation of glucose import in response to insulin stimulus;muscle contraction;cellular response to insulin stimulus;cell-matrix adhesion;positive regulation …	GO:0005515;GO:0005515;GO:0003779;GO:0005158;GO:0005070;GO:0005070;GO:0008092;GO:0005515;GO:0005515;GO:0003779;GO:0005158;GO:0005070;GO:0005070;GO:0008092;GO:0005515;GO:0005515;GO:0003779;GO:0005158;GO:0005070;GO:0005070;GO:0008092;GO:0005515;GO:0005515;GO:0005515;GO:0003779;GO:0005158;GO:0005070;GO:0005070;GO:0008092;GO:0005515;GO:0005515;GO:0003779;GO:0005158;GO:0005070;GO:0005070;GO:0008092;GO:…	protein binding;protein binding;actin binding;insulin receptor binding;SH3/SH2 adaptor activity;SH3/SH2 adaptor activity;cytoskeletal protein binding;protein binding;protein binding;actin binding;insulin receptor binding;SH3/SH2 adaptor activity;SH3/SH2 adaptor activity;cytoskeletal protein binding;protein binding;protein binding;actin binding;insulin receptor binding;SH3/SH2 adaptor activity;SH3…	GO:0005634;GO:0005634;GO:0005737;GO:0016020;GO:0005813;GO:0005886;GO:0005925;GO:0005886;GO:0005856;GO:0030054;GO:0045121;GO:0005925;GO:0005829;GO:0001725;GO:0005912;GO:0005829;GO:0016363;GO:0005913;GO:0005899;GO:0005913;GO:0005915;GO:0005924;GO:0005634;GO:0005634;GO:0005737;GO:0016020;GO:0005813;GO:0005886;GO:0005925;GO:0005886;GO:0005856;GO:0030054;GO:0045121;GO:0005925;GO:0005829;GO:0001725;GO:…	nucleus;nucleus;cytoplasm;membrane;centrosome;plasma membrane;focal adhesion;plasma membrane;cytoskeleton;cell junction;membrane raft;focal adhesion;cytosol;stress fiber;adherens junction;cytosol;nuclear matrix;cell-cell adherens junction;insulin receptor complex;cell-cell adherens junction;zonula adherens;cell-substrate adherens junction;nucleus;nucleus;cytoplasm;membrane;centrosome;plasma membr…
MT2A	6.48902	2.698	7.87092e-29	2.1213e-26	MT2A	GO:0006878;GO:0035690;GO:0060333;GO:0045926;GO:0010038;GO:0036016;GO:0036018;GO:0071294	cellular copper ion homeostasis;cellular response to drug;interferon-gamma-mediated signaling pathway;negative regulation of growth;response to metal ion;cellular response to interleukin-3;cellular response to erythropoietin;cellular response to zinc ion	GO:0046872;GO:0008270;GO:0008270;GO:0005515;GO:0008144;GO:0046872	metal ion binding;zinc ion binding;zinc ion binding;protein binding;drug binding;metal ion binding	GO:0005634;GO:0005737;GO:0048471;GO:0005829	nucleus;cytoplasm;perinuclear region of cytoplasm;cytosol
EPS8	2.62624	1.393	8.42189e-29	2.2225e-26	EPS8	GO:0009967;GO:0051016;GO:0051017;GO:0051016;GO:0051017;GO:0009967;GO:0008360;GO:0007165;GO:0051017;GO:0008283;GO:0010458;GO:0070358;GO:0007173;GO:0051016;GO:0030832;GO:0016601;GO:0036336;GO:0051764;GO:0051016;GO:0051017;GO:0051016;GO:0051017;GO:0009967;GO:0008360;GO:0007165;GO:0051017;GO:0008283;GO:0010458;GO:0070358;GO:0007173;GO:0051016;GO:0030832;GO:0016601;GO:0036336;GO:0051764;GO:0051016;GO:…	positive regulation of signal transduction;barbed-end actin filament capping;actin filament bundle assembly;barbed-end actin filament capping;actin filament bundle assembly;positive regulation of signal transduction;regulation of cell shape;signal transduction;actin filament bundle assembly;cell proliferation;exit from mitosis;actin polymerization-dependent cell motility;epidermal growth factor r…	GO:0003779;GO:0035591;GO:0005515;GO:0003779;GO:0035591;GO:0003779;GO:0005515;GO:0005070;GO:0048365;GO:0005515;GO:0003779;GO:0035591;GO:0005515;GO:0003779;GO:0035591;GO:0003779;GO:0005515;GO:0005070;GO:0048365;GO:0005515;GO:0003779;GO:0035591;GO:0005515;GO:0003779;GO:0035591;GO:0005515;GO:0003779;GO:0035591;GO:0005515;GO:0003779;GO:0035591;GO:0005515;GO:0003779;GO:0035591;GO:0005515;GO:0003779;GO:…	actin binding;signaling adaptor activity;protein binding;actin binding;signaling adaptor activity;actin binding;protein binding;SH3/SH2 adaptor activity;Rac GTPase binding;protein binding;actin binding;signaling adaptor activity;protein binding;actin binding;signaling adaptor activity;actin binding;protein binding;SH3/SH2 adaptor activity;Rac GTPase binding;protein binding;actin binding;signaling…	GO:0005737;GO:0016020;GO:0005886;GO:0042995;GO:0030054;GO:0045202;GO:0030426;GO:0070062;GO:0005938;GO:0005938;GO:0032587;GO:0032587;GO:0032420;GO:0032420;GO:0043005;GO:0031982;GO:0005737;GO:0016020;GO:0005886;GO:0042995;GO:0030054;GO:0045202;GO:0030426;GO:0070062;GO:0005938;GO:0005938;GO:0032587;GO:0032587;GO:0032420;GO:0032420;GO:0043005;GO:0031982;GO:0005938;GO:0032587;GO:0032420;GO:0005903;GO:…	cytoplasm;membrane;plasma membrane;cell projection;cell junction;synapse;growth cone;extracellular exosome;cell cortex;cell cortex;ruffle membrane;ruffle membrane;stereocilium;stereocilium;neuron projection;vesicle;cytoplasm;membrane;plasma membrane;cell projection;cell junction;synapse;growth cone;extracellular exosome;cell cortex;cell cortex;ruffle membrane;ruffle membrane;stereocilium;stereoci…
ADPRHL1	5.92165	2.566	9.49764e-29	2.45524e-26	ADPRHL1	GO:0006886;GO:0031338;GO:0090630;GO:0051725;GO:0051725;GO:0006886;GO:0031338;GO:0090630	intracellular protein transport;regulation of vesicle fusion;activation of GTPase activity;protein de-ADP-ribosylation;protein de-ADP-ribosylation;intracellular protein transport;regulation of vesicle fusion;activation of GTPase activity	GO:0000287;GO:0016787;GO:0005096;GO:0017137;GO:0003875;GO:0000287;GO:0003875;GO:0016787;GO:0005096;GO:0017137	magnesium ion binding;hydrolase activity;GTPase activator activity;Rab GTPase binding;ADP-ribosylarginine hydrolase activity;magnesium ion binding;ADP-ribosylarginine hydrolase activity;hydrolase activity;GTPase activator activity;Rab GTPase binding	GO:0005622;GO:0012505;GO:0005622;GO:0012505	intracellular;endomembrane system;intracellular;endomembrane system
FLVCR2	14.6924	3.877	1.75615e-28	4.44904e-26	FLVCR2	GO:0055085;GO:0015886;GO:0055085;GO:0015886	transmembrane transport;heme transport;transmembrane transport;heme transport	GO:0020037;GO:0015232;GO:0020037;GO:0015232	heme binding;heme transporter activity;heme binding;heme transporter activity	GO:0016021;GO:0016020;GO:0005886;GO:0016021;GO:0016020;GO:0005886;GO:0016020;GO:0016021;GO:0016020;GO:0016021;GO:0016020;GO:0016021;GO:0016020;GO:0016021;GO:0016020;GO:0016021	integral component of membrane;membrane;plasma membrane;integral component of membrane;membrane;plasma membrane;membrane;integral component of membrane;membrane;integral component of membrane;membrane;integral component of membrane;membrane;integral component of membrane;membrane;integral component of membrane
TNFRSF9	0.181747	-2.46	4.2515e-28	1.05596e-25	TNFRSF9	GO:0006915;GO:0008285;GO:0006955;GO:0006954;GO:0097190;GO:0033209;GO:0007275;GO:0032496;GO:0042127;GO:0042981;GO:0008285;GO:0006915;GO:0006915;GO:0008285;GO:0006955;GO:0006954;GO:0097190;GO:0033209;GO:0007275;GO:0032496;GO:0042127;GO:0042981;GO:0008285;GO:0006915;GO:0042127;GO:0070207;GO:2001180;GO:2001183	apoptotic process;negative regulation of cell proliferation;immune response;inflammatory response;apoptotic signaling pathway;tumor necrosis factor-mediated signaling pathway;multicellular organism development;response to lipopolysaccharide;regulation of cell proliferation;regulation of apoptotic process;negative regulation of cell proliferation;apoptotic process;apoptotic process;negative regula…	GO:0005515;GO:0004872;GO:0004872;GO:0005031;GO:0005515;GO:0004872;GO:0004872;GO:0005031;GO:0019955	protein binding;receptor activity;receptor activity;tumor necrosis factor-activated receptor activity;protein binding;receptor activity;receptor activity;tumor necrosis factor-activated receptor activity;cytokine binding	GO:0009897;GO:0016020;GO:0016021;GO:0005886;GO:0005887;GO:0016020;GO:0016021;GO:0009897;GO:0016020;GO:0016021;GO:0005886;GO:0005887;GO:0005615	external side of plasma membrane;membrane;integral component of membrane;plasma membrane;integral component of plasma membrane;membrane;integral component of membrane;external side of plasma membrane;membrane;integral component of membrane;plasma membrane;integral component of plasma membrane;extracellular space
EMP1	3.93947	1.978	4.8286e-28	1.17623e-25	EMP1	GO:0016049;GO:0007275;GO:0008283;GO:0008219;GO:0008544;GO:0032060;GO:0016049;GO:0016049;GO:0016049;GO:0016049;GO:0007275;GO:0008283;GO:0008219;GO:0008544;GO:0032060;GO:0016049	cell growth;multicellular organism development;cell proliferation;cell death;epidermis development;bleb assembly;cell growth;cell growth;cell growth;cell growth;multicellular organism development;cell proliferation;cell death;epidermis development;bleb assembly;cell growth	GO:0005515;GO:0005515	protein binding;protein binding	GO:0016021;GO:0016020;GO:0005886;GO:0005886;GO:0016021;GO:0016020;GO:0016021;GO:0016020;GO:0016021;GO:0016020;GO:0016021;GO:0016020;GO:0016021;GO:0016020;GO:0005886;GO:0016021;GO:0016020;GO:0016021;GO:0016020	integral component of membrane;membrane;plasma membrane;plasma membrane;integral component of membrane;membrane;integral component of membrane;membrane;integral component of membrane;membrane;integral component of membrane;membrane;integral component of membrane;membrane;plasma membrane;integral component of membrane;membrane;integral component of membrane;membrane
IFNGR1	3.12748	1.645	2.72688e-27	6.51725e-25	IFNGR1	GO:0007165;GO:0009615;GO:0060333;GO:0060334	signal transduction;response to virus;interferon-gamma-mediated signaling pathway;regulation of interferon-gamma-mediated signaling pathway	GO:0005515;GO:0019955;GO:0005515;GO:0004906;GO:0005515;GO:0019955;GO:0005515;GO:0019955;GO:0005515;GO:0019955;GO:0005515;GO:0019955;GO:0005515;GO:0019955;GO:0005515;GO:0019955;GO:0005515;GO:0019955;GO:0005515;GO:0019955	protein binding;cytokine binding;protein binding;interferon-gamma receptor activity;protein binding;cytokine binding;protein binding;cytokine binding;protein binding;cytokine binding;protein binding;cytokine binding;protein binding;cytokine binding;protein binding;cytokine binding;protein binding;cytokine binding;protein binding;cytokine binding	GO:0016020;GO:0016021;GO:0005886;GO:0005886;GO:0005887;GO:0016020;GO:0016020;GO:0016020;GO:0016020;GO:0016020;GO:0016020;GO:0016020;GO:0016020	membrane;integral component of membrane;plasma membrane;plasma membrane;integral component of plasma membrane;membrane;membrane;membrane;membrane;membrane;membrane;membrane;membrane
SGK1	3.75288	1.908	2.88739e-27	6.77306e-25	SGK1	GO:0006468;GO:0016310;GO:0006915;GO:0035556;GO:0034220;GO:0001558;GO:0006468;GO:0006814;GO:0006974;GO:0007616;GO:0008217;GO:0018105;GO:0030334;GO:0032411;GO:0042127;GO:0042981;GO:0048812;GO:0050790;GO:0051090;GO:0060453;GO:0070294;GO:0006468;GO:0016310;GO:0006915;GO:0035556;GO:0034220;GO:0001558;GO:0006468;GO:0006814;GO:0007616;GO:0008217;GO:0018105;GO:0030334;GO:0032411;GO:0042127;GO:0042981;GO:…	protein phosphorylation;phosphorylation;apoptotic process;intracellular signal transduction;ion transmembrane transport;regulation of cell growth;protein phosphorylation;sodium ion transport;cellular response to DNA damage stimulus;long-term memory;regulation of blood pressure;peptidyl-serine phosphorylation;regulation of cell migration;positive regulation of transporter activity;regulation of ce…	GO:0005524;GO:0004674;GO:0004672;GO:0035091;GO:0000166;GO:0016740;GO:0016301;GO:0005515;GO:0004674;GO:0004674;GO:0004712;GO:0005246;GO:0015459;GO:0017080;GO:0017081;GO:0005524;GO:0004674;GO:0004672;GO:0000166;GO:0016740;GO:0016301;GO:0005515;GO:0004674;GO:0004674;GO:0004712;GO:0005246;GO:0015459;GO:0017080;GO:0017081;GO:0005524;GO:0004674;GO:0004672;GO:0000166;GO:0016740;GO:0016301;GO:0005515;GO:…	ATP binding;protein serine/threonine kinase activity;protein kinase activity;phosphatidylinositol binding;nucleotide binding;transferase activity;kinase activity;protein binding;protein serine/threonine kinase activity;protein serine/threonine kinase activity;protein serine/threonine/tyrosine kinase activity;calcium channel regulator activity;potassium channel regulator activity;sodium channel re…	GO:0005634;GO:0005737;GO:0016607;GO:0016020;GO:0005829;GO:0005783;GO:0005789;GO:0005739;GO:0005886;GO:0005634;GO:0005737;GO:0005829;GO:0005634;GO:0005737;GO:0016607;GO:0016020;GO:0005829;GO:0005783;GO:0005789;GO:0005739;GO:0005886;GO:0005634;GO:0005737;GO:0005829;GO:0005634;GO:0005737;GO:0016607;GO:0016020;GO:0005829;GO:0005783;GO:0005789;GO:0005739;GO:0005886;GO:0005634;GO:0005737;GO:0005829;GO:…	nucleus;cytoplasm;nuclear speck;membrane;cytosol;endoplasmic reticulum;endoplasmic reticulum membrane;mitochondrion;plasma membrane;nucleus;cytoplasm;cytosol;nucleus;cytoplasm;nuclear speck;membrane;cytosol;endoplasmic reticulum;endoplasmic reticulum membrane;mitochondrion;plasma membrane;nucleus;cytoplasm;cytosol;nucleus;cytoplasm;nuclear speck;membrane;cytosol;endoplasmic reticulum;endoplasmic …
GPC4	3.71922	1.895	4.50254e-27	1.03698e-24	GPC4	GO:0009966;GO:0060071;GO:0009653;GO:0001523;GO:0006024;GO:0006027;GO:0030203;GO:0008283	regulation of signal transduction;Wnt signaling pathway, planar cell polarity pathway;anatomical structure morphogenesis;retinoid metabolic process;glycosaminoglycan biosynthetic process;glycosaminoglycan catabolic process;glycosaminoglycan metabolic process;cell proliferation	GO:0043395;GO:1904929	heparan sulfate proteoglycan binding;coreceptor activity involved in Wnt signaling pathway, planar cell polarity pathway	GO:0016020;GO:0005578;GO:0046658;GO:0005634;GO:0005886;GO:0005576;GO:0005615;GO:0005886;GO:0031225;GO:0070062;GO:0005887;GO:0043202;GO:0005796;GO:0009897	membrane;proteinaceous extracellular matrix;anchored component of plasma membrane;nucleus;plasma membrane;extracellular region;extracellular space;plasma membrane;anchored component of membrane;extracellular exosome;integral component of plasma membrane;lysosomal lumen;Golgi lumen;external side of plasma membrane
TEF	0.208338	-2.263	8.03941e-27	1.81849e-24	TEF	GO:0006355;GO:0006357;GO:0006366;GO:0006351;GO:0048511;GO:0007275;GO:0006357;GO:0006355;GO:0006357;GO:0006366;GO:0006351;GO:0048511;GO:0007275;GO:0006357;GO:0045944;GO:0006357	regulation of transcription, DNA-templated;regulation of transcription from RNA polymerase II promoter;transcription from RNA polymerase II promoter;transcription, DNA-templated;rhythmic process;multicellular organism development;regulation of transcription from RNA polymerase II promoter;regulation of transcription, DNA-templated;regulation of transcription from RNA polymerase II promoter;transc…	GO:0003700;GO:0043565;GO:0003677;GO:0005515;GO:0000981;GO:0000981;GO:0001077;GO:0000977;GO:0003700;GO:0043565;GO:0003677;GO:0005515;GO:0000981;GO:0000981;GO:0001077;GO:0000977;GO:0003690;GO:0043565	DNA binding transcription factor activity;sequence-specific DNA binding;DNA binding;protein binding;RNA polymerase II transcription factor activity, sequence-specific DNA binding;RNA polymerase II transcription factor activity, sequence-specific DNA binding;transcriptional activator activity, RNA polymerase II proximal promoter sequence-specific DNA binding;RNA polymerase II regulatory region seq…	GO:0005634;GO:0005634;GO:0005634;GO:0005634;GO:0005634	nucleus;nucleus;nucleus;nucleus;nucleus
ZFP36	3.2154	1.685	1.17452e-26	2.61011e-24	ZFP36	GO:0000122;GO:0000165;GO:0000288;GO:0000289;GO:0006357;GO:0009611;GO:0035278;GO:0035556;GO:0038066;GO:0043488;GO:0044344;GO:0045085;GO:0045600;GO:0045638;GO:0050728;GO:0050779;GO:0060213;GO:0061014;GO:0061158;GO:0071222;GO:0071356;GO:1900153;GO:1904246	negative regulation of transcription from RNA polymerase II promoter;MAPK cascade;nuclear-transcribed mRNA catabolic process, deadenylation-dependent decay;nuclear-transcribed mRNA poly(A) tail shortening;regulation of transcription from RNA polymerase II promoter;response to wounding;miRNA mediated inhibition of translation;intracellular signal transduction;p38MAPK cascade;regulation of mRNA sta…	GO:0046872;GO:0005515;GO:0003729;GO:0017091;GO:0035925;GO:0070063;GO:0071889;GO:0046872;GO:0046872	metal ion binding;protein binding;mRNA binding;AU-rich element binding;mRNA 3'-UTR AU-rich region binding;RNA polymerase binding;14-3-3 protein binding;metal ion binding;metal ion binding	GO:0005634;GO:0005737;GO:0005829;GO:0030014;GO:0030529;GO:1990904	nucleus;cytoplasm;cytosol;CCR4-NOT complex;intracellular ribonucleoprotein complex;ribonucleoprotein complex
SLIT2	0.358986	-1.478	2.54097e-26	5.54939e-24	SLIT2	GO:0007275;GO:0030154;GO:0006935;GO:0007399;GO:0071672;GO:0043065;GO:0001933;GO:0007411;GO:0043116;GO:0034260;GO:0010596;GO:0007411;GO:0002042;GO:0090288;GO:0030336;GO:0030336;GO:0048754;GO:0048754;GO:0030308;GO:0090027;GO:0008045;GO:0048846;GO:0050919;GO:0050919;GO:0032870;GO:0035385;GO:0035385;GO:0051414;GO:0061364;GO:0070100;GO:0001657;GO:0002689;GO:0010593;GO:0014912;GO:0021836;GO:0021972;GO:…	multicellular organism development;cell differentiation;chemotaxis;nervous system development;negative regulation of smooth muscle cell chemotaxis;positive regulation of apoptotic process;negative regulation of protein phosphorylation;axon guidance;negative regulation of vascular permeability;negative regulation of GTPase activity;negative regulation of endothelial cell migration;axon guidance;ce…	GO:0005515;GO:0005509;GO:0042803;GO:0005515;GO:0005509;GO:0042802;GO:0008201;GO:0008201;GO:0048495;GO:0005095;GO:0043237;GO:0043394;GO:0005515;GO:0005509;GO:0042803;GO:0005515;GO:0005509;GO:0042802;GO:0008201;GO:0008201;GO:0048495;GO:0005095;GO:0043237;GO:0043394;GO:0005515;GO:0005509;GO:0005515;GO:0005509;GO:0042803;GO:0005515;GO:0005509;GO:0042802;GO:0008201;GO:0008201;GO:0048495;GO:0005095;GO:…	protein binding;calcium ion binding;protein homodimerization activity;protein binding;calcium ion binding;identical protein binding;heparin binding;heparin binding;Roundabout binding;GTPase inhibitor activity;laminin-1 binding;proteoglycan binding;protein binding;calcium ion binding;protein homodimerization activity;protein binding;calcium ion binding;identical protein binding;heparin binding;hep…	GO:0005737;GO:0016020;GO:0005576;GO:0005615;GO:0005576;GO:0005886;GO:0070062;GO:0005737;GO:0016020;GO:0005576;GO:0005615;GO:0005576;GO:0005886;GO:0070062;GO:0005576;GO:0005737;GO:0016020;GO:0005576;GO:0005615;GO:0005576;GO:0005886;GO:0070062;GO:0005576	cytoplasm;membrane;extracellular region;extracellular space;extracellular region;plasma membrane;extracellular exosome;cytoplasm;membrane;extracellular region;extracellular space;extracellular region;plasma membrane;extracellular exosome;extracellular region;cytoplasm;membrane;extracellular region;extracellular space;extracellular region;plasma membrane;extracellular exosome;extracellular region
FOXC2	9.03172	3.175	6.26353e-26	1.34475e-23	FOXC2	GO:0006355;GO:0006366;GO:0006351;GO:0007275;GO:0045893;GO:0010595;GO:0090050;GO:0045944;GO:0035470;GO:0030154;GO:0000122;GO:0008286;GO:0033630;GO:0007498;GO:0009725;GO:0001946;GO:0007507;GO:0000122;GO:0001501;GO:0001503;GO:0001568;GO:0001569;GO:0001656;GO:0001657;GO:0001756;GO:0001822;GO:0001945;GO:0001974;GO:0003007;GO:0007219;GO:0007507;GO:0008283;GO:0010595;GO:0014032;GO:0030199;GO:0033630;GO:…	regulation of transcription, DNA-templated;transcription from RNA polymerase II promoter;transcription, DNA-templated;multicellular organism development;positive regulation of transcription, DNA-templated;positive regulation of endothelial cell migration;positive regulation of cell migration involved in sprouting angiogenesis;positive regulation of transcription from RNA polymerase II promoter;po…	GO:0003700;GO:0043565;GO:0003677;GO:0003700;GO:0031490;GO:0005515;GO:0043565;GO:0042802;GO:0000981;GO:0044212;GO:0001077;GO:1990841;GO:0003705;GO:0044212;GO:1990841	DNA binding transcription factor activity;sequence-specific DNA binding;DNA binding;DNA binding transcription factor activity;chromatin DNA binding;protein binding;sequence-specific DNA binding;identical protein binding;RNA polymerase II transcription factor activity, sequence-specific DNA binding;transcription regulatory region DNA binding;transcriptional activator activity, RNA polymerase II pr…	GO:0005634;GO:0005634;GO:0005654;GO:0016604	nucleus;nucleus;nucleoplasm;nuclear body
NNMT	3.50399	1.809	1.50126e-25	3.1694e-23	NNMT	GO:0032259;GO:0032259;GO:0034356;GO:0010243;GO:0031100;GO:0042493;GO:0032259;GO:0032259;GO:0034356	methylation;methylation;NAD biosynthesis via nicotinamide riboside salvage pathway;response to organonitrogen compound;animal organ regeneration;response to drug;methylation;methylation;NAD biosynthesis via nicotinamide riboside salvage pathway	GO:0008168;GO:0016740;GO:0008112;GO:0008112;GO:0030760;GO:0008168;GO:0016740;GO:0008112;GO:0008112;GO:0030760	methyltransferase activity;transferase activity;nicotinamide N-methyltransferase activity;nicotinamide N-methyltransferase activity;pyridine N-methyltransferase activity;methyltransferase activity;transferase activity;nicotinamide N-methyltransferase activity;nicotinamide N-methyltransferase activity;pyridine N-methyltransferase activity	GO:0005737;GO:0005829;GO:0005829;GO:0005737;GO:0005829	cytoplasm;cytosol;cytosol;cytoplasm;cytosol
FBLN1	3.22657	1.69	6.61996e-25	1.37467e-22	FBLN1	GO:0030198;GO:0010952;GO:0030198;GO:0010952;GO:0016032;GO:0001933;GO:0007162;GO:0070373;GO:1900025;GO:0072378;GO:2000146;GO:2000647;GO:0030198;GO:0010952;GO:0016032;GO:0001933;GO:0007162;GO:0070373;GO:1900025;GO:0072378;GO:2000146;GO:0007566;GO:2000647;GO:0030198;GO:0010952;GO:0016032;GO:0001933;GO:0007162;GO:0070373;GO:1900025;GO:0072378;GO:2000146;GO:2000647;GO:0030198;GO:0010952;GO:0016032;GO:…	extracellular matrix organization;positive regulation of peptidase activity;extracellular matrix organization;positive regulation of peptidase activity;viral process;negative regulation of protein phosphorylation;negative regulation of cell adhesion;negative regulation of ERK1 and ERK2 cascade;negative regulation of substrate adhesion-dependent cell spreading;blood coagulation, fibrin clot format…	GO:0005509;GO:0016504;GO:0005509;GO:0016504;GO:0005509;GO:0001968;GO:0042802;GO:0008022;GO:0044877;GO:0005201;GO:0070051;GO:0005509;GO:0016504;GO:0005509;GO:0001968;GO:0042802;GO:0008022;GO:0044877;GO:0005201;GO:0070051;GO:0005509;GO:0016504;GO:0005509;GO:0001968;GO:0042802;GO:0008022;GO:0044877;GO:0005201;GO:0070051;GO:0005509;GO:0016504;GO:0005509;GO:0001968;GO:0042802;GO:0008022;GO:0044877;GO:…	calcium ion binding;peptidase activator activity;calcium ion binding;peptidase activator activity;calcium ion binding;fibronectin binding;identical protein binding;protein C-terminus binding;macromolecular complex binding;extracellular matrix structural constituent;fibrinogen binding;calcium ion binding;peptidase activator activity;calcium ion binding;fibronectin binding;identical protein binding…	GO:0005576;GO:0005576;GO:0005576;GO:0005578;GO:0005576;GO:0005576;GO:0005578;GO:0005578;GO:0005615;GO:0005576;GO:0070062;GO:0031012;GO:0005576;GO:0005577;GO:0071953;GO:0005576;GO:0005576;GO:0005578;GO:0005578;GO:0005615;GO:0005576;GO:0070062;GO:0031012;GO:0005576;GO:0005577;GO:0071953;GO:0005604;GO:0005615;GO:0005576;GO:0005576;GO:0005578;GO:0005578;GO:0005615;GO:0005576;GO:0070062;GO:0031012;GO:…	extracellular region;extracellular region;extracellular region;proteinaceous extracellular matrix;extracellular region;extracellular region;proteinaceous extracellular matrix;proteinaceous extracellular matrix;extracellular space;extracellular region;extracellular exosome;extracellular matrix;extracellular region;fibrinogen complex;elastic fiber;extracellular region;extracellular region;proteinac…
DAAM2	5.7041	2.512	6.74116e-25	1.37726e-22	DAAM2	GO:0030036;GO:0016043;GO:0030036;GO:0016043;GO:0016055;GO:0090263;GO:0060828;GO:0048715;GO:0021516;GO:2000050;GO:0030036;GO:0030036;GO:0016043;GO:0016055;GO:0090263;GO:0060828;GO:0048715;GO:0007368;GO:0021516;GO:0021516;GO:0048715;GO:0060828;GO:0090263;GO:2000050;GO:2000050;GO:0030036;GO:0016043;GO:0016055;GO:0090263;GO:0060828;GO:0048715;GO:0021516;GO:2000050;GO:0030036	actin cytoskeleton organization;cellular component organization;actin cytoskeleton organization;cellular component organization;Wnt signaling pathway;positive regulation of canonical Wnt signaling pathway;regulation of canonical Wnt signaling pathway;negative regulation of oligodendrocyte differentiation;dorsal spinal cord development;regulation of non-canonical Wnt signaling pathway;actin cytosk…	GO:0003779;GO:0017048;GO:0005488;GO:0003779;GO:0017048;GO:0005488;GO:0003779;GO:0017048;GO:0003779;GO:0017048;GO:0005488;GO:0003779;GO:0017048;GO:0005488;GO:0003779;GO:0017048;GO:0005488	actin binding;Rho GTPase binding;binding;actin binding;Rho GTPase binding;binding;actin binding;Rho GTPase binding;actin binding;Rho GTPase binding;binding;actin binding;Rho GTPase binding;binding;actin binding;Rho GTPase binding;binding	GO:0070062;GO:0070062;GO:0070062	extracellular exosome;extracellular exosome;extracellular exosome
SLAMF8	13.2599	3.729	8.42997e-25	1.69496e-22	SLAMF8	NA	NA	NA	NA	GO:0016020;GO:0016021;GO:0016020;GO:0016021	membrane;integral component of membrane;membrane;integral component of membrane
AK5	0.299785	-1.738	9.06647e-25	1.79445e-22	AK5	GO:0006139;GO:0016310;GO:0006139;GO:0016310;GO:0006139;GO:0016310;GO:0006139;GO:0046034;GO:0016310;GO:0015949;GO:0006165;GO:0009142;GO:0009220;GO:0006172;GO:0006173;GO:0006139;GO:0046034;GO:0016310;GO:0015949;GO:0006165;GO:0009142;GO:0009220;GO:0006172;GO:0006173	nucleobase-containing compound metabolic process;phosphorylation;nucleobase-containing compound metabolic process;phosphorylation;nucleobase-containing compound metabolic process;phosphorylation;nucleobase-containing compound metabolic process;ATP metabolic process;phosphorylation;nucleobase-containing small molecule interconversion;nucleoside diphosphate phosphorylation;nucleoside triphosphate b…	GO:0005524;GO:0019205;GO:0005524;GO:0019205;GO:0005524;GO:0019205;GO:0016740;GO:0016301;GO:0005524;GO:0019205;GO:0004017;GO:0000166;GO:0016740;GO:0016301;GO:0004550;GO:0004550;GO:0019206;GO:0004017;GO:0005524;GO:0019205;GO:0004017;GO:0000166;GO:0016740;GO:0016301;GO:0004550;GO:0004550;GO:0019206;GO:0004017	ATP binding;nucleobase-containing compound kinase activity;ATP binding;nucleobase-containing compound kinase activity;ATP binding;nucleobase-containing compound kinase activity;transferase activity;kinase activity;ATP binding;nucleobase-containing compound kinase activity;adenylate kinase activity;nucleotide binding;transferase activity;kinase activity;nucleoside diphosphate kinase activity;nucle…	GO:0005737;GO:0005829;GO:0005815;GO:0005829;GO:0005737;GO:0005829;GO:0005815;GO:0005829	cytoplasm;cytosol;microtubule organizing center;cytosol;cytoplasm;cytosol;microtubule organizing center;cytosol
CADM1	0.209352	-2.256	1.53942e-24	2.99998e-22	CADM1	GO:0007155;GO:0006915;GO:0007275;GO:0030154;GO:0002376;GO:0007283;GO:0007156;GO:0007156;GO:0007157;GO:0008037;GO:0008037;GO:0045954;GO:0045954;GO:0034332;GO:0007157;GO:0050715;GO:0042271;GO:0042271;GO:0051606;GO:0051606;GO:0007155;GO:0006915;GO:0007275;GO:0030154;GO:0002376;GO:0007283;GO:0007156;GO:0007156;GO:0007157;GO:0008037;GO:0008037;GO:0045954;GO:0045954;GO:0034332;GO:0007157;GO:0050715;GO:…	cell adhesion;apoptotic process;multicellular organism development;cell differentiation;immune system process;spermatogenesis;homophilic cell adhesion via plasma membrane adhesion molecules;homophilic cell adhesion via plasma membrane adhesion molecules;heterophilic cell-cell adhesion via plasma membrane cell adhesion molecules;cell recognition;cell recognition;positive regulation of natural kill…	GO:0042803;GO:0005515;GO:0005102;GO:0005102;GO:0030165;GO:0004872;GO:0042803;GO:0050839;GO:0042803;GO:0005515;GO:0005102;GO:0005102;GO:0030165;GO:0004872;GO:0042803;GO:0050839;GO:0042803;GO:0005515;GO:0005102;GO:0005102;GO:0030165;GO:0004872;GO:0042803;GO:0050839;GO:0042803;GO:0005515;GO:0005102;GO:0005102;GO:0030165;GO:0004872;GO:0042803;GO:0050839	protein homodimerization activity;protein binding;receptor binding;receptor binding;PDZ domain binding;receptor activity;protein homodimerization activity;cell adhesion molecule binding;protein homodimerization activity;protein binding;receptor binding;receptor binding;PDZ domain binding;receptor activity;protein homodimerization activity;cell adhesion molecule binding;protein homodimerization ac…	GO:0016020;GO:0016021;GO:0005886;GO:0005886;GO:0030054;GO:0045202;GO:0005886;GO:0005887;GO:0070062;GO:0016323;GO:0005911;GO:0005913;GO:0016020;GO:0016021;GO:0005886;GO:0005886;GO:0030054;GO:0045202;GO:0005886;GO:0005887;GO:0070062;GO:0016323;GO:0005911;GO:0005913;GO:0016020;GO:0016021;GO:0005886;GO:0005886;GO:0030054;GO:0045202;GO:0005886;GO:0005887;GO:0070062;GO:0016323;GO:0005911;GO:0005913;GO:…	membrane;integral component of membrane;plasma membrane;plasma membrane;cell junction;synapse;plasma membrane;integral component of plasma membrane;extracellular exosome;basolateral plasma membrane;cell-cell junction;cell-cell adherens junction;membrane;integral component of membrane;plasma membrane;plasma membrane;cell junction;synapse;plasma membrane;integral component of plasma membrane;extrac…
TNS2	2.83628	1.504	1.77424e-24	3.4052e-22	TNS2	GO:0035556;GO:0006470;GO:0008285;GO:0035556;GO:0006470;GO:0008285;GO:0001822;GO:0014850;GO:0019725;GO:0032963;GO:0035264;GO:0048871;GO:0035556;GO:0006470;GO:0008285;GO:0035556;GO:0006470;GO:0008285;GO:0035556;GO:0006470;GO:0008285;GO:0035556	intracellular signal transduction;protein dephosphorylation;negative regulation of cell proliferation;intracellular signal transduction;protein dephosphorylation;negative regulation of cell proliferation;kidney development;response to muscle activity;cellular homeostasis;collagen metabolic process;multicellular organism growth;multicellular organismal homeostasis;intracellular signal transduction…	GO:0005515;GO:0046872;GO:0016787;GO:0004721;GO:0005515;GO:0019900;GO:0005515;GO:0046872;GO:0016787;GO:0004721;GO:0005515;GO:0019900;GO:0005515;GO:0046872;GO:0016787;GO:0004721;GO:0005515;GO:0019900;GO:0005515;GO:0046872;GO:0016787;GO:0004721;GO:0005515;GO:0019900;GO:0005515;GO:0046872;GO:0016787;GO:0004721;GO:0005515;GO:0019900;GO:0005515;GO:0046872	protein binding;metal ion binding;hydrolase activity;phosphoprotein phosphatase activity;protein binding;kinase binding;protein binding;metal ion binding;hydrolase activity;phosphoprotein phosphatase activity;protein binding;kinase binding;protein binding;metal ion binding;hydrolase activity;phosphoprotein phosphatase activity;protein binding;kinase binding;protein binding;metal ion binding;hydro…	GO:0016020;GO:0005622;GO:0005886;GO:0030054;GO:0005925;GO:0005925;GO:0005925;GO:0016020;GO:0005622;GO:0005886;GO:0030054;GO:0005925;GO:0005925;GO:0005925;GO:0016020;GO:0005622;GO:0005886;GO:0030054;GO:0005925;GO:0005925;GO:0005925;GO:0016020;GO:0005622;GO:0005886;GO:0030054;GO:0005925;GO:0005925;GO:0005925;GO:0016020;GO:0005622;GO:0005886;GO:0030054;GO:0005925;GO:0005925;GO:0005925;GO:0005622	membrane;intracellular;plasma membrane;cell junction;focal adhesion;focal adhesion;focal adhesion;membrane;intracellular;plasma membrane;cell junction;focal adhesion;focal adhesion;focal adhesion;membrane;intracellular;plasma membrane;cell junction;focal adhesion;focal adhesion;focal adhesion;membrane;intracellular;plasma membrane;cell junction;focal adhesion;focal adhesion;focal adhesion;membran…
TGFBR3	3.1145	1.639	5.0377e-24	9.52426e-22	TGFBR3	GO:0007179;GO:0007179;GO:0007179;GO:0060045;GO:0060412;GO:0003151;GO:0050680;GO:0030509;GO:0034695;GO:0060021;GO:0055010;GO:0060389;GO:0003007;GO:0016477;GO:0006955;GO:0001837;GO:0035556;GO:0001889;GO:0060347;GO:0060317;GO:0003223;GO:0061384;GO:0051271;GO:0060979;GO:0003150;GO:0032354;GO:0034699;GO:0060038;GO:0060216;GO:0060318;GO:0060939;GO:0007179;GO:0007179;GO:0007179;GO:0060045;GO:0060412;GO:…	transforming growth factor beta receptor signaling pathway;transforming growth factor beta receptor signaling pathway;transforming growth factor beta receptor signaling pathway;positive regulation of cardiac muscle cell proliferation;ventricular septum morphogenesis;outflow tract morphogenesis;negative regulation of epithelial cell proliferation;BMP signaling pathway;response to prostaglandin E;p…	GO:0005515;GO:0015026;GO:0046332;GO:0030165;GO:0008201;GO:0005114;GO:0050431;GO:0050431;GO:0005539;GO:0005539;GO:0005024;GO:0005160;GO:0070123;GO:0005515;GO:0015026;GO:0046332;GO:0030165;GO:0008201;GO:0005114;GO:0050431;GO:0050431;GO:0005539;GO:0005539;GO:0005024;GO:0005160;GO:0070123;GO:0005515;GO:0015026;GO:0046332;GO:0030165;GO:0008201;GO:0005114;GO:0050431;GO:0050431;GO:0005539;GO:0005539;GO:…	protein binding;coreceptor activity;SMAD binding;PDZ domain binding;heparin binding;type II transforming growth factor beta receptor binding;transforming growth factor beta binding;transforming growth factor beta binding;glycosaminoglycan binding;glycosaminoglycan binding;transforming growth factor beta-activated receptor activity;transforming growth factor beta receptor binding;transforming grow…	GO:0016020;GO:0016021;GO:0005886;GO:0005576;GO:0005615;GO:0005615;GO:0005615;GO:0070062;GO:0009986;GO:0009897;GO:0043235;GO:0005887;GO:0034673;GO:0016020;GO:0016021;GO:0005886;GO:0005576;GO:0005615;GO:0005615;GO:0005615;GO:0070062;GO:0009986;GO:0009897;GO:0043235;GO:0005887;GO:0034673;GO:0016020;GO:0016021;GO:0005886;GO:0005576;GO:0005615;GO:0005615;GO:0005615;GO:0070062;GO:0009986;GO:0009897;GO:…	membrane;integral component of membrane;plasma membrane;extracellular region;extracellular space;extracellular space;extracellular space;extracellular exosome;cell surface;external side of plasma membrane;receptor complex;integral component of plasma membrane;inhibin-betaglycan-ActRII complex;membrane;integral component of membrane;plasma membrane;extracellular region;extracellular space;extracel…
ADAMTS7	3.23104	1.692	5.52088e-24	1.02843e-21	ADAMTS7	GO:0006508;GO:0071356;GO:0071773;GO:0032331;GO:0051603;GO:0036066;GO:0071347	proteolysis;cellular response to tumor necrosis factor;cellular response to BMP stimulus;negative regulation of chondrocyte differentiation;proteolysis involved in cellular protein catabolic process;protein O-linked fucosylation;cellular response to interleukin-1	GO:0004222;GO:0008233;GO:0008237;GO:0046872;GO:0016787;GO:0005515;GO:0008237;GO:0004222	metalloendopeptidase activity;peptidase activity;metallopeptidase activity;metal ion binding;hydrolase activity;protein binding;metallopeptidase activity;metalloendopeptidase activity	GO:0005576;GO:0005578;GO:0005788;GO:0005615;GO:0009986	extracellular region;proteinaceous extracellular matrix;endoplasmic reticulum lumen;extracellular space;cell surface
DRD2	0.206899	-2.273	9.15046e-24	1.67984e-21	DRD2	GO:0007186;GO:0007212;GO:0007195;GO:0007165;GO:0008285;GO:0051898;GO:0050709;GO:0051898;GO:0030336;GO:0002027;GO:0007186;GO:0051209;GO:0032922;GO:0032467;GO:0060134;GO:0001659;GO:0042493;GO:0021984;GO:0060124;GO:0050482;GO:0007626;GO:0001963;GO:0007194;GO:0009636;GO:0014059;GO:0043266;GO:0048148;GO:0048149;GO:0051481;GO:0051967;GO:1901386;GO:0007409;GO:0001975;GO:0001976;GO:0002028;GO:0002052;GO:…	G-protein coupled receptor signaling pathway;dopamine receptor signaling pathway;adenylate cyclase-inhibiting dopamine receptor signaling pathway;signal transduction;negative regulation of cell proliferation;negative regulation of protein kinase B signaling;negative regulation of protein secretion;negative regulation of protein kinase B signaling;negative regulation of cell migration;regulation o…	GO:0004930;GO:0004952;GO:0005515;GO:0004871;GO:0042802;GO:0008144;GO:0035240;GO:0001591;GO:0004930;GO:0004952;GO:0005515;GO:0004871;GO:0001591;GO:0005102;GO:0008144;GO:0035240;GO:0035255;GO:0042803;GO:0046982;GO:0042802;GO:0008144;GO:0035240;GO:0001591;GO:0004930;GO:0004952;GO:0004871;GO:0004930;GO:0004952;GO:0005515;GO:0004871;GO:0042802;GO:0008144;GO:0035240;GO:0001591;GO:0004930;GO:0004952;GO:…	G-protein coupled receptor activity;dopamine neurotransmitter receptor activity;protein binding;signal transducer activity;identical protein binding;drug binding;dopamine binding;dopamine neurotransmitter receptor activity, coupled via Gi/Go;G-protein coupled receptor activity;dopamine neurotransmitter receptor activity;protein binding;signal transducer activity;dopamine neurotransmitter receptor…	GO:0016021;GO:0005887;GO:0016020;GO:0005886;GO:0005886;GO:0030672;GO:0030424;GO:0005887;GO:0030425;GO:0005886;GO:0060170;GO:0097730;GO:0016021;GO:0005887;GO:0016020;GO:0005886;GO:0001669;GO:0014069;GO:0016328;GO:0030139;GO:0030424;GO:0030425;GO:0030672;GO:0031410;GO:0036126;GO:0043197;GO:0043204;GO:0043679;GO:0005886;GO:0030672;GO:0030424;GO:0005887;GO:0030425;GO:0005886;GO:0060170;GO:0097730;GO:…	integral component of membrane;integral component of plasma membrane;membrane;plasma membrane;plasma membrane;synaptic vesicle membrane;axon;integral component of plasma membrane;dendrite;plasma membrane;ciliary membrane;non-motile cilium;integral component of membrane;integral component of plasma membrane;membrane;plasma membrane;acrosomal vesicle;postsynaptic density;lateral plasma membrane;end…
IGFBP3	0.259535	-1.946	1.03433e-23	1.8717e-21	IGFBP3	GO:0001558;GO:0006915;GO:0043666;GO:0048662;GO:0044267;GO:0043687;GO:0043065;GO:0042981;GO:0009968;GO:0006468;GO:0014912;GO:0043567;GO:0008285;GO:0045663;GO:0001933;GO:0001558;GO:0006915;GO:0043666;GO:0048662;GO:0044267;GO:0043687;GO:0043065;GO:0042981;GO:0009968;GO:0006468;GO:0014912;GO:0043567;GO:0008285;GO:0045663;GO:0001649;GO:0001933;GO:0010906;GO:0040008;GO:0043410;GO:0043568;GO:0044342;GO:…	regulation of cell growth;apoptotic process;regulation of phosphoprotein phosphatase activity;negative regulation of smooth muscle cell proliferation;cellular protein metabolic process;post-translational protein modification;positive regulation of apoptotic process;regulation of apoptotic process;negative regulation of signal transduction;protein phosphorylation;negative regulation of smooth musc…	GO:0005520;GO:0005520;GO:0046872;GO:0005515;GO:0019838;GO:0031994;GO:0005520;GO:0001968;GO:0008160;GO:0031995;GO:0005520;GO:0046872;GO:0005515;GO:0019838;GO:0031994;GO:0005520;GO:0001968;GO:0001968;GO:0008160;GO:0031995;GO:0005520;GO:0005520;GO:0005520;GO:0005520;GO:0005520	insulin-like growth factor binding;insulin-like growth factor binding;metal ion binding;protein binding;growth factor binding;insulin-like growth factor I binding;insulin-like growth factor binding;fibronectin binding;protein tyrosine phosphatase activator activity;insulin-like growth factor II binding;insulin-like growth factor binding;metal ion binding;protein binding;growth factor binding;insu…	GO:0005576;GO:0005576;GO:0005576;GO:0005576;GO:0005615;GO:0070062;GO:0005634;GO:0005788;GO:0016942;GO:0042567;GO:0005576;GO:0005576;GO:0005576;GO:0005615;GO:0070062;GO:0005634;GO:0005788;GO:0016942;GO:0042567;GO:0005615;GO:0005576;GO:0005576;GO:0005576;GO:0005576;GO:0005576	extracellular region;extracellular region;extracellular region;extracellular region;extracellular space;extracellular exosome;nucleus;endoplasmic reticulum lumen;insulin-like growth factor binding protein complex;insulin-like growth factor ternary complex;extracellular region;extracellular region;extracellular region;extracellular space;extracellular exosome;nucleus;endoplasmic reticulum lumen;in…
ALDH1A3	0.358489	-1.48	1.74348e-23	3.11051e-21	ALDH1A3	GO:0055114;GO:0008152;GO:0055114;GO:0008152;GO:0002072;GO:0002138;GO:0007626;GO:0021768;GO:0031076;GO:0042472;GO:0042573;GO:0043065;GO:0043584;GO:0048048;GO:0050885;GO:0060013;GO:0060166;GO:0060324;GO:0070384;GO:0051289;GO:0042573;GO:0042572;GO:0048048;GO:0042574;GO:0002138;GO:0031076;GO:0055114;GO:0008152;GO:0055114;GO:0008152	oxidation-reduction process;metabolic process;oxidation-reduction process;metabolic process;optic cup morphogenesis involved in camera-type eye development;retinoic acid biosynthetic process;locomotory behavior;nucleus accumbens development;embryonic camera-type eye development;inner ear morphogenesis;retinoic acid metabolic process;positive regulation of apoptotic process;nose development;embryo…	GO:0016491;GO:0016491;GO:0042803;GO:0016620;GO:0004029;GO:0004030;GO:0070324;GO:0070403;GO:0004029;GO:0001758;GO:0001758;GO:0004030;GO:0016491;GO:0016491;GO:0016620	oxidoreductase activity;oxidoreductase activity;protein homodimerization activity;oxidoreductase activity, acting on the aldehyde or oxo group of donors, NAD or NADP as acceptor;aldehyde dehydrogenase (NAD) activity;aldehyde dehydrogenase [NAD(P)+] activity;thyroid hormone binding;NAD+ binding;aldehyde dehydrogenase (NAD) activity;retinal dehydrogenase activity;retinal dehydrogenase activity;alde…	GO:0005634;GO:0005829;GO:0005737;GO:0005737;GO:0005634;GO:0005829;GO:0005886;GO:0005829;GO:0070062;GO:0005634;GO:0005829;GO:0005886	nucleus;cytosol;cytoplasm;cytoplasm;nucleus;cytosol;plasma membrane;cytosol;extracellular exosome;nucleus;cytosol;plasma membrane
CDH6	0.345798	-1.532	1.87949e-23	3.3066e-21	CDH6	GO:0007156;GO:0007155;GO:0007156;GO:0007155;GO:0007155;GO:0034332;GO:0007219	homophilic cell adhesion via plasma membrane adhesion molecules;cell adhesion;homophilic cell adhesion via plasma membrane adhesion molecules;cell adhesion;cell adhesion;adherens junction organization;Notch signaling pathway	GO:0005509;GO:0005509;GO:0046872	calcium ion binding;calcium ion binding;metal ion binding	GO:0005886;GO:0016020;GO:0016021;GO:0005886;GO:0016020;GO:0016021;GO:0005886;GO:0070062	plasma membrane;membrane;integral component of membrane;plasma membrane;membrane;integral component of membrane;plasma membrane;extracellular exosome
PER3	0.226565	-2.142	2.16036e-23	3.74867e-21	PER3	GO:0032922;GO:0032922;GO:0006351;GO:0006355;GO:0048511;GO:0000122;GO:0050821;GO:0045187;GO:0032922;GO:0006351;GO:0006355;GO:0048511;GO:0000122;GO:0050821;GO:0045187;GO:0032922;GO:0006351;GO:0006355;GO:0048511;GO:0000122;GO:0050821;GO:0045187;GO:0000122;GO:0007623;GO:0045187;GO:0032922	circadian regulation of gene expression;circadian regulation of gene expression;transcription, DNA-templated;regulation of transcription, DNA-templated;rhythmic process;negative regulation of transcription from RNA polymerase II promoter;protein stabilization;regulation of circadian sleep/wake cycle, sleep;circadian regulation of gene expression;transcription, DNA-templated;regulation of transcri…	GO:0005515;GO:0005515;GO:0005515;GO:0005515;GO:0005515;GO:0005515;GO:0005515;GO:0019900;GO:0031625;GO:0005515	protein binding;protein binding;protein binding;protein binding;protein binding;protein binding;protein binding;kinase binding;ubiquitin protein ligase binding;protein binding	GO:0005634;GO:0005634;GO:0005737;GO:0005737;GO:0005634;GO:0005634;GO:0005737;GO:0005737;GO:0005634;GO:0005634;GO:0005737;GO:0005737	nucleus;nucleus;cytoplasm;cytoplasm;nucleus;nucleus;cytoplasm;cytoplasm;nucleus;nucleus;cytoplasm;cytoplasm
VIPR1	9.11347	3.188	7.40426e-23	1.26743e-20	VIPR1	GO:0007186;GO:0007166;GO:0007165;GO:0007186;GO:0008284;GO:0007187;GO:0007186;GO:0007186;GO:0007186;GO:0007166;GO:0007165;GO:0007186;GO:0008284;GO:0007187;GO:0007186;GO:0007166;GO:0007165;GO:0007186;GO:0008284;GO:0007187;GO:0007186;GO:0007166;GO:0007165;GO:0007186;GO:0008284;GO:0007187	G-protein coupled receptor signaling pathway;cell surface receptor signaling pathway;signal transduction;G-protein coupled receptor signaling pathway;positive regulation of cell proliferation;G-protein coupled receptor signaling pathway, coupled to cyclic nucleotide second messenger;G-protein coupled receptor signaling pathway;G-protein coupled receptor signaling pathway;G-protein coupled recepto…	GO:0004930;GO:0004999;GO:0004888;GO:0005515;GO:0004871;GO:0017046;GO:0004999;GO:0004999;GO:0004930;GO:0004999;GO:0004930;GO:0004999;GO:0004930;GO:0004999;GO:0004888;GO:0005515;GO:0004871;GO:0017046;GO:0004999;GO:0004999;GO:0004930;GO:0004999;GO:0004888;GO:0005515;GO:0004871;GO:0017046;GO:0004999;GO:0004999;GO:0004930;GO:0004999;GO:0004888;GO:0005515;GO:0004871;GO:0017046;GO:0004999;GO:0004999	G-protein coupled receptor activity;vasoactive intestinal polypeptide receptor activity;transmembrane signaling receptor activity;protein binding;signal transducer activity;peptide hormone binding;vasoactive intestinal polypeptide receptor activity;vasoactive intestinal polypeptide receptor activity;G-protein coupled receptor activity;vasoactive intestinal polypeptide receptor activity;G-protein …	GO:0016021;GO:0016020;GO:0005886;GO:0005886;GO:0005887;GO:0043235;GO:0016020;GO:0016021;GO:0016020;GO:0016021;GO:0016021;GO:0016020;GO:0005886;GO:0005886;GO:0005887;GO:0043235;GO:0016021;GO:0016020;GO:0005886;GO:0005886;GO:0005887;GO:0043235;GO:0016021;GO:0016020;GO:0005886;GO:0005886;GO:0005887;GO:0043235	integral component of membrane;membrane;plasma membrane;plasma membrane;integral component of plasma membrane;receptor complex;membrane;integral component of membrane;membrane;integral component of membrane;integral component of membrane;membrane;plasma membrane;plasma membrane;integral component of plasma membrane;receptor complex;integral component of membrane;membrane;plasma membrane;plasma me…
RHOXF1-AS1	13.6516	3.771	2.56047e-22	4.32447e-20	RHOXF1-AS1	NA	NA	NA	NA	NA	NA
SEMA3A	0.237994	-2.071	1.22782e-21	2.04642e-19	SEMA3A	GO:0007275;GO:0030154;GO:0007399;GO:0001764;GO:0007411;GO:0021675;GO:0048846;GO:0060385;GO:0061549;GO:0071526;GO:0097490;GO:0097491;GO:0150020;GO:0150020;GO:1901166;GO:1902285;GO:0010977;GO:0046330;GO:0048880;GO:0001764;GO:0002027;GO:0006915;GO:0007411;GO:0007413;GO:0008045;GO:0010633;GO:0021612;GO:0021637;GO:0021675;GO:0021772;GO:0021785;GO:0021828;GO:0030517;GO:0036486;GO:0048485;GO:0048813;GO:…	multicellular organism development;cell differentiation;nervous system development;neuron migration;axon guidance;nerve development;axon extension involved in axon guidance;axonogenesis involved in innervation;sympathetic ganglion development;semaphorin-plexin signaling pathway;sympathetic neuron projection extension;sympathetic neuron projection guidance;basal dendrite arborization;basal dendrit…	GO:0005515;GO:0038191;GO:0038191;GO:0030215;GO:0038191;GO:0045499;GO:0045499;GO:0005515;GO:0038191;GO:0038191;GO:0045499;GO:0005515	protein binding;neuropilin binding;neuropilin binding;semaphorin receptor binding;neuropilin binding;chemorepellent activity;chemorepellent activity;protein binding;neuropilin binding;neuropilin binding;chemorepellent activity;protein binding	GO:0005576;GO:0005615;GO:0005576;GO:0030424;GO:0005615;GO:0030424;GO:0030425;GO:0005576;GO:0005615;GO:0005576;GO:0030424	extracellular region;extracellular space;extracellular region;axon;extracellular space;axon;dendrite;extracellular region;extracellular space;extracellular region;axon
PPME1	2.96493	1.568	2.8428e-21	4.67659e-19	PPME1	GO:0006482;GO:0032515;GO:0043666;GO:0000086;GO:0006482;GO:0006482;GO:0006482;GO:0032515;GO:0043666;GO:0000086;GO:0006482;GO:0006482	protein demethylation;negative regulation of phosphoprotein phosphatase activity;regulation of phosphoprotein phosphatase activity;G2/M transition of mitotic cell cycle;protein demethylation;protein demethylation;protein demethylation;negative regulation of phosphoprotein phosphatase activity;regulation of phosphoprotein phosphatase activity;G2/M transition of mitotic cell cycle;protein demethyla…	GO:0051723;GO:0016787;GO:0052689;GO:0045296;GO:0004864;GO:0019888;GO:0051721;GO:0019903;GO:0051722;GO:0051722;GO:0051723;GO:0016787;GO:0052689;GO:0045296;GO:0004864;GO:0019888;GO:0051721;GO:0019901;GO:0019903;GO:0051722;GO:0051722	protein methylesterase activity;hydrolase activity;carboxylic ester hydrolase activity;cadherin binding;protein phosphatase inhibitor activity;protein phosphatase regulator activity;protein phosphatase 2A binding;protein phosphatase binding;protein C-terminal methylesterase activity;protein C-terminal methylesterase activity;protein methylesterase activity;hydrolase activity;carboxylic ester hydr…	GO:0005654;GO:0005654	nucleoplasm;nucleoplasm
ADAM12	0.341747	-1.549	2.91761e-21	4.73812e-19	ADAM12	GO:0006508;GO:0007155;GO:0045766;GO:0030198;GO:0007520;GO:0006508;GO:0007155;GO:0045766;GO:0030198;GO:0007520;GO:0006508	proteolysis;cell adhesion;positive regulation of angiogenesis;extracellular matrix organization;myoblast fusion;proteolysis;cell adhesion;positive regulation of angiogenesis;extracellular matrix organization;myoblast fusion;proteolysis	GO:0004222;GO:0008237;GO:0046872;GO:0016787;GO:0005515;GO:0008233;GO:0017124;GO:0008237;GO:0017124;GO:0004222;GO:0008237;GO:0046872;GO:0016787;GO:0005515;GO:0008233;GO:0017124;GO:0008237;GO:0017124;GO:0004222;GO:0008237	metalloendopeptidase activity;metallopeptidase activity;metal ion binding;hydrolase activity;protein binding;peptidase activity;SH3 domain binding;metallopeptidase activity;SH3 domain binding;metalloendopeptidase activity;metallopeptidase activity;metal ion binding;hydrolase activity;protein binding;peptidase activity;SH3 domain binding;metallopeptidase activity;SH3 domain binding;metalloendopept…	GO:0016020;GO:0016021;GO:0005654;GO:0005886;GO:0005886;GO:0005576;GO:0005886;GO:0005615;GO:0016020;GO:0016021;GO:0005654;GO:0005886;GO:0005886;GO:0005576;GO:0005886	membrane;integral component of membrane;nucleoplasm;plasma membrane;plasma membrane;extracellular region;plasma membrane;extracellular space;membrane;integral component of membrane;nucleoplasm;plasma membrane;plasma membrane;extracellular region;plasma membrane
MT1P3	12.3977	3.632	3.09524e-21	4.96297e-19	MT1P3	NA	NA	NA	NA	NA	NA
B3GNT5	3.89332	1.961	4.70643e-21	7.45205e-19	B3GNT5	GO:0006486;GO:0006486;GO:0007275;GO:0006486;GO:0016266;GO:0007417;GO:0009247;GO:0006486;GO:0006486;GO:0007275;GO:0006486;GO:0016266;GO:0007417;GO:0007420;GO:0009247;GO:0006486;GO:0006486;GO:0007275;GO:0006486;GO:0016266;GO:0007417;GO:0009247	protein glycosylation;protein glycosylation;multicellular organism development;protein glycosylation;O-glycan processing;central nervous system development;glycolipid biosynthetic process;protein glycosylation;protein glycosylation;multicellular organism development;protein glycosylation;O-glycan processing;central nervous system development;brain development;glycolipid biosynthetic process;prote…	GO:0008378;GO:0016757;GO:0008378;GO:0016740;GO:0016757;GO:0008499;GO:0008457;GO:0047256;GO:0008378;GO:0016757;GO:0008378;GO:0016740;GO:0016757;GO:0008499;GO:0008457;GO:0047256;GO:0008378;GO:0016757;GO:0008378;GO:0016740;GO:0016757;GO:0008499;GO:0008457;GO:0047256	galactosyltransferase activity;transferase activity, transferring glycosyl groups;galactosyltransferase activity;transferase activity;transferase activity, transferring glycosyl groups;UDP-galactose:beta-N-acetylglucosamine beta-1,3-galactosyltransferase activity;beta-galactosyl-N-acetylglucosaminylgalactosylglucosyl-ceramide beta-1,3-acetylglucosaminyltransferase activity;lactosylceramide 1,3-N-…	GO:0016020;GO:0016021;GO:0005794;GO:0000139;GO:0016020;GO:0016021;GO:0005794;GO:0000139;GO:0005622;GO:0000139;GO:0016020;GO:0016021;GO:0005794;GO:0000139;GO:0016020;GO:0016021;GO:0005794;GO:0000139;GO:0005622;GO:0000139;GO:0016020;GO:0016021;GO:0005794;GO:0000139;GO:0016020;GO:0016021;GO:0005794;GO:0000139;GO:0005622;GO:0000139	membrane;integral component of membrane;Golgi apparatus;Golgi membrane;membrane;integral component of membrane;Golgi apparatus;Golgi membrane;intracellular;Golgi membrane;membrane;integral component of membrane;Golgi apparatus;Golgi membrane;membrane;integral component of membrane;Golgi apparatus;Golgi membrane;intracellular;Golgi membrane;membrane;integral component of membrane;Golgi apparatus;G…
POM121L9P	4.23687	2.083	8.77531e-21	1.37231e-18	POM121L9P	NA	NA	NA	NA	NA	NA
SLPI	7.57896	2.922	9.24635e-21	1.41113e-18	SLPI	GO:0010951;GO:0006955;GO:0002376;GO:0045087;GO:0045087;GO:0010466;GO:0042742;GO:0032496;GO:0045071;GO:0019731;GO:0019731;GO:0043312;GO:0032091;GO:0006955;GO:0019731;GO:0032496;GO:0035821	negative regulation of endopeptidase activity;immune response;immune system process;innate immune response;innate immune response;negative regulation of peptidase activity;defense response to bacterium;response to lipopolysaccharide;negative regulation of viral genome replication;antibacterial humoral response;antibacterial humoral response;neutrophil degranulation;negative regulation of protein …	GO:0030414;GO:0003677;GO:0005515;GO:0003729;GO:0004867;GO:0004867;GO:0019899;GO:0004866	peptidase inhibitor activity;DNA binding;protein binding;mRNA binding;serine-type endopeptidase inhibitor activity;serine-type endopeptidase inhibitor activity;enzyme binding;endopeptidase inhibitor activity	GO:0005576;GO:0005615;GO:0005576;GO:0070062;GO:0031012;GO:0035580;GO:0005615	extracellular region;extracellular space;extracellular region;extracellular exosome;extracellular matrix;specific granule lumen;extracellular space
SDC4	2.38667	1.255	9.15091e-21	1.41113e-18	SDC4	GO:0007165;GO:0050900;GO:0016477;GO:0001523;GO:0006024;GO:0006027;GO:0030203;GO:1903543;GO:1903553;GO:0001657;GO:0001843;GO:0010762;GO:0042060;GO:0042130;GO:0045860;GO:0051496;GO:0051894;GO:0060122	signal transduction;leukocyte migration;cell migration;retinoid metabolic process;glycosaminoglycan biosynthetic process;glycosaminoglycan catabolic process;glycosaminoglycan metabolic process;positive regulation of exosomal secretion;positive regulation of extracellular exosome assembly;ureteric bud development;neural tube closure;regulation of fibroblast migration;wound healing;negative regulat…	GO:0005515;GO:0042802;GO:0070053;GO:0001968;GO:0005080	protein binding;identical protein binding;thrombospondin receptor activity;fibronectin binding;protein kinase C binding	GO:0016020;GO:0016021;GO:0005576;GO:0005886;GO:0009986;GO:0005887;GO:0070062;GO:0043202;GO:0005796;GO:0005925;GO:0009986;GO:0043034;GO:0045121	membrane;integral component of membrane;extracellular region;plasma membrane;cell surface;integral component of plasma membrane;extracellular exosome;lysosomal lumen;Golgi lumen;focal adhesion;cell surface;costamere;membrane raft
APBB2	2.88186	1.527	1.3232e-20	1.99535e-18	APBB2	GO:0006355;GO:0006355;GO:0007050;GO:0030308;GO:0035556;GO:0006355;GO:0006355;GO:0007050;GO:0030308;GO:0035556;GO:0006355;GO:0006355;GO:0007050;GO:0030308;GO:0035556;GO:0001764;GO:0006355;GO:0007050;GO:0007411;GO:0030198;GO:0030308;GO:0043065;GO:0043066;GO:0006355;GO:0006355;GO:0007050;GO:0030308;GO:0035556;GO:0006355;GO:0006355;GO:0007050;GO:0030308;GO:0035556;GO:0006355;GO:0006355;GO:0007050;GO:…	regulation of transcription, DNA-templated;regulation of transcription, DNA-templated;cell cycle arrest;negative regulation of cell growth;intracellular signal transduction;regulation of transcription, DNA-templated;regulation of transcription, DNA-templated;cell cycle arrest;negative regulation of cell growth;intracellular signal transduction;regulation of transcription, DNA-templated;regulation…	GO:0005515;GO:0005515;GO:0008134;GO:0001540;GO:0008134;GO:0001540;GO:0005515;GO:0005515;GO:0008134;GO:0001540;GO:0008134;GO:0001540;GO:0005515;GO:0005515;GO:0005515;GO:0008134;GO:0001540;GO:0008134;GO:0001540;GO:0008134;GO:0005515;GO:0005515;GO:0008134;GO:0001540;GO:0008134;GO:0001540;GO:0005515;GO:0005515;GO:0005515;GO:0008134;GO:0001540;GO:0008134;GO:0001540;GO:0005515;GO:0005515;GO:0005515;GO:…	protein binding;protein binding;transcription factor binding;amyloid-beta binding;transcription factor binding;amyloid-beta binding;protein binding;protein binding;transcription factor binding;amyloid-beta binding;transcription factor binding;amyloid-beta binding;protein binding;protein binding;protein binding;transcription factor binding;amyloid-beta binding;transcription factor binding;amyloid-…	GO:0005634;GO:0016020;GO:0045202;GO:0005634;GO:0005737;GO:0030027;GO:0030426;GO:0005634;GO:0016020;GO:0045202;GO:0005634;GO:0005737;GO:0030027;GO:0030426;GO:0005634;GO:0016020;GO:0045202;GO:0005634;GO:0005737;GO:0030027;GO:0030426;GO:0005634;GO:0005737;GO:0005634;GO:0016020;GO:0045202;GO:0005634;GO:0005737;GO:0030027;GO:0030426;GO:0005634;GO:0016020;GO:0045202;GO:0005634;GO:0005737;GO:0030027;GO:…	nucleus;membrane;synapse;nucleus;cytoplasm;lamellipodium;growth cone;nucleus;membrane;synapse;nucleus;cytoplasm;lamellipodium;growth cone;nucleus;membrane;synapse;nucleus;cytoplasm;lamellipodium;growth cone;nucleus;cytoplasm;nucleus;membrane;synapse;nucleus;cytoplasm;lamellipodium;growth cone;nucleus;membrane;synapse;nucleus;cytoplasm;lamellipodium;growth cone;nucleus;membrane;synapse;nucleus;cyt…
TNFAIP3	3.05887	1.613	2.14749e-20	3.20027e-18	TNFAIP3	GO:0016579;GO:0016567;GO:0016579;GO:0016567;GO:0008152;GO:0006508;GO:0006915;GO:0006954;GO:0050728;GO:0031397;GO:0071222;GO:0048662;GO:2000352;GO:0016579;GO:0045824;GO:0070536;GO:0071108;GO:0032715;GO:0032720;GO:0070936;GO:0043124;GO:0010803;GO:0070423;GO:0032480;GO:0045732;GO:0070301;GO:1902042;GO:0032088;GO:0090291;GO:0050727;GO:0032703;GO:0045779;GO:0051259;GO:0002237;GO:0034144;GO:0001922;GO:…	protein deubiquitination;protein ubiquitination;protein deubiquitination;protein ubiquitination;metabolic process;proteolysis;apoptotic process;inflammatory response;negative regulation of inflammatory response;negative regulation of protein ubiquitination;cellular response to lipopolysaccharide;negative regulation of smooth muscle cell proliferation;negative regulation of endothelial cell apopto…	GO:0003677;GO:0008270;GO:0046872;GO:0016740;GO:0016787;GO:0005515;GO:0003824;GO:0008233;GO:0008234;GO:0004842;GO:0036459;GO:0036459;GO:0042802;GO:0004843;GO:0061578;GO:0061578;GO:0002020;GO:0043130;GO:0043621;GO:0004843;GO:0070530;GO:0003677;GO:0008270;GO:0046872;GO:0016740;GO:0016787;GO:0005515;GO:0003824;GO:0008233;GO:0008234;GO:0004842;GO:0036459;GO:0036459;GO:0042802;GO:0004843;GO:0061578;GO:…	DNA binding;zinc ion binding;metal ion binding;transferase activity;hydrolase activity;protein binding;catalytic activity;peptidase activity;cysteine-type peptidase activity;ubiquitin-protein transferase activity;thiol-dependent ubiquitinyl hydrolase activity;thiol-dependent ubiquitinyl hydrolase activity;identical protein binding;thiol-dependent ubiquitin-specific protease activity;Lys63-specifi…	GO:0043231;GO:0005634;GO:0005737;GO:0043231;GO:0005764;GO:0005737;GO:0005829;GO:0070062;GO:0005634;GO:0043231;GO:0005634;GO:0005737;GO:0043231;GO:0005764;GO:0005737;GO:0005829;GO:0070062;GO:0005634;GO:0043231;GO:0043231;GO:0043231;GO:0043231;GO:0043231	intracellular membrane-bounded organelle;nucleus;cytoplasm;intracellular membrane-bounded organelle;lysosome;cytoplasm;cytosol;extracellular exosome;nucleus;intracellular membrane-bounded organelle;nucleus;cytoplasm;intracellular membrane-bounded organelle;lysosome;cytoplasm;cytosol;extracellular exosome;nucleus;intracellular membrane-bounded organelle;intracellular membrane-bounded organelle;int…
SMIM3	2.76638	1.468	2.51867e-20	3.70976e-18	SMIM3	NA	NA	GO:0005515	protein binding	GO:0016020;GO:0016021	membrane;integral component of membrane
CXCL12	0.214047	-2.224	2.71767e-20	3.95687e-18	CXCL12	GO:0006935;GO:0006955;GO:0006952;GO:0010469;GO:0006935;GO:0050918;GO:0007186;GO:0007411;GO:0006955;GO:0007165;GO:0007155;GO:0007411;GO:0060326;GO:1903237;GO:2000406;GO:2000669;GO:0009615;GO:0008064;GO:0033622;GO:1902230;GO:0090026;GO:0008015;GO:0006874;GO:0090280;GO:0070098;GO:0050930;GO:0045785;GO:0010469;GO:0006955;GO:0006935;GO:0006935;GO:0006952;GO:0050918;GO:0007186;GO:0007411;GO:0006955;GO:…	chemotaxis;immune response;defense response;regulation of receptor activity;chemotaxis;positive chemotaxis;G-protein coupled receptor signaling pathway;axon guidance;immune response;signal transduction;cell adhesion;axon guidance;cell chemotaxis;negative regulation of leukocyte tethering or rolling;positive regulation of T cell migration;negative regulation of dendritic cell apoptotic process;res…	GO:0008009;GO:0008083;GO:0005125;GO:0042056;GO:0008009;GO:0008009;GO:0005178;GO:0005102;GO:0042379;GO:0045236;GO:0008083;GO:0005125;GO:0008009;GO:0042056;GO:0008009;GO:0008009;GO:0005178;GO:0005102;GO:0042379;GO:0045236;GO:0008009;GO:0008083;GO:0005125;GO:0042056;GO:0008009;GO:0008009;GO:0005178;GO:0005102;GO:0042379;GO:0045236;GO:0008009;GO:0008083;GO:0005125;GO:0042056;GO:0008009;GO:0008009;GO:…	chemokine activity;growth factor activity;cytokine activity;chemoattractant activity;chemokine activity;chemokine activity;integrin binding;receptor binding;chemokine receptor binding;CXCR chemokine receptor binding;growth factor activity;cytokine activity;chemokine activity;chemoattractant activity;chemokine activity;chemokine activity;integrin binding;receptor binding;chemokine receptor binding…	GO:0005576;GO:0005615;GO:0005576;GO:0009897;GO:0070062;GO:0005576;GO:0005615;GO:0005576;GO:0009897;GO:0070062;GO:0005576;GO:0005615;GO:0005576;GO:0009897;GO:0070062;GO:0005576;GO:0005615;GO:0005576;GO:0009897;GO:0070062;GO:0005576;GO:0005615;GO:0005576;GO:0009897;GO:0070062;GO:0005737;GO:0005886;GO:0005576;GO:0005615;GO:0005576;GO:0009897;GO:0070062	extracellular region;extracellular space;extracellular region;external side of plasma membrane;extracellular exosome;extracellular region;extracellular space;extracellular region;external side of plasma membrane;extracellular exosome;extracellular region;extracellular space;extracellular region;external side of plasma membrane;extracellular exosome;extracellular region;extracellular space;extrace…
MID1	0.417255	-1.261	6.7228e-20	9.67701e-18	MID1	GO:0032874;GO:0007389;GO:0060333;GO:0000226;GO:0035372;GO:0032874;GO:0007389;GO:0060333;GO:0000226;GO:0035372;GO:0032874;GO:0007389;GO:0060333;GO:0000226;GO:0035372;GO:0032874;GO:0007389;GO:0060333;GO:0000226;GO:0035372;GO:0032874;GO:0007389;GO:0060333;GO:0000226;GO:0035372;GO:0032874;GO:0007389;GO:0060333;GO:0000226;GO:0035372;GO:0007026;GO:0032874;GO:0007389;GO:0060333;GO:0000226;GO:0035372	positive regulation of stress-activated MAPK cascade;pattern specification process;interferon-gamma-mediated signaling pathway;microtubule cytoskeleton organization;protein localization to microtubule;positive regulation of stress-activated MAPK cascade;pattern specification process;interferon-gamma-mediated signaling pathway;microtubule cytoskeleton organization;protein localization to microtubu…	GO:0008270;GO:0005515;GO:0046872;GO:0016740;GO:0042803;GO:0005515;GO:0008017;GO:0042802;GO:0031625;GO:0046982;GO:0051219;GO:0008270;GO:0005515;GO:0046872;GO:0016740;GO:0042803;GO:0005515;GO:0008017;GO:0042802;GO:0031625;GO:0046982;GO:0051219;GO:0008270;GO:0005515;GO:0046872;GO:0016740;GO:0042803;GO:0005515;GO:0008017;GO:0042802;GO:0031625;GO:0046982;GO:0051219;GO:0008270;GO:0005515;GO:0046872;GO:…	zinc ion binding;protein binding;metal ion binding;transferase activity;protein homodimerization activity;protein binding;microtubule binding;identical protein binding;ubiquitin protein ligase binding;protein heterodimerization activity;phosphoprotein binding;zinc ion binding;protein binding;metal ion binding;transferase activity;protein homodimerization activity;protein binding;microtubule bindi…	GO:0005622;GO:0005737;GO:0005856;GO:0005874;GO:0005874;GO:0005819;GO:0005829;GO:0005875;GO:0005881;GO:0005622;GO:0005737;GO:0005856;GO:0005874;GO:0005874;GO:0005819;GO:0005829;GO:0005875;GO:0005881;GO:0005622;GO:0005737;GO:0005856;GO:0005874;GO:0005874;GO:0005819;GO:0005829;GO:0005875;GO:0005881;GO:0005622;GO:0005737;GO:0005856;GO:0005874;GO:0005874;GO:0005819;GO:0005829;GO:0005875;GO:0005881;GO:…	intracellular;cytoplasm;cytoskeleton;microtubule;microtubule;spindle;cytosol;microtubule associated complex;cytoplasmic microtubule;intracellular;cytoplasm;cytoskeleton;microtubule;microtubule;spindle;cytosol;microtubule associated complex;cytoplasmic microtubule;intracellular;cytoplasm;cytoskeleton;microtubule;microtubule;spindle;cytosol;microtubule associated complex;cytoplasmic microtubule;int…
STK39	2.37841	1.25	7.47193e-20	1.06345e-17	STK39	GO:0006468;GO:0016310;GO:0042981;GO:0046777;GO:0007346;GO:0018107;GO:0018105;GO:0000187;GO:0018105;GO:0046777;GO:0031098;GO:0032147;GO:0018107;GO:0006468;GO:0035556;GO:0023016;GO:1905408;GO:2000650;GO:0000187;GO:0001933;GO:0008217;GO:0018107;GO:0023014;GO:0032414;GO:0032414;GO:0035556;GO:0036438;GO:0036438;GO:0043268;GO:0046777;GO:0050727;GO:0071476;GO:0071476;GO:0090188;GO:1901017;GO:1901017;GO:…	protein phosphorylation;phosphorylation;regulation of apoptotic process;protein autophosphorylation;regulation of mitotic cell cycle;peptidyl-threonine phosphorylation;peptidyl-serine phosphorylation;activation of MAPK activity;peptidyl-serine phosphorylation;protein autophosphorylation;stress-activated protein kinase signaling cascade;activation of protein kinase activity;peptidyl-threonine phos…	GO:0005524;GO:0004674;GO:0004672;GO:0000166;GO:0004674;GO:0016740;GO:0016301;GO:0005515;GO:0004674;GO:0016301;GO:0019901	ATP binding;protein serine/threonine kinase activity;protein kinase activity;nucleotide binding;protein serine/threonine kinase activity;transferase activity;kinase activity;protein binding;protein serine/threonine kinase activity;kinase activity;protein kinase binding	GO:0005634;GO:0005737;GO:0043231;GO:0005829;GO:0005654;GO:0005829;GO:0005737;GO:0005829;GO:0019898;GO:0005829;GO:0005856;GO:0016020;GO:0016323;GO:0016324;GO:0019898	nucleus;cytoplasm;intracellular membrane-bounded organelle;cytosol;nucleoplasm;cytosol;cytoplasm;cytosol;extrinsic component of membrane;cytosol;cytoskeleton;membrane;basolateral plasma membrane;apical plasma membrane;extrinsic component of membrane
C1QTNF1	4.70437	2.234	1.17473e-19	1.65337e-17	C1QTNF1	GO:0010628;GO:0007204;GO:0090331;GO:0010544;GO:2000860;GO:0010628;GO:0007204;GO:0090331;GO:0010544;GO:2000860;GO:0010628;GO:0007204;GO:0090331;GO:0010544;GO:0010906;GO:0043410;GO:0051260;GO:0051897;GO:0070208;GO:2000860;GO:0010628;GO:0007204;GO:0090331;GO:0010544;GO:2000860;GO:0010628;GO:0007204;GO:0090331;GO:0010544;GO:2000860;GO:0010628;GO:0007204;GO:0090331;GO:0010544;GO:2000860;GO:0010628;GO:…	positive regulation of gene expression;positive regulation of cytosolic calcium ion concentration;negative regulation of platelet aggregation;negative regulation of platelet activation;positive regulation of aldosterone secretion;positive regulation of gene expression;positive regulation of cytosolic calcium ion concentration;negative regulation of platelet aggregation;negative regulation of plat…	GO:0005515;GO:0005515;GO:0005515;GO:0005518;GO:0005515;GO:0005515;GO:0005518;GO:0005515;GO:0005515;GO:0005518;GO:0005515;GO:0005515;GO:0005515;GO:0005518;GO:0005515;GO:0005515;GO:0005518;GO:0005515;GO:0005515;GO:0005518;GO:0005515;GO:0005515;GO:0005518;GO:0005515;GO:0005515;GO:0005518	protein binding;protein binding;protein binding;collagen binding;protein binding;protein binding;collagen binding;protein binding;protein binding;collagen binding;protein binding;protein binding;protein binding;collagen binding;protein binding;protein binding;collagen binding;protein binding;protein binding;collagen binding;protein binding;protein binding;collagen binding;protein binding;protein …	GO:0005576;GO:0005581;GO:0005576;GO:0005581;GO:0005615;GO:0005887;GO:0005576;GO:0005581;GO:0005615;GO:0005887;GO:0005576;GO:0005581;GO:0005615;GO:0005887;GO:0005615;GO:0005576;GO:0005581;GO:0005576;GO:0005581;GO:0005615;GO:0005887;GO:0005576;GO:0005581;GO:0005615;GO:0005887;GO:0005576;GO:0005581;GO:0005615;GO:0005887;GO:0005576;GO:0005581;GO:0005615;GO:0005887;GO:0005576;GO:0005581;GO:0005615;GO:…	extracellular region;collagen trimer;extracellular region;collagen trimer;extracellular space;integral component of plasma membrane;extracellular region;collagen trimer;extracellular space;integral component of plasma membrane;extracellular region;collagen trimer;extracellular space;integral component of plasma membrane;extracellular space;extracellular region;collagen trimer;extracellular region…
A4GALT	4.78328	2.258	1.37661e-19	1.91621e-17	A4GALT	GO:0006629;GO:0006486;GO:0001576;GO:0006688;GO:0007009;GO:0006629;GO:0006486;GO:0006688;GO:0007009;GO:0006629;GO:0006486;GO:0006688;GO:0007009	lipid metabolic process;protein glycosylation;globoside biosynthetic process;glycosphingolipid biosynthetic process;plasma membrane organization;lipid metabolic process;protein glycosylation;glycosphingolipid biosynthetic process;plasma membrane organization;lipid metabolic process;protein glycosylation;glycosphingolipid biosynthetic process;plasma membrane organization	GO:0016740;GO:0016757;GO:0016740;GO:0016757;GO:0008378;GO:0015643;GO:0050512;GO:0008378;GO:0016740;GO:0016757;GO:0008378;GO:0050512;GO:0016740;GO:0016757;GO:0008378;GO:0050512	transferase activity;transferase activity, transferring glycosyl groups;transferase activity;transferase activity, transferring glycosyl groups;galactosyltransferase activity;toxic substance binding;lactosylceramide 4-alpha-galactosyltransferase activity;galactosyltransferase activity;transferase activity;transferase activity, transferring glycosyl groups;galactosyltransferase activity;lactosylce…	GO:0016020;GO:0016021;GO:0016020;GO:0016021;GO:0005794;GO:0000139;GO:0070062;GO:0030173;GO:0016020;GO:0016020;GO:0016021;GO:0005794;GO:0000139;GO:0070062;GO:0030173;GO:0016020;GO:0016020;GO:0016021;GO:0005794;GO:0000139;GO:0070062;GO:0030173;GO:0016020	membrane;integral component of membrane;membrane;integral component of membrane;Golgi apparatus;Golgi membrane;extracellular exosome;integral component of Golgi membrane;membrane;membrane;integral component of membrane;Golgi apparatus;Golgi membrane;extracellular exosome;integral component of Golgi membrane;membrane;membrane;integral component of membrane;Golgi apparatus;Golgi membrane;extracellu…
BIRC3	5.95871	2.575	1.57755e-19	2.17205e-17	BIRC3	GO:0042981;GO:0016567;GO:0006915;GO:0016579;GO:0033209;GO:0031398;GO:0043123;GO:0042981;GO:0002756;GO:0007249;GO:0035666;GO:0007166;GO:0043066;GO:0010803;GO:1990001;GO:0060544;GO:0050727;GO:0045088;GO:0060544;GO:2000116;GO:0070424;GO:0007283;GO:0034121;GO:0038061;GO:0039535;GO:0051291;GO:0060546;GO:0042981;GO:0016567;GO:0006915;GO:0016579;GO:0033209;GO:0031398;GO:0043123;GO:0042981;GO:0002756;GO:…	regulation of apoptotic process;protein ubiquitination;apoptotic process;protein deubiquitination;tumor necrosis factor-mediated signaling pathway;positive regulation of protein ubiquitination;positive regulation of I-kappaB kinase/NF-kappaB signaling;regulation of apoptotic process;MyD88-independent toll-like receptor signaling pathway;I-kappaB kinase/NF-kappaB signaling;TRIF-dependent toll-like…	GO:0046872;GO:0016740;GO:0005515;GO:0004842;GO:0004842;GO:0004842;GO:0016740;GO:0043027;GO:0046872;GO:0016740;GO:0005515;GO:0004842;GO:0004842;GO:0004842;GO:0016740;GO:0043027;GO:0046872;GO:0016740;GO:0005515;GO:0004842;GO:0004842;GO:0004842;GO:0016740;GO:0043027	metal ion binding;transferase activity;protein binding;ubiquitin-protein transferase activity;ubiquitin-protein transferase activity;ubiquitin-protein transferase activity;transferase activity;cysteine-type endopeptidase inhibitor activity involved in apoptotic process;metal ion binding;transferase activity;protein binding;ubiquitin-protein transferase activity;ubiquitin-protein transferase activ…	GO:0005634;GO:0005634;GO:0005737;GO:0005737;GO:0005829;GO:0005654;GO:0005829;GO:0045121;GO:0005634;GO:0005634;GO:0005737;GO:0005737;GO:0005829;GO:0005654;GO:0005829;GO:0005634;GO:0005634;GO:0005737;GO:0005737;GO:0005829;GO:0005654;GO:0005829	nucleus;nucleus;cytoplasm;cytoplasm;cytosol;nucleoplasm;cytosol;membrane raft;nucleus;nucleus;cytoplasm;cytoplasm;cytosol;nucleoplasm;cytosol;nucleus;nucleus;cytoplasm;cytoplasm;cytosol;nucleoplasm;cytosol
LAMB4	0.1971	-2.343	1.6921e-19	2.30471e-17	LAMB4	GO:0007155;GO:0007155	cell adhesion;cell adhesion	NA	NA	GO:0005576;GO:0005578;GO:0005604;GO:0005576;GO:0005578;GO:0005604	extracellular region;proteinaceous extracellular matrix;basement membrane;extracellular region;proteinaceous extracellular matrix;basement membrane
HSD11B1	5.77972	2.531	2.15194e-19	2.89985e-17	HSD11B1	GO:0055114;GO:0055114;GO:0006629;GO:0008202;GO:0006704;GO:0055114;GO:0006629;GO:0008202;GO:0006704;GO:0030324	oxidation-reduction process;oxidation-reduction process;lipid metabolic process;steroid metabolic process;glucocorticoid biosynthetic process;oxidation-reduction process;lipid metabolic process;steroid metabolic process;glucocorticoid biosynthetic process;lung development	GO:0016491;GO:0016491;GO:0003845;GO:0070524;GO:0016491;GO:0003845;GO:0003845;GO:0070524	oxidoreductase activity;oxidoreductase activity;11-beta-hydroxysteroid dehydrogenase [NAD(P)] activity;11-beta-hydroxysteroid dehydrogenase (NADP+) activity;oxidoreductase activity;11-beta-hydroxysteroid dehydrogenase [NAD(P)] activity;11-beta-hydroxysteroid dehydrogenase [NAD(P)] activity;11-beta-hydroxysteroid dehydrogenase (NADP+) activity	GO:0016020;GO:0016021;GO:0016020;GO:0016021;GO:0016020;GO:0016020;GO:0016021;GO:0005783;GO:0005789;GO:0005789;GO:0016020;GO:0016020;GO:0016021;GO:0005783;GO:0005789;GO:0005789	membrane;integral component of membrane;membrane;integral component of membrane;membrane;membrane;integral component of membrane;endoplasmic reticulum;endoplasmic reticulum membrane;endoplasmic reticulum membrane;membrane;membrane;integral component of membrane;endoplasmic reticulum;endoplasmic reticulum membrane;endoplasmic reticulum membrane
LDB2	0.229251	-2.125	3.46677e-19	4.57433e-17	LDB2	GO:0006357;GO:0006357;GO:0030334;GO:0043549;GO:0006357;GO:0030334;GO:0001942;GO:0010669;GO:0030334;GO:0035019;GO:0043549;GO:0043549;GO:0044089;GO:0045944;GO:0006357;GO:0006357;GO:0006357;GO:0006357;GO:0006357	regulation of transcription from RNA polymerase II promoter;regulation of transcription from RNA polymerase II promoter;regulation of cell migration;regulation of kinase activity;regulation of transcription from RNA polymerase II promoter;regulation of cell migration;hair follicle development;epithelial structure maintenance;regulation of cell migration;somatic stem cell population maintenance;re…	GO:0000989;GO:0030274;GO:0000989;GO:0030274;GO:0005515;GO:0003712;GO:0030274;GO:0000989;GO:0030274;GO:0005515;GO:0003712;GO:0030274;GO:0019899;GO:0000989;GO:0030274;GO:0000989;GO:0030274;GO:0000989;GO:0030274;GO:0000989;GO:0030274;GO:0000989;GO:0030274	transcription factor activity, transcription factor binding;LIM domain binding;transcription factor activity, transcription factor binding;LIM domain binding;protein binding;transcription cofactor activity;LIM domain binding;transcription factor activity, transcription factor binding;LIM domain binding;protein binding;transcription cofactor activity;LIM domain binding;enzyme binding;transcription…	GO:0005634;GO:0005634;GO:0005730;GO:0005886;GO:0005634;GO:0005634;GO:0005730;GO:0005886;GO:0031252;GO:0005634;GO:0005634;GO:0005730;GO:0005886;GO:0031252;GO:0005667;GO:0031252;GO:0005634;GO:0005634;GO:0005730;GO:0005886;GO:0005634;GO:0005634;GO:0005730;GO:0005886;GO:0005634;GO:0005634;GO:0005634	nucleus;nucleus;nucleolus;plasma membrane;nucleus;nucleus;nucleolus;plasma membrane;cell leading edge;nucleus;nucleus;nucleolus;plasma membrane;cell leading edge;transcription factor complex;cell leading edge;nucleus;nucleus;nucleolus;plasma membrane;nucleus;nucleus;nucleolus;plasma membrane;nucleus;nucleus;nucleus
FAM46C	0.164368	-2.605	3.45018e-19	4.57433e-17	FAM46C	NA	NA	GO:0016740;GO:0005515;GO:0016779	transferase activity;protein binding;nucleotidyltransferase activity	NA	NA
FPR1	8.59799	3.104	3.70113e-19	4.83322e-17	FPR1	GO:0007186;GO:0007165;GO:0006935;GO:0060326;GO:0006954;GO:0007186;GO:0043312;GO:0006935;GO:0007165;GO:0019221;GO:0007188;GO:0002430;GO:0007204;GO:0050900;GO:0007263;GO:0000187;GO:0007200;GO:0007200;GO:0007186;GO:0007165;GO:0006935;GO:0060326;GO:0006954;GO:0007186;GO:0043312;GO:0006935;GO:0007165;GO:0019221;GO:0007188;GO:0002430;GO:0007204;GO:0050900;GO:0007263;GO:0000187;GO:0007200;GO:0007186;GO:…	G-protein coupled receptor signaling pathway;signal transduction;chemotaxis;cell chemotaxis;inflammatory response;G-protein coupled receptor signaling pathway;neutrophil degranulation;chemotaxis;signal transduction;cytokine-mediated signaling pathway;adenylate cyclase-modulating G-protein coupled receptor signaling pathway;complement receptor mediated signaling pathway;positive regulation of cyto…	GO:0004930;GO:0004982;GO:0005515;GO:0004871;GO:0004875;GO:0004982;GO:0004982;GO:0005124;GO:0050786;GO:0004930;GO:0004982;GO:0005515;GO:0004871;GO:0004875;GO:0004982;GO:0004982;GO:0004930;GO:0004982;GO:0004871;GO:0004982	G-protein coupled receptor activity;N-formyl peptide receptor activity;protein binding;signal transducer activity;complement receptor activity;N-formyl peptide receptor activity;N-formyl peptide receptor activity;scavenger receptor binding;RAGE receptor binding;G-protein coupled receptor activity;N-formyl peptide receptor activity;protein binding;signal transducer activity;complement receptor act…	GO:0016021;GO:0016020;GO:0005886;GO:0005886;GO:0005887;GO:0016021;GO:0005622;GO:0030667;GO:0035577;GO:0101003;GO:0005886;GO:0005622;GO:0016021;GO:0016020;GO:0005886;GO:0005886;GO:0005887;GO:0016021;GO:0005622;GO:0030667;GO:0035577;GO:0101003;GO:0005886;GO:0016021;GO:0016020;GO:0016021;GO:0016020	integral component of membrane;membrane;plasma membrane;plasma membrane;integral component of plasma membrane;integral component of membrane;intracellular;secretory granule membrane;azurophil granule membrane;ficolin-1-rich granule membrane;plasma membrane;intracellular;integral component of membrane;membrane;plasma membrane;plasma membrane;integral component of plasma membrane;integral component…
MMP13	0.111259	-3.168	5.70478e-19	7.29924e-17	MMP13	GO:0006508;GO:0030574;GO:0006508;GO:0030574;GO:0022617;GO:0030574;GO:0060349;GO:0022617;GO:0030574;GO:0006508;GO:0001958;GO:0003417;GO:0022617;GO:0030282;GO:0044267;GO:0051216;GO:0006508;GO:0030574	proteolysis;collagen catabolic process;proteolysis;collagen catabolic process;extracellular matrix disassembly;collagen catabolic process;bone morphogenesis;extracellular matrix disassembly;collagen catabolic process;proteolysis;endochondral ossification;growth plate cartilage development;extracellular matrix disassembly;bone mineralization;cellular protein metabolic process;cartilage development…	GO:0008270;GO:0004222;GO:0008237;GO:0046872;GO:0016787;GO:0008233;GO:0008270;GO:0004222;GO:0008237;GO:0046872;GO:0016787;GO:0008270;GO:0008233;GO:0005509;GO:0004252;GO:0004222;GO:0004222;GO:0008270;GO:0005518;GO:0008270;GO:0004222;GO:0008237;GO:0046872;GO:0016787;GO:0008233	zinc ion binding;metalloendopeptidase activity;metallopeptidase activity;metal ion binding;hydrolase activity;peptidase activity;zinc ion binding;metalloendopeptidase activity;metallopeptidase activity;metal ion binding;hydrolase activity;zinc ion binding;peptidase activity;calcium ion binding;serine-type endopeptidase activity;metalloendopeptidase activity;metalloendopeptidase activity;zinc ion …	GO:0005576;GO:0031012;GO:0005581;GO:0005576;GO:0031012;GO:0005578;GO:0005576;GO:0005615;GO:0005576;GO:0031012	extracellular region;extracellular matrix;collagen trimer;extracellular region;extracellular matrix;proteinaceous extracellular matrix;extracellular region;extracellular space;extracellular region;extracellular matrix
HIP1	2.94241	1.557	1.03079e-18	1.3057e-16	HIP1	GO:0006915;GO:0006897;GO:0048268;GO:0072583;GO:0006351;GO:0006355;GO:0007010;GO:0030154;GO:0006915;GO:0006919;GO:0030100;GO:0042981;GO:0045742;GO:0048260;GO:0048260;GO:0048268;GO:0050821;GO:0051897;GO:0061024;GO:0097190;GO:0099637;GO:2000588;GO:0006915;GO:0006897;GO:0048268;GO:0072583;GO:0006351;GO:0006355;GO:0007010;GO:0030154;GO:0006915;GO:0006919;GO:0030100;GO:0042981;GO:0045742;GO:0048260;GO:…	apoptotic process;endocytosis;clathrin coat assembly;clathrin-dependent endocytosis;transcription, DNA-templated;regulation of transcription, DNA-templated;cytoskeleton organization;cell differentiation;apoptotic process;activation of cysteine-type endopeptidase activity involved in apoptotic process;regulation of endocytosis;regulation of apoptotic process;positive regulation of epidermal growth…	GO:0005543;GO:0035091;GO:0003779;GO:0030276;GO:0005515;GO:0035091;GO:0005154;GO:0005200;GO:0030276;GO:0032051;GO:0032266;GO:0035254;GO:0035612;GO:0035615;GO:0042803;GO:0043325;GO:0046982;GO:0051015;GO:0080025;GO:0005543;GO:0035091;GO:0003779;GO:0030276;GO:0005515;GO:0035091;GO:0005154;GO:0005200;GO:0030276;GO:0032051;GO:0032266;GO:0035254;GO:0035612;GO:0035615;GO:0042803;GO:0043325;GO:0046982;GO:…	phospholipid binding;phosphatidylinositol binding;actin binding;clathrin binding;protein binding;phosphatidylinositol binding;epidermal growth factor receptor binding;structural constituent of cytoskeleton;clathrin binding;clathrin light chain binding;phosphatidylinositol-3-phosphate binding;glutamate receptor binding;AP-2 adaptor complex binding;clathrin adaptor activity;protein homodimerization…	GO:0030136;GO:0005634;GO:0005737;GO:0016020;GO:0043231;GO:0031410;GO:0005829;GO:0012505;GO:0005634;GO:0005737;GO:0030665;GO:0030122;GO:0005737;GO:0005794;GO:0005856;GO:0016020;GO:0030136;GO:0031234;GO:0098793;GO:0098793;GO:0098794;GO:0098794;GO:0098888;GO:0098890;GO:0030136;GO:0005634;GO:0005737;GO:0016020;GO:0043231;GO:0031410;GO:0005829;GO:0012505;GO:0005634;GO:0005737;GO:0030665;GO:0030122;GO:…	clathrin-coated vesicle;nucleus;cytoplasm;membrane;intracellular membrane-bounded organelle;cytoplasmic vesicle;cytosol;endomembrane system;nucleus;cytoplasm;clathrin-coated vesicle membrane;AP-2 adaptor complex;cytoplasm;Golgi apparatus;cytoskeleton;membrane;clathrin-coated vesicle;extrinsic component of cytoplasmic side of plasma membrane;presynapse;presynapse;postsynapse;postsynapse;extrinsic …
MME	3.72955	1.899	1.75673e-18	2.20322e-16	MME	GO:0006508;GO:0006508;GO:0043312;GO:0071493;GO:0001822;GO:0071345;GO:0019233;GO:0002003;GO:0097242;GO:0090399;GO:0006518;GO:0046449;GO:0050435;GO:0071492;GO:0006508;GO:0006508;GO:0043312;GO:0071493;GO:0001822;GO:0071345;GO:0019233;GO:0002003;GO:0097242;GO:0090399;GO:0006518;GO:0006518;GO:0019233;GO:0046449;GO:0050435;GO:0050435;GO:0071492;GO:0097242;GO:0006508;GO:0006508;GO:0006508;GO:0006508;GO:…	proteolysis;proteolysis;neutrophil degranulation;cellular response to UV-B;kidney development;cellular response to cytokine stimulus;sensory perception of pain;angiotensin maturation;amyloid-beta clearance;replicative senescence;peptide metabolic process;creatinine metabolic process;amyloid-beta metabolic process;cellular response to UV-A;proteolysis;proteolysis;neutrophil degranulation;cellular …	GO:0004222;GO:0008237;GO:0046872;GO:0016787;GO:0008270;GO:0005515;GO:0008233;GO:0004222;GO:0004222;GO:0004175;GO:0004175;GO:0008237;GO:0042277;GO:0008238;GO:0004222;GO:0008237;GO:0046872;GO:0016787;GO:0008270;GO:0005515;GO:0008233;GO:0004222;GO:0004222;GO:0004175;GO:0004175;GO:0008237;GO:0042277;GO:0008238;GO:0042277;GO:0004222;GO:0004222;GO:0004222;GO:0008237;GO:0046872;GO:0016787;GO:0008270;GO:…	metalloendopeptidase activity;metallopeptidase activity;metal ion binding;hydrolase activity;zinc ion binding;protein binding;peptidase activity;metalloendopeptidase activity;metalloendopeptidase activity;endopeptidase activity;endopeptidase activity;metallopeptidase activity;peptide binding;exopeptidase activity;metalloendopeptidase activity;metallopeptidase activity;metal ion binding;hydrolase …	GO:0005737;GO:0016020;GO:0016021;GO:0016021;GO:0005886;GO:0005886;GO:0045202;GO:0005925;GO:0030425;GO:0005886;GO:0005887;GO:0030424;GO:0070062;GO:0005903;GO:0030667;GO:0008021;GO:0044306;GO:0005737;GO:0016020;GO:0016021;GO:0016021;GO:0005886;GO:0005886;GO:0045202;GO:0005925;GO:0030425;GO:0005886;GO:0005887;GO:0030424;GO:0070062;GO:0005903;GO:0030667;GO:0008021;GO:0008021;GO:0030424;GO:0030425;GO:…	cytoplasm;membrane;integral component of membrane;integral component of membrane;plasma membrane;plasma membrane;synapse;focal adhesion;dendrite;plasma membrane;integral component of plasma membrane;axon;extracellular exosome;brush border;secretory granule membrane;synaptic vesicle;neuron projection terminus;cytoplasm;membrane;integral component of membrane;integral component of membrane;plasma m…
GEM	0.32421	-1.625	2.64636e-18	3.28641e-16	GEM	GO:0007165;GO:1901842;GO:0006955;GO:0007165;GO:0007166;GO:0000278;GO:0051310;GO:0051276;GO:0007165;GO:1901842;GO:0006955;GO:0007165;GO:0007166;GO:0000278;GO:0051310;GO:0051276;GO:0007165	signal transduction;negative regulation of high voltage-gated calcium channel activity;immune response;signal transduction;cell surface receptor signaling pathway;mitotic cell cycle;metaphase plate congression;chromosome organization;signal transduction;negative regulation of high voltage-gated calcium channel activity;immune response;signal transduction;cell surface receptor signaling pathway;mi…	GO:0005525;GO:0003924;GO:0000166;GO:0005515;GO:0005516;GO:0005525;GO:0005525;GO:0003924;GO:0000287;GO:0019003;GO:0005525;GO:0003924;GO:0000166;GO:0005515;GO:0005516;GO:0005525;GO:0005525;GO:0003924;GO:0000287;GO:0019003;GO:0005525	GTP binding;GTPase activity;nucleotide binding;protein binding;calmodulin binding;GTP binding;GTP binding;GTPase activity;magnesium ion binding;GDP binding;GTP binding;GTPase activity;nucleotide binding;protein binding;calmodulin binding;GTP binding;GTP binding;GTPase activity;magnesium ion binding;GDP binding;GTP binding	GO:0016020;GO:0005886;GO:0030496;GO:0051233;GO:0009898;GO:0072686;GO:0016020;GO:0005886;GO:0005634;GO:0030496;GO:0051233;GO:0009898;GO:0072686;GO:0016020	membrane;plasma membrane;midbody;spindle midzone;cytoplasmic side of plasma membrane;mitotic spindle;membrane;plasma membrane;nucleus;midbody;spindle midzone;cytoplasmic side of plasma membrane;mitotic spindle;membrane
FAM20C	0.444113	-1.171	4.5861e-18	5.58578e-16	FAM20C	GO:0016310;GO:0031214;GO:0031214;GO:0044267;GO:0043687;GO:0006468;GO:0001501;GO:0006468;GO:0030501;GO:0036179;GO:0040036;GO:0045669;GO:0046034;GO:0051174;GO:0070166;GO:0071895;GO:0097187	phosphorylation;biomineral tissue development;biomineral tissue development;cellular protein metabolic process;post-translational protein modification;protein phosphorylation;skeletal system development;protein phosphorylation;positive regulation of bone mineralization;osteoclast maturation;regulation of fibroblast growth factor receptor signaling pathway;positive regulation of osteoblast differe…	GO:0046872;GO:0000166;GO:0004674;GO:0004674;GO:0005524;GO:0016740;GO:0016301;GO:0005515;GO:0004674;GO:0030145;GO:0005509	metal ion binding;nucleotide binding;protein serine/threonine kinase activity;protein serine/threonine kinase activity;ATP binding;transferase activity;kinase activity;protein binding;protein serine/threonine kinase activity;manganese ion binding;calcium ion binding	GO:0005794;GO:0005794;GO:0005576;GO:0005615;GO:0070062;GO:0005788;GO:0005615;GO:0005737	Golgi apparatus;Golgi apparatus;extracellular region;extracellular space;extracellular exosome;endoplasmic reticulum lumen;extracellular space;cytoplasm
GLUL	5.16941	2.37	4.65841e-18	5.60018e-16	GLUL	GO:0006807;GO:0006542;GO:0006807;GO:0006542;GO:0008283;GO:0008652;GO:0006538;GO:0001504;GO:0006542;GO:0006807;GO:0006542;GO:0008283;GO:0008652;GO:0006538;GO:0001504;GO:0006542;GO:0006807;GO:0006542;GO:0008283;GO:0006536;GO:0009267;GO:0009749;GO:0019676;GO:0032024;GO:0050679;GO:0051260;GO:0051968;GO:0008652;GO:0006538;GO:0001504;GO:0006542;GO:0006807;GO:0006542;GO:0008283;GO:0008652;GO:0006538;GO:…	nitrogen compound metabolic process;glutamine biosynthetic process;nitrogen compound metabolic process;glutamine biosynthetic process;cell proliferation;cellular amino acid biosynthetic process;glutamate catabolic process;neurotransmitter uptake;glutamine biosynthetic process;nitrogen compound metabolic process;glutamine biosynthetic process;cell proliferation;cellular amino acid biosynthetic pro…	GO:0003824;GO:0004356;GO:0003824;GO:0004356;GO:0000166;GO:0005524;GO:0016829;GO:0016874;GO:0005515;GO:0042802;GO:0004351;GO:0004356;GO:0003824;GO:0004356;GO:0000166;GO:0005524;GO:0016829;GO:0016874;GO:0005515;GO:0042802;GO:0004351;GO:0004356;GO:0003824;GO:0004356;GO:0000166;GO:0005524;GO:0016829;GO:0016874;GO:0005515;GO:0042802;GO:0000287;GO:0016595;GO:0030145;GO:0045503;GO:0004351;GO:0004356;GO:…	catalytic activity;glutamate-ammonia ligase activity;catalytic activity;glutamate-ammonia ligase activity;nucleotide binding;ATP binding;lyase activity;ligase activity;protein binding;identical protein binding;glutamate decarboxylase activity;glutamate-ammonia ligase activity;catalytic activity;glutamate-ammonia ligase activity;nucleotide binding;ATP binding;lyase activity;ligase activity;protein…	GO:0005634;GO:0005737;GO:0005829;GO:0005739;GO:0005739;GO:0005829;GO:0070062;GO:0005634;GO:0005737;GO:0005829;GO:0005739;GO:0005739;GO:0005829;GO:0070062;GO:0005634;GO:0005737;GO:0005829;GO:0005739;GO:0005739;GO:0005829;GO:0070062;GO:0005791;GO:0042995;GO:0043005;GO:0043204;GO:0043209;GO:0043231;GO:0043679;GO:0044297;GO:0097386;GO:0005634;GO:0005737;GO:0005829;GO:0005739;GO:0005739;GO:0005829;GO:…	nucleus;cytoplasm;cytosol;mitochondrion;mitochondrion;cytosol;extracellular exosome;nucleus;cytoplasm;cytosol;mitochondrion;mitochondrion;cytosol;extracellular exosome;nucleus;cytoplasm;cytosol;mitochondrion;mitochondrion;cytosol;extracellular exosome;rough endoplasmic reticulum;cell projection;neuron projection;perikaryon;myelin sheath;intracellular membrane-bounded organelle;axon terminus;cell …
MPPED2	0.300409	-1.735	4.68635e-18	5.60018e-16	MPPED2	GO:0007399;GO:0007399	nervous system development;nervous system development	GO:0016787;GO:0046872;GO:0005515;GO:0016787;GO:0046872;GO:0005515	hydrolase activity;metal ion binding;protein binding;hydrolase activity;metal ion binding;protein binding	NA	NA
GADD45B	2.62624	1.393	4.94777e-18	5.85732e-16	GADD45B	GO:0006950;GO:0051726;GO:0006915;GO:0007275;GO:0030154;GO:0043065;GO:0046330;GO:0000185;GO:0000186;GO:0006469;GO:0051726;GO:1900745;GO:0051726;GO:0006950;GO:0006950;GO:0051726;GO:0006950;GO:0051726;GO:0006950;GO:0051726	response to stress;regulation of cell cycle;apoptotic process;multicellular organism development;cell differentiation;positive regulation of apoptotic process;positive regulation of JNK cascade;activation of MAPKKK activity;activation of MAPKK activity;negative regulation of protein kinase activity;regulation of cell cycle;positive regulation of p38MAPK cascade;regulation of cell cycle;response t…	GO:0005515	protein binding	GO:0005634;GO:0005634;GO:0005737;GO:0005634;GO:0005634;GO:0005634;GO:0005634	nucleus;nucleus;cytoplasm;nucleus;nucleus;nucleus;nucleus
FENDRR	0.350625	-1.512	1.11012e-17	1.30203e-15	FENDRR	NA	NA	NA	NA	NA	NA
ALPP	13.7085	3.777	1.13871e-17	1.32331e-15	ALPP	GO:0008152;GO:0016311	metabolic process;dephosphorylation	GO:0016791;GO:0003824;GO:0046872;GO:0016787;GO:0008270;GO:0005515;GO:0000287;GO:0004035;GO:0004035;GO:0004035	phosphatase activity;catalytic activity;metal ion binding;hydrolase activity;zinc ion binding;protein binding;magnesium ion binding;alkaline phosphatase activity;alkaline phosphatase activity;alkaline phosphatase activity	GO:0016020;GO:0016021;GO:0005886;GO:0005886;GO:0031225;GO:0009986	membrane;integral component of membrane;plasma membrane;plasma membrane;anchored component of membrane;cell surface
CHIC2	3.06737	1.617	1.32586e-17	1.52678e-15	CHIC2	GO:0008150;GO:0006893	biological_process;Golgi to plasma membrane transport	GO:0005515;GO:0003674	protein binding;molecular_function	GO:0016020;GO:0043231;GO:0005886;GO:0005886;GO:0031410;GO:0005886;GO:0005575;GO:0005794;GO:0005798;GO:0005798;GO:0043231;GO:0005886;GO:0043231;GO:0005886	membrane;intracellular membrane-bounded organelle;plasma membrane;plasma membrane;cytoplasmic vesicle;plasma membrane;cellular_component;Golgi apparatus;Golgi-associated vesicle;Golgi-associated vesicle;intracellular membrane-bounded organelle;plasma membrane;intracellular membrane-bounded organelle;plasma membrane
MAOA	8.33395	3.059	1.34935e-17	1.53984e-15	MAOA	GO:0055114;GO:0019221;GO:0006576;GO:0006584;GO:0042133;GO:0042135;GO:0042420;GO:0042420;GO:0055114;GO:0019221;GO:0006576;GO:0006584;GO:0042133;GO:0042135;GO:0042420	oxidation-reduction process;cytokine-mediated signaling pathway;cellular biogenic amine metabolic process;catecholamine metabolic process;neurotransmitter metabolic process;neurotransmitter catabolic process;dopamine catabolic process;dopamine catabolic process;oxidation-reduction process;cytokine-mediated signaling pathway;cellular biogenic amine metabolic process;catecholamine metabolic process…	GO:0016491;GO:0008131;GO:0008131;GO:0016491;GO:0008131	oxidoreductase activity;primary amine oxidase activity;primary amine oxidase activity;oxidoreductase activity;primary amine oxidase activity	GO:0016020;GO:0016021;GO:0005739;GO:0005739;GO:0005739;GO:0005741;GO:0005741;GO:0016020;GO:0016021;GO:0005739;GO:0005739;GO:0005739;GO:0005741;GO:0005741	membrane;integral component of membrane;mitochondrion;mitochondrion;mitochondrion;mitochondrial outer membrane;mitochondrial outer membrane;membrane;integral component of membrane;mitochondrion;mitochondrion;mitochondrion;mitochondrial outer membrane;mitochondrial outer membrane
LGR4	0.350625	-1.512	1.52179e-17	1.72112e-15	LGR4	GO:0007186;GO:0007165;GO:0048511;GO:0007275;GO:0016055;GO:0030154;GO:0002376;GO:0045087;GO:0007283;GO:0007283;GO:0030282;GO:0090263;GO:0032922;GO:0001649;GO:0046849;GO:0050710;GO:0034122;GO:0001649;GO:0001942;GO:0007623;GO:0030282;GO:0030539;GO:0032922;GO:0034122;GO:0035239;GO:0036335;GO:0045892;GO:0045893;GO:0046849;GO:0048565;GO:0050673;GO:0050710;GO:0061290;GO:0072202;GO:0072224;GO:0072282;GO:…	G-protein coupled receptor signaling pathway;signal transduction;rhythmic process;multicellular organism development;Wnt signaling pathway;cell differentiation;immune system process;innate immune response;spermatogenesis;spermatogenesis;bone mineralization;positive regulation of canonical Wnt signaling pathway;circadian regulation of gene expression;osteoblast differentiation;bone remodeling;nega…	GO:0005515;GO:0004930;GO:0016500;GO:0005515;GO:0004871;GO:0004930;GO:0004888;GO:0004888;GO:0005515;GO:0004930;GO:0016500;GO:0005515;GO:0004871;GO:0004930;GO:0004888;GO:0005515	protein binding;G-protein coupled receptor activity;protein-hormone receptor activity;protein binding;signal transducer activity;G-protein coupled receptor activity;transmembrane signaling receptor activity;transmembrane signaling receptor activity;protein binding;G-protein coupled receptor activity;protein-hormone receptor activity;protein binding;signal transducer activity;G-protein coupled rec…	GO:0016021;GO:0016020;GO:0005886;GO:0005886;GO:0005887;GO:0005887;GO:0016021;GO:0016020;GO:0005886;GO:0005886;GO:0005887	integral component of membrane;membrane;plasma membrane;plasma membrane;integral component of plasma membrane;integral component of plasma membrane;integral component of membrane;membrane;plasma membrane;plasma membrane;integral component of plasma membrane
ZSCAN31	0.167357	-2.579	1.92945e-17	2.16286e-15	ZSCAN31	GO:0006355;GO:0006351;GO:0006355;GO:0006351;GO:0006355;GO:0006351;GO:0006355;GO:0006351;GO:0006355;GO:0006351;GO:0006355;GO:0006355;GO:0006355;GO:0006355;GO:0006355;GO:0006355;GO:0006355;GO:0006351	regulation of transcription, DNA-templated;transcription, DNA-templated;regulation of transcription, DNA-templated;transcription, DNA-templated;regulation of transcription, DNA-templated;transcription, DNA-templated;regulation of transcription, DNA-templated;transcription, DNA-templated;regulation of transcription, DNA-templated;transcription, DNA-templated;regulation of transcription, DNA-templa…	GO:0003700;GO:0003676;GO:0046872;GO:0003677;GO:0003700;GO:0003676;GO:0046872;GO:0003677;GO:0003700;GO:0003676;GO:0046872;GO:0003677;GO:0003676;GO:0046872;GO:0003677;GO:0003700;GO:0003700;GO:0003676;GO:0046872;GO:0003677;GO:0003676;GO:0003676;GO:0003700;GO:0003700;GO:0003700;GO:0003700;GO:0003700;GO:0003700;GO:0003676;GO:0046872;GO:0003677;GO:0003700	DNA binding transcription factor activity;nucleic acid binding;metal ion binding;DNA binding;DNA binding transcription factor activity;nucleic acid binding;metal ion binding;DNA binding;DNA binding transcription factor activity;nucleic acid binding;metal ion binding;DNA binding;nucleic acid binding;metal ion binding;DNA binding;DNA binding transcription factor activity;DNA binding transcription f…	GO:0005634;GO:0005634;GO:0005634;GO:0005634;GO:0005634;GO:0005634;GO:0005634;GO:0005634;GO:0005634;GO:0005634;GO:0005634;GO:0005634	nucleus;nucleus;nucleus;nucleus;nucleus;nucleus;nucleus;nucleus;nucleus;nucleus;nucleus;nucleus
HES7	4.24864	2.087	2.03316e-17	2.25913e-15	HES7	GO:0006355;GO:0000122;GO:0007219;GO:0006351;GO:0007275;GO:0007498;GO:0001501;GO:0001756;GO:0014807;GO:0036342;GO:0045892;GO:0048511;GO:0006355;GO:0000122;GO:0007219;GO:0006351;GO:0007275;GO:0007498;GO:0006355;GO:0000122;GO:0007219;GO:0006351	regulation of transcription, DNA-templated;negative regulation of transcription from RNA polymerase II promoter;Notch signaling pathway;transcription, DNA-templated;multicellular organism development;mesoderm development;skeletal system development;somitogenesis;regulation of somitogenesis;post-anal tail morphogenesis;negative regulation of transcription, DNA-templated;rhythmic process;regulation…	GO:0003677;GO:0046983;GO:0003677;GO:0000981;GO:0000981;GO:0008134;GO:0000977;GO:0003677;GO:0046983;GO:0003677;GO:0000981;GO:0000981;GO:0008134;GO:0003677;GO:0046983	DNA binding;protein dimerization activity;DNA binding;RNA polymerase II transcription factor activity, sequence-specific DNA binding;RNA polymerase II transcription factor activity, sequence-specific DNA binding;transcription factor binding;RNA polymerase II regulatory region sequence-specific DNA binding;DNA binding;protein dimerization activity;DNA binding;RNA polymerase II transcription factor…	GO:0005634;GO:0005634;GO:0005634;GO:0005634;GO:0005634	nucleus;nucleus;nucleus;nucleus;nucleus
APCDD1	5.74378	2.522	2.78581e-17	3.0685e-15	APCDD1	GO:0016055;GO:0030178;GO:0001942;GO:0043615	Wnt signaling pathway;negative regulation of Wnt signaling pathway;hair follicle development;astrocyte cell migration	GO:0005515;GO:0042802;GO:0017147	protein binding;identical protein binding;Wnt-protein binding	GO:0016020;GO:0016021;GO:0005886;GO:0005887	membrane;integral component of membrane;plasma membrane;integral component of plasma membrane
CNN2	2.08782	1.062	2.94013e-17	3.21057e-15	CNN2	GO:0007010;GO:0031032;GO:0043312;GO:0035722;GO:0007010;GO:0032970;GO:0071260;GO:0007010;GO:0007010;GO:0031032;GO:0043312;GO:0035722;GO:0007010;GO:0032970;GO:0071260;GO:0007010;GO:0031032;GO:0007010;GO:0031032;GO:0007010;GO:0031032;GO:0010628;GO:0030097;GO:0030336;GO:0042060;GO:0042127;GO:0050765;GO:0007010;GO:0031032;GO:0007010;GO:0007010;GO:0031032;GO:0007010;GO:0031032;GO:0007010;GO:0031032	cytoskeleton organization;actomyosin structure organization;neutrophil degranulation;interleukin-12-mediated signaling pathway;cytoskeleton organization;regulation of actin filament-based process;cellular response to mechanical stimulus;cytoskeleton organization;cytoskeleton organization;actomyosin structure organization;neutrophil degranulation;interleukin-12-mediated signaling pathway;cytoskele…	GO:0005515;GO:0003779;GO:0005516;GO:0045296;GO:0003779;GO:0005515;GO:0003779;GO:0005515;GO:0003779;GO:0005516;GO:0045296;GO:0003779;GO:0005515;GO:0003779;GO:0005516;GO:0003779;GO:0005515;GO:0003779;GO:0005516;GO:0005515;GO:0003779;GO:0005516;GO:0005515;GO:0003779;GO:0003779;GO:0005515;GO:0003779;GO:0005516;GO:0005515;GO:0003779;GO:0005516	protein binding;actin binding;calmodulin binding;cadherin binding;actin binding;protein binding;actin binding;protein binding;actin binding;calmodulin binding;cadherin binding;actin binding;protein binding;actin binding;calmodulin binding;actin binding;protein binding;actin binding;calmodulin binding;protein binding;actin binding;calmodulin binding;protein binding;actin binding;actin binding;prot…	GO:0005856;GO:0016020;GO:0005925;GO:0005576;GO:0070062;GO:0005856;GO:0035580;GO:1904724;GO:0005911;GO:0001725;GO:0005856;GO:0005856;GO:0016020;GO:0005925;GO:0005576;GO:0070062;GO:0005856;GO:0035580;GO:1904724;GO:0005911;GO:0001725;GO:0005856;GO:0005856;GO:0005856;GO:0005856;GO:0005856;GO:0005856;GO:0005856;GO:0005856	cytoskeleton;membrane;focal adhesion;extracellular region;extracellular exosome;cytoskeleton;specific granule lumen;tertiary granule lumen;cell-cell junction;stress fiber;cytoskeleton;cytoskeleton;membrane;focal adhesion;extracellular region;extracellular exosome;cytoskeleton;specific granule lumen;tertiary granule lumen;cell-cell junction;stress fiber;cytoskeleton;cytoskeleton;cytoskeleton;cytos…
SH3RF3	3.68841	1.883	5.49905e-17	5.95354e-15	SH3RF3	NA	NA	GO:0005515;GO:0046872;GO:0005515	protein binding;metal ion binding;protein binding	NA	NA
PRR16	3.45097	1.787	7.08231e-17	7.60268e-15	PRR16	GO:0045727;GO:0045793;GO:0045793;GO:0045727;GO:0045793;GO:0045727;GO:0045793	positive regulation of translation;positive regulation of cell size;positive regulation of cell size;positive regulation of translation;positive regulation of cell size;positive regulation of translation;positive regulation of cell size	GO:0005515;GO:0005515;GO:0005515	protein binding;protein binding;protein binding	NA	NA
DPYSL3	0.394473	-1.342	7.57304e-17	8.06115e-15	DPYSL3	GO:0030334;GO:0051017;GO:0010975;GO:0048678;GO:0051491;GO:0051260;GO:0051017;GO:0051491;GO:0030336;GO:0010976;GO:0010977;GO:0071345;GO:0048678;GO:0051764;GO:0030334;GO:0051017;GO:0010975;GO:0048678;GO:0051491;GO:0010976;GO:0010977;GO:0030336;GO:0048666;GO:0051260;GO:0051764;GO:0051260;GO:0051017;GO:0051491;GO:0030336;GO:0010976;GO:0010977;GO:0071345;GO:0048678;GO:0051764;GO:0030334;GO:0051017;GO:…	regulation of cell migration;actin filament bundle assembly;regulation of neuron projection development;response to axon injury;positive regulation of filopodium assembly;protein homooligomerization;actin filament bundle assembly;positive regulation of filopodium assembly;negative regulation of cell migration;positive regulation of neuron projection development;negative regulation of neuron proje…	GO:0016787;GO:0016810;GO:0005515;GO:0017124;GO:0035374;GO:0031005;GO:0016787;GO:0016810;GO:0005515;GO:0017124;GO:0035374;GO:0017124;GO:0035374;GO:0031005;GO:0016787;GO:0016810;GO:0016810	hydrolase activity;hydrolase activity, acting on carbon-nitrogen (but not peptide) bonds;protein binding;SH3 domain binding;chondroitin sulfate binding;filamin binding;hydrolase activity;hydrolase activity, acting on carbon-nitrogen (but not peptide) bonds;protein binding;SH3 domain binding;chondroitin sulfate binding;SH3 domain binding;chondroitin sulfate binding;filamin binding;hydrolase activi…	GO:0005737;GO:0005829;GO:0042995;GO:0005615;GO:0005829;GO:0030027;GO:0030426;GO:0030426;GO:0031941;GO:0044297;GO:0070382;GO:0005737;GO:0005829;GO:0042995;GO:0005615;GO:0005615;GO:0005829;GO:0030027;GO:0030426;GO:0031941;GO:0044297;GO:0070382;GO:0005829;GO:0030027;GO:0030426;GO:0031941;GO:0044297;GO:0070382	cytoplasm;cytosol;cell projection;extracellular space;cytosol;lamellipodium;growth cone;growth cone;filamentous actin;cell body;exocytic vesicle;cytoplasm;cytosol;cell projection;extracellular space;extracellular space;cytosol;lamellipodium;growth cone;filamentous actin;cell body;exocytic vesicle;cytosol;lamellipodium;growth cone;filamentous actin;cell body;exocytic vesicle
PTX3	3.2065	1.681	7.68895e-17	8.11633e-15	PTX3	GO:0043312;GO:0006954;GO:0045087;GO:0046597;GO:0044869;GO:0044871;GO:1903016;GO:1903019;GO:0001878;GO:0008228;GO:0045429;GO:0050766	neutrophil degranulation;inflammatory response;innate immune response;negative regulation of viral entry into host cell;negative regulation by host of viral exo-alpha-sialidase activity;negative regulation by host of viral glycoprotein metabolic process;negative regulation of exo-alpha-sialidase activity;negative regulation of glycoprotein metabolic process;response to yeast;opsonization;positive…	GO:0005515;GO:0042802;GO:0001849;GO:0046790;GO:0001872	protein binding;identical protein binding;complement component C1q binding;virion binding;(1->3)-beta-D-glucan binding	GO:0005576;GO:0005576;GO:0005615;GO:0035580;GO:1904724;GO:0005615	extracellular region;extracellular region;extracellular space;specific granule lumen;tertiary granule lumen;extracellular space
CRYAB	15.9336	3.994	1.01473e-16	1.06228e-14	CRYAB	GO:0051260;GO:0006936;GO:1900034;GO:0006457;GO:0071480;GO:1905907;GO:1905907;GO:0032387;GO:0043066;GO:0050821;GO:0010941;GO:0032463;GO:0051260;GO:0006936;GO:1900034;GO:0006457;GO:0071480;GO:1905907;GO:1905907;GO:0032387;GO:0043066;GO:0050821;GO:0001666;GO:0002088;GO:0006457;GO:0007021;GO:0007517;GO:0007568;GO:0010629;GO:0010941;GO:0030308;GO:0031109;GO:0032355;GO:0032463;GO:0042542;GO:0043010;GO:…	protein homooligomerization;muscle contraction;regulation of cellular response to heat;protein folding;cellular response to gamma radiation;negative regulation of amyloid fibril formation;negative regulation of amyloid fibril formation;negative regulation of intracellular transport;negative regulation of apoptotic process;protein stabilization;regulation of cell death;negative regulation of prote…	GO:0005212;GO:0046872;GO:0042803;GO:0005515;GO:0042802;GO:0051082;GO:0044877;GO:0001540;GO:0005212;GO:0046872;GO:0042803;GO:0005515;GO:0042802;GO:0051082;GO:0044877;GO:0001540;GO:0008017;GO:0008092;GO:0005212;GO:0046872;GO:0042803;GO:0005515;GO:0042802;GO:0051082;GO:0044877;GO:0001540;GO:0005212;GO:0046872;GO:0042803;GO:0005515;GO:0042802;GO:0051082;GO:0044877;GO:0001540;GO:0005212;GO:0046872;GO:…	structural constituent of eye lens;metal ion binding;protein homodimerization activity;protein binding;identical protein binding;unfolded protein binding;macromolecular complex binding;amyloid-beta binding;structural constituent of eye lens;metal ion binding;protein homodimerization activity;protein binding;identical protein binding;unfolded protein binding;macromolecular complex binding;amyloid-…	GO:0005634;GO:0005634;GO:0005737;GO:0005737;GO:0005654;GO:0070062;GO:0005634;GO:0005634;GO:0005737;GO:0005737;GO:0005654;GO:0070062;GO:0005739;GO:0005794;GO:0005829;GO:0005886;GO:0009986;GO:0014069;GO:0015630;GO:0030018;GO:0030424;GO:0031430;GO:0031674;GO:0032432;GO:0043197;GO:0043204;GO:0043209;GO:0043292;GO:0045202;GO:0097060;GO:0097512;GO:0005634;GO:0005634;GO:0005737;GO:0005737;GO:0005654;GO:…	nucleus;nucleus;cytoplasm;cytoplasm;nucleoplasm;extracellular exosome;nucleus;nucleus;cytoplasm;cytoplasm;nucleoplasm;extracellular exosome;mitochondrion;Golgi apparatus;cytosol;plasma membrane;cell surface;postsynaptic density;microtubule cytoskeleton;Z disc;axon;M band;I band;actin filament bundle;dendritic spine;perikaryon;myelin sheath;contractile fiber;synapse;synaptic membrane;cardiac myofi…
LINC00536	0.184667	-2.437	1.18242e-16	1.22769e-14	LINC00536	NA	NA	NA	NA	NA	NA
SLC26A2	2.67957	1.422	1.65803e-16	1.7075e-14	SLC26A2	GO:0006811;GO:0055085;GO:0008272;GO:0001503;GO:1902358;GO:0006811;GO:1902476;GO:0050428;GO:0015701;GO:0019532;GO:0042391;GO:0051453;GO:1902358;GO:0006811;GO:0055085;GO:0008272;GO:0001503;GO:1902358	ion transport;transmembrane transport;sulfate transport;ossification;sulfate transmembrane transport;ion transport;chloride transmembrane transport;3'-phosphoadenosine 5'-phosphosulfate biosynthetic process;bicarbonate transport;oxalate transport;regulation of membrane potential;regulation of intracellular pH;sulfate transmembrane transport;ion transport;transmembrane transport;sulfate transport;…	GO:0008271;GO:0015116;GO:0005254;GO:0015106;GO:0015116;GO:0015301;GO:0019531;GO:0015116;GO:0008271;GO:0015116	secondary active sulfate transmembrane transporter activity;sulfate transmembrane transporter activity;chloride channel activity;bicarbonate transmembrane transporter activity;sulfate transmembrane transporter activity;anion:anion antiporter activity;oxalate transmembrane transporter activity;sulfate transmembrane transporter activity;secondary active sulfate transmembrane transporter activity;su…	GO:0016021;GO:0016020;GO:0005886;GO:0005886;GO:0005887;GO:0070062;GO:0005887;GO:0016020;GO:0016324;GO:0031528;GO:0016021;GO:0016020	integral component of membrane;membrane;plasma membrane;plasma membrane;integral component of plasma membrane;extracellular exosome;integral component of plasma membrane;membrane;apical plasma membrane;microvillus membrane;integral component of membrane;membrane
NIPAL2	24.9679	4.642	1.73493e-16	1.77228e-14	NIPAL2	GO:0015693;GO:1903830;GO:0015693;GO:0015693;GO:1903830;GO:0015693	magnesium ion transport;magnesium ion transmembrane transport;magnesium ion transport;magnesium ion transport;magnesium ion transmembrane transport;magnesium ion transport	GO:0015095;GO:0015095	magnesium ion transmembrane transporter activity;magnesium ion transmembrane transporter activity	GO:0016021;GO:0016020;GO:0016020;GO:0016021;GO:0016020;GO:0016020	integral component of membrane;membrane;membrane;integral component of membrane;membrane;membrane
FN1	4	2	1.9521e-16	1.97818e-14	FN1	GO:0007155;GO:0007155;GO:0050900;GO:0010952;GO:0010628;GO:0044267;GO:0043687;GO:0001525;GO:0008360;GO:0006953;GO:0008284;GO:0002576;GO:0019221;GO:0030198;GO:0022617;GO:0033622;GO:0034446;GO:0048146;GO:0001932;GO:0009611;GO:0034446;GO:0070372;GO:0051702;GO:0018149;GO:0035987;GO:0052047;GO:1904237;GO:2001202;GO:0007155;GO:0007155;GO:0050900;GO:0010952;GO:0010628;GO:0044267;GO:0043687;GO:0001525;GO:…	cell adhesion;cell adhesion;leukocyte migration;positive regulation of peptidase activity;positive regulation of gene expression;cellular protein metabolic process;post-translational protein modification;angiogenesis;regulation of cell shape;acute-phase response;positive regulation of cell proliferation;platelet degranulation;cytokine-mediated signaling pathway;extracellular matrix organization;e…	GO:0005515;GO:0005515;GO:0042802;GO:0008201;GO:0008201;GO:0005178;GO:0005178;GO:0005178;GO:0005518;GO:0002020;GO:0097718;GO:0019899;GO:0051087;GO:0005102;GO:0008022;GO:0005515;GO:0005515;GO:0042802;GO:0008201;GO:0008201;GO:0005178;GO:0005178;GO:0005178;GO:0005518;GO:0002020;GO:0097718;GO:0019899;GO:0051087;GO:0005102;GO:0008022;GO:0005515;GO:0005515;GO:0042802;GO:0008201;GO:0008201;GO:0005178;GO:…	protein binding;protein binding;identical protein binding;heparin binding;heparin binding;integrin binding;integrin binding;integrin binding;collagen binding;protease binding;disordered domain specific binding;enzyme binding;chaperone binding;receptor binding;protein C-terminus binding;protein binding;protein binding;identical protein binding;heparin binding;heparin binding;integrin binding;integ…	GO:0005576;GO:0005576;GO:0005578;GO:0005576;GO:0005615;GO:0070062;GO:0070062;GO:0031012;GO:0031012;GO:0072562;GO:0005578;GO:0031012;GO:0005788;GO:0031093;GO:0005793;GO:0005576;GO:0005577;GO:0005576;GO:0005576;GO:0005578;GO:0005576;GO:0005615;GO:0070062;GO:0070062;GO:0031012;GO:0031012;GO:0072562;GO:0005578;GO:0031012;GO:0005788;GO:0031093;GO:0005793;GO:0005576;GO:0005577;GO:0005576;GO:0005576;GO:…	extracellular region;extracellular region;proteinaceous extracellular matrix;extracellular region;extracellular space;extracellular exosome;extracellular exosome;extracellular matrix;extracellular matrix;blood microparticle;proteinaceous extracellular matrix;extracellular matrix;endoplasmic reticulum lumen;platelet alpha granule lumen;endoplasmic reticulum-Golgi intermediate compartment;extracell…
ZFP36L2	3.09513	1.63	2.17599e-16	2.18757e-14	ZFP36L2	GO:0007275;GO:0006355;GO:0006357;GO:0061158;GO:0061158;GO:1900153;GO:0071356;GO:0070371;GO:0045599;GO:0071560;GO:0008283;GO:0030097;GO:0044344;GO:0009611;GO:0071364;GO:0006402;GO:2000737;GO:0071385;GO:0043488;GO:0043488;GO:0060216;GO:0033077;GO:0097011;GO:0000165;GO:0000288;GO:0006402;GO:0030097;GO:0033077;GO:0035019;GO:0035019;GO:0043488;GO:0044344;GO:0045577;GO:0045577;GO:0045599;GO:0048103;GO:…	multicellular organism development;regulation of transcription, DNA-templated;regulation of transcription from RNA polymerase II promoter;3'-UTR-mediated mRNA destabilization;3'-UTR-mediated mRNA destabilization;positive regulation of nuclear-transcribed mRNA catabolic process, deadenylation-dependent decay;cellular response to tumor necrosis factor;ERK1 and ERK2 cascade;negative regulation of fa…	GO:0046872;GO:0003723;GO:0003723;GO:0003677;GO:0005515;GO:0000981;GO:0003700;GO:0017091;GO:0035925;GO:0035925	metal ion binding;RNA binding;RNA binding;DNA binding;protein binding;RNA polymerase II transcription factor activity, sequence-specific DNA binding;DNA binding transcription factor activity;AU-rich element binding;mRNA 3'-UTR AU-rich region binding;mRNA 3'-UTR AU-rich region binding	GO:0005634;GO:0005634;GO:0005737;GO:0005737;GO:0030529;GO:0005829	nucleus;nucleus;cytoplasm;cytoplasm;intracellular ribonucleoprotein complex;cytosol
KIT	0.256495	-1.963	3.18217e-16	3.1739e-14	KIT	GO:0006468;GO:0007169;GO:0038093;GO:0038109;GO:0016310;GO:0030218;GO:0006954;GO:0007283;GO:0007283;GO:0038093;GO:0046854;GO:1905065;GO:0000165;GO:0008584;GO:0048863;GO:0008360;GO:0042127;GO:0007165;GO:0030032;GO:0002551;GO:0030217;GO:0043303;GO:0051897;GO:0060374;GO:0060374;GO:0046777;GO:0030097;GO:0060326;GO:0051091;GO:0019221;GO:0000187;GO:0031532;GO:0043410;GO:0014068;GO:0019827;GO:0042531;GO:…	protein phosphorylation;transmembrane receptor protein tyrosine kinase signaling pathway;Fc receptor signaling pathway;Kit signaling pathway;phosphorylation;erythrocyte differentiation;inflammatory response;spermatogenesis;spermatogenesis;Fc receptor signaling pathway;phosphatidylinositol phosphorylation;positive regulation of vascular smooth muscle cell differentiation;MAPK cascade;male gonad de…	GO:0005524;GO:0004672;GO:0004714;GO:0004713;GO:0019955;GO:0004716;GO:0046872;GO:0000166;GO:0016740;GO:0016301;GO:0042803;GO:0005515;GO:0004714;GO:0019955;GO:0046934;GO:0005088;GO:0004713;GO:0004716;GO:0005524;GO:0004672;GO:0004714;GO:0004713;GO:0019955;GO:0004716;GO:0046872;GO:0000166;GO:0016740;GO:0016301;GO:0042803;GO:0005515;GO:0004714;GO:0002020;GO:0005020;GO:0019955;GO:0046934;GO:0005088;GO:…	ATP binding;protein kinase activity;transmembrane receptor protein tyrosine kinase activity;protein tyrosine kinase activity;cytokine binding;signal transducer, downstream of receptor, with protein tyrosine kinase activity;metal ion binding;nucleotide binding;transferase activity;kinase activity;protein homodimerization activity;protein binding;transmembrane receptor protein tyrosine kinase activ…	GO:0005737;GO:0016020;GO:0016021;GO:0005886;GO:0005886;GO:0005886;GO:0042629;GO:0005615;GO:0005737;GO:0016020;GO:0016021;GO:0005886;GO:0005886;GO:0001669;GO:0005911;GO:0009897;GO:0009898;GO:0009986;GO:0005886;GO:0042629;GO:0005615	cytoplasm;membrane;integral component of membrane;plasma membrane;plasma membrane;plasma membrane;mast cell granule;extracellular space;cytoplasm;membrane;integral component of membrane;plasma membrane;plasma membrane;acrosomal vesicle;cell-cell junction;external side of plasma membrane;cytoplasmic side of plasma membrane;cell surface;plasma membrane;mast cell granule;extracellular space
OLFML2B	0.418413	-1.257	3.49552e-16	3.4592e-14	OLFML2B	GO:0030198	extracellular matrix organization	GO:0050840	extracellular matrix binding	GO:0005576;GO:0005578;GO:0005615;GO:0005576	extracellular region;proteinaceous extracellular matrix;extracellular space;extracellular region
PDGFRA	5.41139	2.436	4.55335e-16	4.47111e-14	PDGFRA	GO:0006468;GO:0007169;GO:0048008;GO:0016310;GO:0007275;GO:0048015;GO:0006935;GO:0046854;GO:0048008;GO:0030335;GO:0048146;GO:0000165;GO:0030335;GO:0016032;GO:0008284;GO:0070374;GO:0070527;GO:0051897;GO:0046777;GO:0007204;GO:0060326;GO:0042060;GO:2000249;GO:0014068;GO:0048701;GO:0048557;GO:0072277;GO:0018108;GO:0045740;GO:0043552;GO:2000587;GO:0010863;GO:0001775;GO:0038091;GO:0055003;GO:0061298;GO:…	protein phosphorylation;transmembrane receptor protein tyrosine kinase signaling pathway;platelet-derived growth factor receptor signaling pathway;phosphorylation;multicellular organism development;phosphatidylinositol-mediated signaling;chemotaxis;phosphatidylinositol phosphorylation;platelet-derived growth factor receptor signaling pathway;positive regulation of cell migration;positive regulati…	GO:0005524;GO:0004672;GO:0004714;GO:0004713;GO:0005018;GO:0000166;GO:0016740;GO:0016301;GO:0005515;GO:0004714;GO:0042803;GO:0046934;GO:0005088;GO:0005021;GO:0038085;GO:0004672;GO:0005161;GO:0048407;GO:0048407;GO:0005018;GO:0005018;GO:0048407;GO:0000166;GO:0004672;GO:0005524;GO:0016740;GO:0016301;GO:0004713;GO:0005515;GO:0004714;GO:0004714;GO:0042803;GO:0046934;GO:0005088;GO:0005021;GO:0038085;GO:…	ATP binding;protein kinase activity;transmembrane receptor protein tyrosine kinase activity;protein tyrosine kinase activity;platelet-derived growth factor alpha-receptor activity;nucleotide binding;transferase activity;kinase activity;protein binding;transmembrane receptor protein tyrosine kinase activity;protein homodimerization activity;phosphatidylinositol-4,5-bisphosphate 3-kinase activity;R…	GO:0005634;GO:0005737;GO:0016020;GO:0016020;GO:0016021;GO:0005634;GO:0005886;GO:0005886;GO:0030054;GO:0005886;GO:0032991;GO:0031226;GO:0005887;GO:0005634;GO:0005737;GO:0005902;GO:0009897;GO:0009986;GO:0005634;GO:0005737;GO:0016020;GO:0016020;GO:0016021;GO:0005634;GO:0005886;GO:0005886;GO:0030054;GO:0005886;GO:0032991;GO:0031226;GO:0005887;GO:0005634;GO:0005737;GO:0016020;GO:0016020;GO:0016021;GO:…	nucleus;cytoplasm;membrane;membrane;integral component of membrane;nucleus;plasma membrane;plasma membrane;cell junction;plasma membrane;macromolecular complex;intrinsic component of plasma membrane;integral component of plasma membrane;nucleus;cytoplasm;microvillus;external side of plasma membrane;cell surface;nucleus;cytoplasm;membrane;membrane;integral component of membrane;nucleus;plasma memb…
FOXL1	5.95046	2.573	4.72426e-16	4.60324e-14	FOXL1	GO:0006355;GO:0006355;GO:0006351;GO:0007275;GO:0006357;GO:0009653;GO:0030154;GO:0030111;GO:0007507;GO:0007495;GO:0007495;GO:0030111;GO:0030166;GO:0030166;GO:0061146	regulation of transcription, DNA-templated;regulation of transcription, DNA-templated;transcription, DNA-templated;multicellular organism development;regulation of transcription from RNA polymerase II promoter;anatomical structure morphogenesis;cell differentiation;regulation of Wnt signaling pathway;heart development;visceral mesoderm-endoderm interaction involved in midgut development;visceral …	GO:0003700;GO:0043565;GO:0003677;GO:0003700;GO:0043565;GO:0003677;GO:0003700;GO:0043565;GO:0000981;GO:0000981;GO:0003677;GO:0008301	DNA binding transcription factor activity;sequence-specific DNA binding;DNA binding;DNA binding transcription factor activity;sequence-specific DNA binding;DNA binding;DNA binding transcription factor activity;sequence-specific DNA binding;RNA polymerase II transcription factor activity, sequence-specific DNA binding;RNA polymerase II transcription factor activity, sequence-specific DNA binding;D…	GO:0005634;GO:0005634;GO:0005634;GO:0005634	nucleus;nucleus;nucleus;nucleus
TNFAIP8L3	5.11949	2.356	4.82995e-16	4.67031e-14	TNFAIP8L3	GO:0042981;GO:0006869;GO:0070374;GO:0019216;GO:0051897;GO:0015914;GO:0043552;GO:0006644;GO:0015914;GO:0019216;GO:0043552;GO:0048017;GO:0048017;GO:0051897;GO:0070374;GO:0042981	regulation of apoptotic process;lipid transport;positive regulation of ERK1 and ERK2 cascade;regulation of lipid metabolic process;positive regulation of protein kinase B signaling;phospholipid transport;positive regulation of phosphatidylinositol 3-kinase activity;phospholipid metabolic process;phospholipid transport;regulation of lipid metabolic process;positive regulation of phosphatidylinosit…	GO:0035091;GO:0008526;GO:0008526;GO:0008526;GO:0035091	phosphatidylinositol binding;phosphatidylinositol transporter activity;phosphatidylinositol transporter activity;phosphatidylinositol transporter activity;phosphatidylinositol binding	GO:0005737;GO:0005737;GO:0016020;GO:0005829;GO:0005654;GO:0005886;GO:0005886;GO:0005829;GO:0005829;GO:0005654	cytoplasm;cytoplasm;membrane;cytosol;nucleoplasm;plasma membrane;plasma membrane;cytosol;cytosol;nucleoplasm
MCF2L2	3.90142	1.964	5.61852e-16	5.39166e-14	MCF2L2	GO:0035023;GO:0065009;GO:0035023;GO:0065009;GO:0035023;GO:0065009;GO:0035023;GO:0065009	regulation of Rho protein signal transduction;regulation of molecular function;regulation of Rho protein signal transduction;regulation of molecular function;regulation of Rho protein signal transduction;regulation of molecular function;regulation of Rho protein signal transduction;regulation of molecular function	GO:0005089;GO:0005085;GO:0005089;GO:0005085;GO:0005089;GO:0005085;GO:0005089;GO:0005085	Rho guanyl-nucleotide exchange factor activity;guanyl-nucleotide exchange factor activity;Rho guanyl-nucleotide exchange factor activity;guanyl-nucleotide exchange factor activity;Rho guanyl-nucleotide exchange factor activity;guanyl-nucleotide exchange factor activity;Rho guanyl-nucleotide exchange factor activity;guanyl-nucleotide exchange factor activity	NA	NA
SPOCK1	0.266462	-1.908	6.13731e-16	5.84521e-14	SPOCK1	GO:0007165;GO:0007155;GO:0007399;GO:0001558;GO:0022008;GO:0010977;GO:0001764;GO:0010951;GO:0010812;GO:0021953;GO:0007165	signal transduction;cell adhesion;nervous system development;regulation of cell growth;neurogenesis;negative regulation of neuron projection development;neuron migration;negative regulation of endopeptidase activity;negative regulation of cell-substrate adhesion;central nervous system neuron differentiation;signal transduction	GO:0005515;GO:0005509;GO:0005509;GO:0004869;GO:0004867;GO:0008191;GO:0005515;GO:0005515;GO:0005509	protein binding;calcium ion binding;calcium ion binding;cysteine-type endopeptidase inhibitor activity;serine-type endopeptidase inhibitor activity;metalloendopeptidase inhibitor activity;protein binding;protein binding;calcium ion binding	GO:0005578;GO:0005737;GO:0005576;GO:0005615;GO:0014069;GO:0031594;GO:0016528;GO:0033268;GO:0005578	proteinaceous extracellular matrix;cytoplasm;extracellular region;extracellular space;postsynaptic density;neuromuscular junction;sarcoplasm;node of Ranvier;proteinaceous extracellular matrix
RIPOR3	2.36199	1.24	6.31918e-16	5.97351e-14	RIPOR3	NA	NA	NA	NA	NA	NA
TOX2	2.46058	1.299	6.4583e-16	6.0598e-14	TOX2	GO:0006366;GO:0006351;GO:0006355;GO:0045944;GO:0006366;GO:0006351;GO:0006355;GO:0045944;GO:0006366;GO:0006351;GO:0006355;GO:0045944;GO:0006366;GO:0006351;GO:0006355;GO:0045944	transcription from RNA polymerase II promoter;transcription, DNA-templated;regulation of transcription, DNA-templated;positive regulation of transcription from RNA polymerase II promoter;transcription from RNA polymerase II promoter;transcription, DNA-templated;regulation of transcription, DNA-templated;positive regulation of transcription from RNA polymerase II promoter;transcription from RNA po…	GO:0003677;GO:0000978;GO:0000981;GO:0001077;GO:0003677;GO:0000978;GO:0000981;GO:0001077;GO:0003677;GO:0000978;GO:0000981;GO:0001077;GO:0003677;GO:0000978;GO:0000981;GO:0001077	DNA binding;RNA polymerase II proximal promoter sequence-specific DNA binding;RNA polymerase II transcription factor activity, sequence-specific DNA binding;transcriptional activator activity, RNA polymerase II proximal promoter sequence-specific DNA binding;DNA binding;RNA polymerase II proximal promoter sequence-specific DNA binding;RNA polymerase II transcription factor activity, sequence-spec…	GO:0005634;GO:0005654;GO:0005634;GO:0005654;GO:0005634;GO:0005654;GO:0005634;GO:0005654	nucleus;nucleoplasm;nucleus;nucleoplasm;nucleus;nucleoplasm;nucleus;nucleoplasm
DSTN	2.4863	1.314	6.51368e-16	6.06682e-14	DSTN	GO:0030042;GO:0051014;GO:0030836;GO:0008154;GO:0030042;GO:0051014;GO:0030043;GO:0030042;GO:0051014;GO:0030836;GO:0008154;GO:0030042;GO:0051014;GO:0051014;GO:0030042;GO:0030836	actin filament depolymerization;actin filament severing;positive regulation of actin filament depolymerization;actin polymerization or depolymerization;actin filament depolymerization;actin filament severing;actin filament fragmentation;actin filament depolymerization;actin filament severing;positive regulation of actin filament depolymerization;actin polymerization or depolymerization;actin fila…	GO:0003779;GO:0005515;GO:0051015;GO:0051015;GO:0003779;GO:0005515;GO:0051015;GO:0003779	actin binding;protein binding;actin filament binding;actin filament binding;actin binding;protein binding;actin filament binding;actin binding	GO:0005622;GO:0015629;GO:0070062;GO:0015629;GO:0005737;GO:0030864;GO:0005622;GO:0015629;GO:0070062;GO:0015629;GO:0005622;GO:0015629	intracellular;actin cytoskeleton;extracellular exosome;actin cytoskeleton;cytoplasm;cortical actin cytoskeleton;intracellular;actin cytoskeleton;extracellular exosome;actin cytoskeleton;intracellular;actin cytoskeleton
L1CAM	0.419866	-1.252	7.4776e-16	6.91378e-14	L1CAM	GO:0007155;GO:0007275;GO:0030154;GO:0050900;GO:0007399;GO:0045773;GO:0016477;GO:0007399;GO:0007155;GO:0007411;GO:0050808;GO:0007411;GO:0031175;GO:0007160;GO:0061564;GO:0006935;GO:0007155;GO:0007275;GO:0030154;GO:0050900;GO:0007399;GO:0045773;GO:0016477;GO:0007399;GO:0007155;GO:0007411;GO:0050808;GO:0007411;GO:0031175;GO:0007160;GO:0061564;GO:0006935;GO:0007155;GO:0007275;GO:0030154;GO:0050900;GO:…	cell adhesion;multicellular organism development;cell differentiation;leukocyte migration;nervous system development;positive regulation of axon extension;cell migration;nervous system development;cell adhesion;axon guidance;synapse organization;axon guidance;neuron projection development;cell-matrix adhesion;axon development;chemotaxis;cell adhesion;multicellular organism development;cell differ…	GO:0005515;GO:0019904;GO:0005515;GO:0005515;GO:0019904;GO:0005515;GO:0005515;GO:0019904;GO:0005515;GO:0005515;GO:0005515;GO:0019904;GO:0005515	protein binding;protein domain specific binding;protein binding;protein binding;protein domain specific binding;protein binding;protein binding;protein domain specific binding;protein binding;protein binding;protein binding;protein domain specific binding;protein binding	GO:0016020;GO:0016021;GO:0005886;GO:0005886;GO:0042995;GO:0005925;GO:0030425;GO:0005886;GO:0030424;GO:0030424;GO:0030426;GO:0044295;GO:0031012;GO:0009986;GO:0009986;GO:0043025;GO:0016020;GO:0016021;GO:0005886;GO:0005886;GO:0042995;GO:0005925;GO:0030425;GO:0005886;GO:0030424;GO:0030424;GO:0030426;GO:0044295;GO:0031012;GO:0009986;GO:0009986;GO:0043025;GO:0016020;GO:0016021;GO:0005886;GO:0005886;GO:…	membrane;integral component of membrane;plasma membrane;plasma membrane;cell projection;focal adhesion;dendrite;plasma membrane;axon;axon;growth cone;axonal growth cone;extracellular matrix;cell surface;cell surface;neuronal cell body;membrane;integral component of membrane;plasma membrane;plasma membrane;cell projection;focal adhesion;dendrite;plasma membrane;axon;axon;growth cone;axonal growth …
MMP7	8.67582	3.117	7.84348e-16	7.19952e-14	MMP7	GO:0006508;GO:0030574;GO:0022617;GO:0030574;GO:0006508;GO:0006508;GO:0007568;GO:0031667;GO:0044849;GO:0060135;GO:0071260	proteolysis;collagen catabolic process;extracellular matrix disassembly;collagen catabolic process;proteolysis;proteolysis;aging;response to nutrient levels;estrous cycle;maternal process involved in female pregnancy;cellular response to mechanical stimulus	GO:0008270;GO:0004222;GO:0008237;GO:0046872;GO:0016787;GO:0005515;GO:0008233;GO:0004252;GO:0004222;GO:0008201;GO:0008237	zinc ion binding;metalloendopeptidase activity;metallopeptidase activity;metal ion binding;hydrolase activity;protein binding;peptidase activity;serine-type endopeptidase activity;metalloendopeptidase activity;heparin binding;metallopeptidase activity	GO:0031012;GO:0005576;GO:0005578;GO:0005576;GO:0070062;GO:0005615;GO:0005615;GO:0009986	extracellular matrix;extracellular region;proteinaceous extracellular matrix;extracellular region;extracellular exosome;extracellular space;extracellular space;cell surface
CTGF	3.38229	1.758	8.29389e-16	7.55818e-14	CTGF	GO:0001558;GO:0007155;GO:0010469;GO:0070374;GO:0007155;GO:0007267;GO:0071897;GO:0009611;GO:0006367;GO:0046330;GO:0060548;GO:0051496;GO:0008544;GO:0019216;GO:0045597;GO:0001502;GO:0001503;GO:0001525;GO:0001894;GO:0001934;GO:0007160;GO:0007229;GO:0007568;GO:0008284;GO:0008543;GO:0009749;GO:0010628;GO:0010629;GO:0010942;GO:0014070;GO:0016477;GO:0030154;GO:0030324;GO:0032330;GO:0032355;GO:0032967;GO:…	regulation of cell growth;cell adhesion;regulation of receptor activity;positive regulation of ERK1 and ERK2 cascade;cell adhesion;cell-cell signaling;DNA biosynthetic process;response to wounding;transcription initiation from RNA polymerase II promoter;positive regulation of JNK cascade;negative regulation of cell death;positive regulation of stress fiber assembly;epidermis development;regulatio…	GO:0005515;GO:0005520;GO:0005515;GO:0008201;GO:0008022;GO:0005178;GO:0008201;GO:0005520;GO:0001968;GO:0005178;GO:0008083	protein binding;insulin-like growth factor binding;protein binding;heparin binding;protein C-terminus binding;integrin binding;heparin binding;insulin-like growth factor binding;fibronectin binding;integrin binding;growth factor activity	GO:0005576;GO:0005578;GO:0005576;GO:0005578;GO:0005886;GO:0005578;GO:0005615;GO:0005801;GO:0005829;GO:0005938;GO:0048471	extracellular region;proteinaceous extracellular matrix;extracellular region;proteinaceous extracellular matrix;plasma membrane;proteinaceous extracellular matrix;extracellular space;cis-Golgi network;cytosol;cell cortex;perinuclear region of cytoplasm
UGDH	0.396667	-1.334	8.76518e-16	7.93061e-14	UGDH	GO:0055114;GO:0008152;GO:0022900;GO:0001702;GO:0006011;GO:0006024;GO:0006065;GO:0006065;GO:0055114;GO:0008152;GO:0022900;GO:0006011;GO:0006024;GO:0006065;GO:0006065;GO:0055114;GO:0008152;GO:0022900;GO:0006011;GO:0006024;GO:0006065;GO:0006065;GO:0055114;GO:0008152;GO:0022900;GO:0006011;GO:0006024;GO:0006065;GO:0006065;GO:0055114;GO:0055114;GO:0055114;GO:0055114;GO:0055114;GO:0055114;GO:0055114	oxidation-reduction process;metabolic process;electron transport chain;gastrulation with mouth forming second;UDP-glucose metabolic process;glycosaminoglycan biosynthetic process;UDP-glucuronate biosynthetic process;UDP-glucuronate biosynthetic process;oxidation-reduction process;metabolic process;electron transport chain;UDP-glucose metabolic process;glycosaminoglycan biosynthetic process;UDP-gl…	GO:0051287;GO:0016616;GO:0003979;GO:0016491;GO:0003824;GO:0009055;GO:0003979;GO:0051287;GO:0016616;GO:0003979;GO:0016491;GO:0003824;GO:0009055;GO:0003979;GO:0051287;GO:0016616;GO:0003979;GO:0016491;GO:0003824;GO:0009055;GO:0003979;GO:0051287;GO:0016616;GO:0003979;GO:0016491;GO:0003824;GO:0009055;GO:0003979;GO:0051287;GO:0016616;GO:0051287;GO:0016616;GO:0016616;GO:0051287;GO:0016616;GO:0051287;GO:…	NAD binding;oxidoreductase activity, acting on the CH-OH group of donors, NAD or NADP as acceptor;UDP-glucose 6-dehydrogenase activity;oxidoreductase activity;catalytic activity;electron transfer activity;UDP-glucose 6-dehydrogenase activity;NAD binding;oxidoreductase activity, acting on the CH-OH group of donors, NAD or NADP as acceptor;UDP-glucose 6-dehydrogenase activity;oxidoreductase activit…	GO:0005654;GO:0005634;GO:0005829;GO:0070062;GO:0005829;GO:0005654;GO:0005634;GO:0005829;GO:0070062;GO:0005829;GO:0005654;GO:0005634;GO:0005829;GO:0070062;GO:0005829;GO:0005654;GO:0005634;GO:0005829;GO:0070062;GO:0005829	nucleoplasm;nucleus;cytosol;extracellular exosome;cytosol;nucleoplasm;nucleus;cytosol;extracellular exosome;cytosol;nucleoplasm;nucleus;cytosol;extracellular exosome;cytosol;nucleoplasm;nucleus;cytosol;extracellular exosome;cytosol
LINC01605	0.116629	-3.1	1.03781e-15	9.32338e-14	LINC01605	NA	NA	NA	NA	NA	NA
ARRDC2	2.47426	1.307	1.14878e-15	1.02476e-13	ARRDC2	GO:0007165;GO:0007165;GO:0007165	signal transduction;signal transduction;signal transduction	NA	NA	GO:0005886;GO:0031410;GO:0005886;GO:0031410	plasma membrane;cytoplasmic vesicle;plasma membrane;cytoplasmic vesicle
DDIT4	3.96412	1.987	1.20119e-15	1.06402e-13	DDIT4	GO:0009968;GO:0001666;GO:0032007;GO:0042771;GO:0045820;GO:0071549;GO:0072593;GO:0006915;GO:0051607;GO:0051607;GO:0008283;GO:0001666;GO:0032007;GO:0007420;GO:0030182;GO:0042771;GO:0001764;GO:0048011;GO:1902532;GO:0033137;GO:0010801;GO:1901216	negative regulation of signal transduction;response to hypoxia;negative regulation of TOR signaling;intrinsic apoptotic signaling pathway in response to DNA damage by p53 class mediator;negative regulation of glycolytic process;cellular response to dexamethasone stimulus;reactive oxygen species metabolic process;apoptotic process;defense response to virus;defense response to virus;cell proliferat…	GO:0071889	14-3-3 protein binding	GO:0005737;GO:0005737;GO:0005829;GO:0005739;GO:0005829;GO:0005829;GO:0005622	cytoplasm;cytoplasm;cytosol;mitochondrion;cytosol;cytosol;intracellular
GFRA1	0.212863	-2.232	1.22256e-15	1.07543e-13	GFRA1	GO:0065009;GO:0000165;GO:0007411;GO:0035860;GO:0007166;GO:0065009;GO:0000165;GO:0007411;GO:0035860;GO:0007166;GO:0007399;GO:0065009;GO:0000165;GO:0007411;GO:0035860;GO:0007166;GO:0065009;GO:0000165;GO:0007411;GO:0035860;GO:0007166	regulation of molecular function;MAPK cascade;axon guidance;glial cell-derived neurotrophic factor receptor signaling pathway;cell surface receptor signaling pathway;regulation of molecular function;MAPK cascade;axon guidance;glial cell-derived neurotrophic factor receptor signaling pathway;cell surface receptor signaling pathway;nervous system development;regulation of molecular function;MAPK ca…	GO:0004872;GO:0005102;GO:0005088;GO:0016167;GO:0004872;GO:0005102;GO:0005088;GO:0016167;GO:0004872;GO:0005102;GO:0005088;GO:0016167;GO:0004872;GO:0005102;GO:0005088;GO:0016167	receptor activity;receptor binding;Ras guanyl-nucleotide exchange factor activity;glial cell-derived neurotrophic factor receptor activity;receptor activity;receptor binding;Ras guanyl-nucleotide exchange factor activity;glial cell-derived neurotrophic factor receptor activity;receptor activity;receptor binding;Ras guanyl-nucleotide exchange factor activity;glial cell-derived neurotrophic factor …	GO:0016020;GO:0005622;GO:0005886;GO:0005886;GO:0031225;GO:0070062;GO:0019898;GO:0016020;GO:0005622;GO:0005886;GO:0005886;GO:0031225;GO:0070062;GO:0019898;GO:0016020;GO:0005622;GO:0005886;GO:0005886;GO:0031225;GO:0070062;GO:0019898;GO:0016020;GO:0005622;GO:0005886;GO:0005886;GO:0031225;GO:0070062;GO:0019898	membrane;intracellular;plasma membrane;plasma membrane;anchored component of membrane;extracellular exosome;extrinsic component of membrane;membrane;intracellular;plasma membrane;plasma membrane;anchored component of membrane;extracellular exosome;extrinsic component of membrane;membrane;intracellular;plasma membrane;plasma membrane;anchored component of membrane;extracellular exosome;extrinsic c…
ELMO1	5.88891	2.558	1.28955e-15	1.12654e-13	ELMO1	GO:0006909;GO:0030036;GO:0016477;GO:0065009;GO:0006915;GO:0006915;GO:0038096;GO:0048010;GO:0030036;GO:0050690;GO:0048870;GO:0006911;GO:0016601;GO:0006909;GO:0030036;GO:0016477;GO:0065009;GO:0006915;GO:0006915;GO:0038096;GO:0030029;GO:0048010;GO:0030036;GO:0050690;GO:0048870;GO:0006911;GO:0016601;GO:0006909;GO:0030036;GO:0016477;GO:0065009;GO:0006915;GO:0006915;GO:0038096;GO:0048010;GO:0030036;GO:…	phagocytosis;actin cytoskeleton organization;cell migration;regulation of molecular function;apoptotic process;apoptotic process;Fc-gamma receptor signaling pathway involved in phagocytosis;vascular endothelial growth factor receptor signaling pathway;actin cytoskeleton organization;regulation of defense response to virus by virus;cell motility;phagocytosis, engulfment;Rac protein signal transduc…	GO:0005515;GO:0017124;GO:0017124;GO:0005085;GO:0005488;GO:0005515;GO:0017124;GO:0017124;GO:0005085;GO:0005515;GO:0017124;GO:0017124;GO:0005085;GO:0005488;GO:0005515;GO:0017124;GO:0017124;GO:0005085;GO:0005488;GO:0005515;GO:0017124;GO:0017124;GO:0005085	protein binding;SH3 domain binding;SH3 domain binding;guanyl-nucleotide exchange factor activity;binding;protein binding;SH3 domain binding;SH3 domain binding;guanyl-nucleotide exchange factor activity;protein binding;SH3 domain binding;SH3 domain binding;guanyl-nucleotide exchange factor activity;binding;protein binding;SH3 domain binding;SH3 domain binding;guanyl-nucleotide exchange factor acti…	GO:0005737;GO:0005737;GO:0016020;GO:0016020;GO:0005886;GO:0005886;GO:0005829;GO:0032045;GO:0005737;GO:0005737;GO:0016020;GO:0016020;GO:0005886;GO:0005886;GO:0005829;GO:0032045;GO:0032045;GO:0005737;GO:0005737;GO:0016020;GO:0016020;GO:0005886;GO:0005886;GO:0005829;GO:0032045;GO:0005737;GO:0005737;GO:0016020;GO:0016020;GO:0005886;GO:0005886;GO:0005829;GO:0032045;GO:0005737;GO:0005737;GO:0016020;GO:…	cytoplasm;cytoplasm;membrane;membrane;plasma membrane;plasma membrane;cytosol;guanyl-nucleotide exchange factor complex;cytoplasm;cytoplasm;membrane;membrane;plasma membrane;plasma membrane;cytosol;guanyl-nucleotide exchange factor complex;guanyl-nucleotide exchange factor complex;cytoplasm;cytoplasm;membrane;membrane;plasma membrane;plasma membrane;cytosol;guanyl-nucleotide exchange factor compl…
TGFB1I1	2.00973	1.007	1.40845e-15	1.22198e-13	TGFB1I1	GO:0016055;GO:0030154;GO:0045893;GO:0045893;GO:0010718;GO:0030512;GO:0030511;GO:0007155;GO:0006366;GO:0030521;GO:0008285;GO:0009408;GO:0016331;GO:0030579;GO:0030855;GO:0045165;GO:0045599;GO:0016055;GO:0030154;GO:0045893;GO:0045893;GO:0010718;GO:0030512;GO:0030511;GO:0007155;GO:0006366;GO:0030521;GO:0008285;GO:0030579;GO:0016055;GO:0030154;GO:0045893;GO:0045893;GO:0010718;GO:0030512;GO:0030511;GO:…	Wnt signaling pathway;cell differentiation;positive regulation of transcription, DNA-templated;positive regulation of transcription, DNA-templated;positive regulation of epithelial to mesenchymal transition;negative regulation of transforming growth factor beta receptor signaling pathway;positive regulation of transforming growth factor beta receptor signaling pathway;cell adhesion;transcription …	GO:0046872;GO:0005515;GO:0003713;GO:0003713;GO:0070411;GO:0048495;GO:0050681;GO:0050681;GO:0070411;GO:0046872;GO:0005515;GO:0003713;GO:0003713;GO:0070411;GO:0048495;GO:0050681;GO:0050681;GO:0046872;GO:0005515;GO:0003713;GO:0003713;GO:0070411;GO:0048495;GO:0050681;GO:0050681;GO:0046872;GO:0005515;GO:0003713;GO:0003713;GO:0070411;GO:0048495;GO:0050681;GO:0050681	metal ion binding;protein binding;transcription coactivator activity;transcription coactivator activity;I-SMAD binding;Roundabout binding;androgen receptor binding;androgen receptor binding;I-SMAD binding;metal ion binding;protein binding;transcription coactivator activity;transcription coactivator activity;I-SMAD binding;Roundabout binding;androgen receptor binding;androgen receptor binding;meta…	GO:0005634;GO:0005737;GO:0005856;GO:0030054;GO:0005925;GO:0005925;GO:0005622;GO:0031012;GO:0016363;GO:0005634;GO:0005737;GO:0005856;GO:0030054;GO:0005925;GO:0005925;GO:0005622;GO:0031012;GO:0016363;GO:0005634;GO:0005737;GO:0005856;GO:0030054;GO:0005925;GO:0005925;GO:0005622;GO:0031012;GO:0016363;GO:0005634;GO:0005737;GO:0005856;GO:0030054;GO:0005925;GO:0005925;GO:0005622;GO:0031012;GO:0016363	nucleus;cytoplasm;cytoskeleton;cell junction;focal adhesion;focal adhesion;intracellular;extracellular matrix;nuclear matrix;nucleus;cytoplasm;cytoskeleton;cell junction;focal adhesion;focal adhesion;intracellular;extracellular matrix;nuclear matrix;nucleus;cytoplasm;cytoskeleton;cell junction;focal adhesion;focal adhesion;intracellular;extracellular matrix;nuclear matrix;nucleus;cytoplasm;cytosk…
CDH4	5.90117	2.561	1.81874e-15	1.56721e-13	CDH4	GO:0007156;GO:0007155;GO:0007155;GO:0034332;GO:0007157;GO:0007411;GO:0045773;GO:0007156;GO:0007155;GO:0007156;GO:0007155;GO:0007155;GO:0034332	homophilic cell adhesion via plasma membrane adhesion molecules;cell adhesion;cell adhesion;adherens junction organization;heterophilic cell-cell adhesion via plasma membrane cell adhesion molecules;axon guidance;positive regulation of axon extension;homophilic cell adhesion via plasma membrane adhesion molecules;cell adhesion;homophilic cell adhesion via plasma membrane adhesion molecules;cell a…	GO:0005509;GO:0046872;GO:0005509;GO:0005509;GO:0046872	calcium ion binding;metal ion binding;calcium ion binding;calcium ion binding;metal ion binding	GO:0005886;GO:0016020;GO:0016021;GO:0005886;GO:0005886;GO:0005887;GO:0005886;GO:0016020;GO:0016021;GO:0005886;GO:0005886;GO:0016020;GO:0016021;GO:0005886;GO:0005886	plasma membrane;membrane;integral component of membrane;plasma membrane;plasma membrane;integral component of plasma membrane;plasma membrane;membrane;integral component of membrane;plasma membrane;plasma membrane;membrane;integral component of membrane;plasma membrane;plasma membrane
MMP10	0.124827	-3.002	1.90627e-15	1.63153e-13	MMP10	GO:0006508;GO:0030574;GO:0022617;GO:0030574;GO:0006508;GO:0030334;GO:0006508	proteolysis;collagen catabolic process;extracellular matrix disassembly;collagen catabolic process;proteolysis;regulation of cell migration;proteolysis	GO:0008270;GO:0004222;GO:0008237;GO:0046872;GO:0016787;GO:0008233;GO:0004252;GO:0004222;GO:0008270;GO:0008270;GO:0004222;GO:0008237;GO:0046872;GO:0016787;GO:0008233	zinc ion binding;metalloendopeptidase activity;metallopeptidase activity;metal ion binding;hydrolase activity;peptidase activity;serine-type endopeptidase activity;metalloendopeptidase activity;zinc ion binding;zinc ion binding;metalloendopeptidase activity;metallopeptidase activity;metal ion binding;hydrolase activity;peptidase activity	GO:0031012;GO:0005576;GO:0005578;GO:0005576;GO:0005615;GO:0005578;GO:0031012	extracellular matrix;extracellular region;proteinaceous extracellular matrix;extracellular region;extracellular space;proteinaceous extracellular matrix;extracellular matrix
GPAT3	0.385019	-1.377	1.98026e-15	1.68349e-13	GPAT3	GO:0008152;GO:0006629;GO:0008654;GO:0016024;GO:0006654;GO:0032006;GO:0019432;GO:0019432;GO:0008152;GO:0006629;GO:0008654;GO:0016024;GO:0006654;GO:0032006;GO:0019432;GO:0019432;GO:0008152;GO:0006629;GO:0008654;GO:0019432;GO:0016024;GO:0006654;GO:0032006;GO:0019432	metabolic process;lipid metabolic process;phospholipid biosynthetic process;CDP-diacylglycerol biosynthetic process;phosphatidic acid biosynthetic process;regulation of TOR signaling;triglyceride biosynthetic process;triglyceride biosynthetic process;metabolic process;lipid metabolic process;phospholipid biosynthetic process;CDP-diacylglycerol biosynthetic process;phosphatidic acid biosynthetic p…	GO:0016746;GO:0016740;GO:0003841;GO:0003841;GO:0004366;GO:0004366;GO:0102420;GO:0016746;GO:0016740;GO:0003841;GO:0003841;GO:0004366;GO:0004366;GO:0102420;GO:0016746;GO:0016740;GO:0003841;GO:0004366;GO:0003841;GO:0004366;GO:0102420	transferase activity, transferring acyl groups;transferase activity;1-acylglycerol-3-phosphate O-acyltransferase activity;1-acylglycerol-3-phosphate O-acyltransferase activity;glycerol-3-phosphate O-acyltransferase activity;glycerol-3-phosphate O-acyltransferase activity;sn-1-glycerol-3-phosphate C16:0-DCA-CoA acyl transferase activity;transferase activity, transferring acyl groups;transferase ac…	GO:0016020;GO:0016021;GO:0005783;GO:0005783;GO:0005789;GO:0005789;GO:0005789;GO:0016020;GO:0016021;GO:0005783;GO:0005783;GO:0005789;GO:0005789;GO:0005789;GO:0016020;GO:0016021;GO:0005783;GO:0005783;GO:0005789;GO:0005789;GO:0005789	membrane;integral component of membrane;endoplasmic reticulum;endoplasmic reticulum;endoplasmic reticulum membrane;endoplasmic reticulum membrane;endoplasmic reticulum membrane;membrane;integral component of membrane;endoplasmic reticulum;endoplasmic reticulum;endoplasmic reticulum membrane;endoplasmic reticulum membrane;endoplasmic reticulum membrane;membrane;integral component of membrane;endop…
IRS2	5.64119	2.496	2.26809e-15	1.91532e-13	IRS2	GO:0007165;GO:0036092;GO:0046854;GO:0008284;GO:0046326;GO:0009749;GO:0055088;GO:0000165;GO:0008286;GO:0007165;GO:0032024;GO:0007411;GO:0051897;GO:0048015;GO:0038111;GO:0032869;GO:0008286;GO:0045725;GO:0045725;GO:0030890;GO:0010748;GO:0006006;GO:0010907;GO:0032000;GO:0019216;GO:0002053;GO:0002903;GO:0002903;GO:0007420;GO:0008283;GO:0008284;GO:0008286;GO:0009749;GO:0030335;GO:0030879;GO:0030890;GO:…	signal transduction;phosphatidylinositol-3-phosphate biosynthetic process;phosphatidylinositol phosphorylation;positive regulation of cell proliferation;positive regulation of glucose import;response to glucose;lipid homeostasis;MAPK cascade;insulin receptor signaling pathway;signal transduction;positive regulation of insulin secretion;axon guidance;positive regulation of protein kinase B signali…	GO:0005515;GO:0004871;GO:0004871;GO:0004871;GO:0046934;GO:0005088;GO:0016303;GO:0005158;GO:0043548;GO:0005158;GO:0019901;GO:0019903;GO:0019904;GO:0043548;GO:0071889	protein binding;signal transducer activity;signal transducer activity;signal transducer activity;phosphatidylinositol-4,5-bisphosphate 3-kinase activity;Ras guanyl-nucleotide exchange factor activity;1-phosphatidylinositol-3-kinase activity;insulin receptor binding;phosphatidylinositol 3-kinase binding;insulin receptor binding;protein kinase binding;protein phosphatase binding;protein domain spec…	GO:0005737;GO:0005829;GO:0005886;GO:0005886;GO:0005829;GO:0005829;GO:0005886	cytoplasm;cytosol;plasma membrane;plasma membrane;cytosol;cytosol;plasma membrane
CRISPLD2	2.30058	1.202	3.41324e-15	2.86328e-13	CRISPLD2	GO:0030198;GO:0030324;GO:0043312;GO:0060325;GO:0043312;GO:0060325;GO:0043312;GO:0060325	extracellular matrix organization;lung development;neutrophil degranulation;face morphogenesis;neutrophil degranulation;face morphogenesis;neutrophil degranulation;face morphogenesis	GO:0005539;GO:0008201	glycosaminoglycan binding;heparin binding	GO:0005576;GO:0005576;GO:0005578;GO:0070062;GO:0034774;GO:1904813;GO:0030133;GO:0005576;GO:0005576;GO:0005576;GO:0070062;GO:0034774;GO:1904813;GO:0030133;GO:0005576;GO:0005576;GO:0070062;GO:0034774;GO:1904813;GO:0030133;GO:0005576;GO:0005576	extracellular region;extracellular region;proteinaceous extracellular matrix;extracellular exosome;secretory granule lumen;ficolin-1-rich granule lumen;transport vesicle;extracellular region;extracellular region;extracellular region;extracellular exosome;secretory granule lumen;ficolin-1-rich granule lumen;transport vesicle;extracellular region;extracellular region;extracellular exosome;secretory…
ITGB5	2.24856	1.169	3.93766e-15	3.28147e-13	ITGB5	GO:0007229;GO:0007155;GO:0007229;GO:0046718;GO:0002479;GO:0016032;GO:0030198;GO:0007179;GO:0007160;GO:0006936;GO:0035987;GO:0043149;GO:0090136;GO:0007229;GO:0007155;GO:0007229;GO:0007155;GO:0007229;GO:0007155;GO:0007229;GO:0007155;GO:0007229;GO:0007155;GO:0007229	integrin-mediated signaling pathway;cell adhesion;integrin-mediated signaling pathway;viral entry into host cell;antigen processing and presentation of exogenous peptide antigen via MHC class I, TAP-dependent;viral process;extracellular matrix organization;transforming growth factor beta receptor signaling pathway;cell-matrix adhesion;muscle contraction;endodermal cell differentiation;stress fibe…	GO:0004872;GO:0005515;GO:0001618;GO:0004872;GO:0004872;GO:0004872;GO:0004872;GO:0004872;GO:0004872	receptor activity;protein binding;virus receptor activity;receptor activity;receptor activity;receptor activity;receptor activity;receptor activity;receptor activity	GO:0008305;GO:0016020;GO:0016021;GO:0005925;GO:0005886;GO:0070062;GO:0009986;GO:0009986;GO:0043235;GO:0034684;GO:0045335;GO:0008305;GO:0016020;GO:0016021;GO:0008305;GO:0016020;GO:0016021;GO:0008305;GO:0016020;GO:0016021;GO:0008305;GO:0016020;GO:0016021;GO:0008305;GO:0016020;GO:0016021;GO:0008305	integrin complex;membrane;integral component of membrane;focal adhesion;plasma membrane;extracellular exosome;cell surface;cell surface;receptor complex;integrin alphav-beta5 complex;phagocytic vesicle;integrin complex;membrane;integral component of membrane;integrin complex;membrane;integral component of membrane;integrin complex;membrane;integral component of membrane;integrin complex;membrane;…
REPS2	3.37526	1.755	4.22789e-15	3.5003e-13	REPS2	GO:0061024;GO:0065003;GO:0007173;GO:0061024;GO:0065003;GO:0007173	membrane organization;macromolecular complex assembly;epidermal growth factor receptor signaling pathway;membrane organization;macromolecular complex assembly;epidermal growth factor receptor signaling pathway	GO:0005515;GO:0005509;GO:0046872;GO:0005515;GO:0005509;GO:0005515;GO:0005509;GO:0046872;GO:0005515;GO:0005509	protein binding;calcium ion binding;metal ion binding;protein binding;calcium ion binding;protein binding;calcium ion binding;metal ion binding;protein binding;calcium ion binding	GO:0005737;GO:0005829;GO:0005737;GO:0005829	cytoplasm;cytosol;cytoplasm;cytosol
ADRA1B	3.7633	1.912	4.52838e-15	3.72474e-13	ADRA1B	GO:0007186;GO:0019229;GO:0006937;GO:0055117;GO:0071875;GO:0007186;GO:0019229;GO:0006937;GO:0055117;GO:0007165;GO:0007186;GO:0007267;GO:0007275;GO:0008283;GO:0035556;GO:0043410;GO:0007188;GO:0007200;GO:0007204;GO:0071880;GO:0045987;GO:0045907;GO:0001994;GO:0042593	G-protein coupled receptor signaling pathway;regulation of vasoconstriction;regulation of muscle contraction;regulation of cardiac muscle contraction;adrenergic receptor signaling pathway;G-protein coupled receptor signaling pathway;regulation of vasoconstriction;regulation of muscle contraction;regulation of cardiac muscle contraction;signal transduction;G-protein coupled receptor signaling path…	GO:0004937;GO:0004930;GO:0004937;GO:0004935;GO:0005515;GO:0004871;GO:0046982;GO:0004937;GO:0004937	alpha1-adrenergic receptor activity;G-protein coupled receptor activity;alpha1-adrenergic receptor activity;adrenergic receptor activity;protein binding;signal transducer activity;protein heterodimerization activity;alpha1-adrenergic receptor activity;alpha1-adrenergic receptor activity	GO:0016021;GO:0016021;GO:0005634;GO:0005634;GO:0005737;GO:0005737;GO:0016020;GO:0005886;GO:0005886;GO:0005901;GO:0005886;GO:0005887;GO:0031965;GO:0031965	integral component of membrane;integral component of membrane;nucleus;nucleus;cytoplasm;cytoplasm;membrane;plasma membrane;plasma membrane;caveola;plasma membrane;integral component of plasma membrane;nuclear membrane;nuclear membrane
CALB2	0.268129	-1.899	4.9046e-15	4.00817e-13	CALB2	GO:0051480;GO:0051480	regulation of cytosolic calcium ion concentration;regulation of cytosolic calcium ion concentration	GO:0005509;GO:0046872;GO:0005509;GO:0005509;GO:0005509;GO:0005509	calcium ion binding;metal ion binding;calcium ion binding;calcium ion binding;calcium ion binding;calcium ion binding	GO:0005829;GO:0005634;GO:0005634;GO:0005737;GO:0005921;GO:0043195;GO:0005829;GO:0045202;GO:0043005;GO:0005829;GO:0005829	cytosol;nucleus;nucleus;cytoplasm;gap junction;terminal bouton;cytosol;synapse;neuron projection;cytosol;cytosol
KYNU	0.428391	-1.223	6.61725e-15	5.3389e-13	KYNU	GO:0009435;GO:0006569;GO:0009435;GO:0019363;GO:0034341;GO:0006569;GO:0006569;GO:0019805;GO:0019441;GO:0019441;GO:0019442;GO:0034516;GO:0043420;GO:0097053;GO:0009435;GO:0006569;GO:0009435;GO:0019363;GO:0034341;GO:0006569;GO:0006569;GO:0019805;GO:0019441;GO:0034516;GO:0043420;GO:0097053;GO:0009435;GO:0006569;GO:0009435;GO:0019363;GO:0034341;GO:0006569;GO:0006569;GO:0019805;GO:0019441;GO:0034516;GO:…	NAD biosynthetic process;tryptophan catabolic process;NAD biosynthetic process;pyridine nucleotide biosynthetic process;response to interferon-gamma;tryptophan catabolic process;tryptophan catabolic process;quinolinate biosynthetic process;tryptophan catabolic process to kynurenine;tryptophan catabolic process to kynurenine;tryptophan catabolic process to acetyl-CoA;response to vitamin B6;anthran…	GO:0003824;GO:0030170;GO:0030429;GO:0016787;GO:0042803;GO:0030429;GO:0030429;GO:0030429;GO:0003824;GO:0030170;GO:0030429;GO:0016787;GO:0042803;GO:0030429;GO:0030429;GO:0030429;GO:0003824;GO:0030170;GO:0030429;GO:0016787;GO:0042803;GO:0030429;GO:0030429;GO:0030429;GO:0003824;GO:0030170;GO:0030429;GO:0003824;GO:0003824;GO:0030170;GO:0030429;GO:0003824;GO:0030170;GO:0030429;GO:0003824;GO:0030170;GO:…	catalytic activity;pyridoxal phosphate binding;kynureninase activity;hydrolase activity;protein homodimerization activity;kynureninase activity;kynureninase activity;kynureninase activity;catalytic activity;pyridoxal phosphate binding;kynureninase activity;hydrolase activity;protein homodimerization activity;kynureninase activity;kynureninase activity;kynureninase activity;catalytic activity;pyri…	GO:0005737;GO:0005829;GO:0005654;GO:0005739;GO:0005829;GO:0005829;GO:0005737;GO:0005829;GO:0005654;GO:0005739;GO:0005829;GO:0005737;GO:0005829;GO:0005654;GO:0005739;GO:0005829;GO:0005737;GO:0005737;GO:0005737;GO:0005737	cytoplasm;cytosol;nucleoplasm;mitochondrion;cytosol;cytosol;cytoplasm;cytosol;nucleoplasm;mitochondrion;cytosol;cytoplasm;cytosol;nucleoplasm;mitochondrion;cytosol;cytoplasm;cytoplasm;cytoplasm;cytoplasm
CLEC1A	10.8528	3.44	6.98541e-15	5.60027e-13	CLEC1A	GO:0007166;GO:0006952	cell surface receptor signaling pathway;defense response	GO:0030246;GO:0004888;GO:0030246;GO:0030246	carbohydrate binding;transmembrane signaling receptor activity;carbohydrate binding;carbohydrate binding	GO:0016020;GO:0016021;GO:0005887;GO:0005622;GO:0016020;GO:0016021;GO:0016020;GO:0016021;GO:0016020;GO:0016021	membrane;integral component of membrane;integral component of plasma membrane;intracellular;membrane;integral component of membrane;membrane;integral component of membrane;membrane;integral component of membrane
NHS	0.340093	-1.556	8.46283e-15	6.74206e-13	NHS	GO:0030154;GO:0002088;GO:0002088;GO:0030154;GO:0030154;GO:0002088	cell differentiation;lens development in camera-type eye;lens development in camera-type eye;cell differentiation;cell differentiation;lens development in camera-type eye	NA	NA	GO:0005737;GO:0016020;GO:0005794;GO:0005886;GO:0030054;GO:0042995;GO:0016604;GO:0030054;GO:0005925;GO:0005923;GO:0030027;GO:0016324;GO:0005737;GO:0016020;GO:0005794;GO:0005886;GO:0030054;GO:0042995;GO:0016604;GO:0030054;GO:0005925;GO:0005923;GO:0030027;GO:0016324;GO:0005794;GO:0030054;GO:0016604;GO:0005794;GO:0030054;GO:0016604	cytoplasm;membrane;Golgi apparatus;plasma membrane;cell junction;cell projection;nuclear body;cell junction;focal adhesion;bicellular tight junction;lamellipodium;apical plasma membrane;cytoplasm;membrane;Golgi apparatus;plasma membrane;cell junction;cell projection;nuclear body;cell junction;focal adhesion;bicellular tight junction;lamellipodium;apical plasma membrane;Golgi apparatus;cell juncti…
IRX3	2.5245	1.336	9.33893e-15	7.39351e-13	IRX3	GO:0006355;GO:0006351;GO:0007275;GO:0006357;GO:0001656;GO:0007498;GO:0045665;GO:0045666;GO:0072047;GO:0072086	regulation of transcription, DNA-templated;transcription, DNA-templated;multicellular organism development;regulation of transcription from RNA polymerase II promoter;metanephros development;mesoderm development;negative regulation of neuron differentiation;positive regulation of neuron differentiation;proximal/distal pattern formation involved in nephron development;specification of loop of Henl…	GO:0003677;GO:0043565;GO:0000981;GO:0000981	DNA binding;sequence-specific DNA binding;RNA polymerase II transcription factor activity, sequence-specific DNA binding;RNA polymerase II transcription factor activity, sequence-specific DNA binding	GO:0005634;GO:0005737;GO:0030424	nucleus;cytoplasm;axon
ITGA5	1.9917	0.994	9.46296e-15	7.44517e-13	ITGA5	GO:0007229;GO:0007155;GO:0007229;GO:0050900;GO:0030949;GO:1903672;GO:0046718;GO:0016032;GO:0050731;GO:0007155;GO:0030198;GO:0001525;GO:0031589;GO:0035987;GO:0033627;GO:0034113;GO:2000811;GO:0007044;GO:0007157;GO:0007159;GO:0007613;GO:0010811;GO:0030335;GO:0033631;GO:0035313;GO:0045765	integrin-mediated signaling pathway;cell adhesion;integrin-mediated signaling pathway;leukocyte migration;positive regulation of vascular endothelial growth factor receptor signaling pathway;positive regulation of sprouting angiogenesis;viral entry into host cell;viral process;positive regulation of peptidyl-tyrosine phosphorylation;cell adhesion;extracellular matrix organization;angiogenesis;cel…	GO:0046872;GO:0005515;GO:0001618;GO:0043184;GO:0005161;GO:0005154;GO:0005178;GO:0050839	metal ion binding;protein binding;virus receptor activity;vascular endothelial growth factor receptor 2 binding;platelet-derived growth factor receptor binding;epidermal growth factor receptor binding;integrin binding;cell adhesion molecule binding	GO:0008305;GO:0016020;GO:0016021;GO:0030054;GO:0005925;GO:0005925;GO:0005925;GO:0005886;GO:0009986;GO:0009986;GO:0009986;GO:0001726;GO:0005911;GO:0008305;GO:0032587;GO:0071062;GO:0005737;GO:0005783;GO:0005794;GO:0005886;GO:0009897;GO:0031410;GO:0045202;GO:0016020;GO:0016021	integrin complex;membrane;integral component of membrane;cell junction;focal adhesion;focal adhesion;focal adhesion;plasma membrane;cell surface;cell surface;cell surface;ruffle;cell-cell junction;integrin complex;ruffle membrane;alphav-beta3 integrin-vitronectin complex;cytoplasm;endoplasmic reticulum;Golgi apparatus;plasma membrane;external side of plasma membrane;cytoplasmic vesicle;synapse;me…
MT1F	5.71598	2.515	1.05547e-14	8.25288e-13	MT1F	GO:0045926;GO:0071294;GO:0071276	negative regulation of growth;cellular response to zinc ion;cellular response to cadmium ion	GO:0046872;GO:0008270;GO:0005515;GO:0046872	metal ion binding;zinc ion binding;protein binding;metal ion binding	GO:0005634;GO:0005737;GO:0048471	nucleus;cytoplasm;perinuclear region of cytoplasm
EPHA4	0.30187	-1.728	1.13331e-14	8.80712e-13	EPHA4	GO:0006468;GO:0007169;GO:0016310;GO:0018108;GO:0048013;GO:0006468;GO:0007169;GO:0016310;GO:0007155;GO:0018108;GO:0048013;GO:0007275;GO:0007399;GO:1904646;GO:0048013;GO:0046777;GO:0043087;GO:0050770;GO:0061001;GO:0048681;GO:0008045;GO:1902004;GO:1902961;GO:0018108;GO:1900272;GO:1905244;GO:0010977;GO:0061098;GO:0048013;GO:0050821;GO:1903051;GO:0097155;GO:0097156;GO:0021957;GO:0048710;GO:0097485;GO:…	protein phosphorylation;transmembrane receptor protein tyrosine kinase signaling pathway;phosphorylation;peptidyl-tyrosine phosphorylation;ephrin receptor signaling pathway;protein phosphorylation;transmembrane receptor protein tyrosine kinase signaling pathway;phosphorylation;cell adhesion;peptidyl-tyrosine phosphorylation;ephrin receptor signaling pathway;multicellular organism development;nerv…	GO:0005524;GO:0005515;GO:0004672;GO:0005003;GO:0004713;GO:0000166;GO:0016740;GO:0016301;GO:0005524;GO:0005515;GO:0004672;GO:0005003;GO:0004713;GO:0000166;GO:0016740;GO:0016301;GO:0005515;GO:0004714;GO:0004672;GO:0016301;GO:0005005;GO:0005004;GO:1990782;GO:0042731;GO:0097161;GO:0004672;GO:0005524;GO:0005515;GO:0005515;GO:0005515;GO:0005515;GO:0005515;GO:0005524;GO:0005515;GO:0004672;GO:0005003;GO:…	ATP binding;protein binding;protein kinase activity;ephrin receptor activity;protein tyrosine kinase activity;nucleotide binding;transferase activity;kinase activity;ATP binding;protein binding;protein kinase activity;ephrin receptor activity;protein tyrosine kinase activity;nucleotide binding;transferase activity;kinase activity;protein binding;transmembrane receptor protein tyrosine kinase acti…	GO:0016021;GO:0005887;GO:0016020;GO:0016021;GO:0005887;GO:0005737;GO:0016020;GO:0005886;GO:0042995;GO:0030054;GO:0045202;GO:0045211;GO:0030425;GO:0030425;GO:0005886;GO:0005887;GO:0005768;GO:0030424;GO:0030424;GO:0031901;GO:0005769;GO:0014069;GO:0005886;GO:0043197;GO:0043198;GO:0016021;GO:0005887;GO:0005737;GO:0016020;GO:0005886;GO:0042995;GO:0030054;GO:0045202;GO:0045211;GO:0005737;GO:0005741;GO:…	integral component of membrane;integral component of plasma membrane;membrane;integral component of membrane;integral component of plasma membrane;cytoplasm;membrane;plasma membrane;cell projection;cell junction;synapse;postsynaptic membrane;dendrite;dendrite;plasma membrane;integral component of plasma membrane;endosome;axon;axon;early endosome membrane;early endosome;postsynaptic density;plasma…
CCND3	1.95206	0.965	1.24672e-14	9.62941e-13	CCND3	GO:0007049;GO:0051301;GO:0001934;GO:0045737;GO:0000122;GO:0007165;GO:0042098;GO:0042127;GO:0046626;GO:0051726;GO:0007049;GO:0051301;GO:0001934;GO:0045737;GO:0007049;GO:0007049;GO:0051301;GO:0001934;GO:0045737;GO:0007049;GO:0051301;GO:0001934;GO:0045737;GO:0007049;GO:0051301;GO:0001934;GO:0045737;GO:0007049;GO:0007049;GO:0007049;GO:0007049;GO:0007049;GO:0007049;GO:0051301;GO:0001934;GO:0045737	cell cycle;cell division;positive regulation of protein phosphorylation;positive regulation of cyclin-dependent protein serine/threonine kinase activity;negative regulation of transcription from RNA polymerase II promoter;signal transduction;T cell proliferation;regulation of cell proliferation;regulation of insulin receptor signaling pathway;regulation of cell cycle;cell cycle;cell division;posi…	GO:0005515;GO:0019901;GO:0004693;GO:0019901;GO:0005515;GO:0019901;GO:0005515;GO:0019901;GO:0005515;GO:0019901;GO:0005515;GO:0019901;GO:0005515;GO:0019901	protein binding;protein kinase binding;cyclin-dependent protein serine/threonine kinase activity;protein kinase binding;protein binding;protein kinase binding;protein binding;protein kinase binding;protein binding;protein kinase binding;protein binding;protein kinase binding;protein binding;protein kinase binding	GO:0005634;GO:0005737;GO:0016020;GO:0005654;GO:0000307;GO:0005634;GO:0005737;GO:0016020;GO:0005654;GO:0000307;GO:0005634;GO:0005634;GO:0005737;GO:0016020;GO:0005654;GO:0000307;GO:0005634;GO:0005737;GO:0016020;GO:0005654;GO:0000307;GO:0005634;GO:0005737;GO:0016020;GO:0005654;GO:0000307;GO:0005634;GO:0005634;GO:0005737;GO:0016020;GO:0005654;GO:0000307	nucleus;cytoplasm;membrane;nucleoplasm;cyclin-dependent protein kinase holoenzyme complex;nucleus;cytoplasm;membrane;nucleoplasm;cyclin-dependent protein kinase holoenzyme complex;nucleus;nucleus;cytoplasm;membrane;nucleoplasm;cyclin-dependent protein kinase holoenzyme complex;nucleus;cytoplasm;membrane;nucleoplasm;cyclin-dependent protein kinase holoenzyme complex;nucleus;cytoplasm;membrane;nucl…
GABRA2	0.382094	-1.388	1.43458e-14	1.10132e-12	GABRA2	GO:0006811;GO:0006821;GO:0007214;GO:0034220;GO:0007214;GO:0006836;GO:1902476;GO:0001505;GO:0006811;GO:0006821;GO:0007214;GO:0034220;GO:0007214;GO:0006836;GO:1902476;GO:0001505;GO:0006811;GO:0006821;GO:0007214;GO:0034220;GO:0007214;GO:0006836;GO:1902476;GO:0001505;GO:0006811;GO:0006821;GO:0007214;GO:0034220;GO:0007214;GO:0006836;GO:1902476;GO:0001505;GO:0006821;GO:0007214;GO:0034220;GO:0006811;GO:…	ion transport;chloride transport;gamma-aminobutyric acid signaling pathway;ion transmembrane transport;gamma-aminobutyric acid signaling pathway;neurotransmitter transport;chloride transmembrane transport;regulation of neurotransmitter levels;ion transport;chloride transport;gamma-aminobutyric acid signaling pathway;ion transmembrane transport;gamma-aminobutyric acid signaling pathway;neurotransm…	GO:0005216;GO:0004890;GO:0004888;GO:0005230;GO:0005254;GO:0004890;GO:0022851;GO:0008503;GO:0005216;GO:0004890;GO:0004888;GO:0005230;GO:0005254;GO:0004890;GO:0022851;GO:0008503;GO:0005216;GO:0004890;GO:0004888;GO:0005230;GO:0005254;GO:0004890;GO:0022851;GO:0008503;GO:0005216;GO:0004890;GO:0004888;GO:0005230;GO:0005254;GO:0004890;GO:0022851;GO:0008503;GO:0005216;GO:0004888;GO:0004890;GO:0005216;GO:…	ion channel activity;GABA-A receptor activity;transmembrane signaling receptor activity;extracellular ligand-gated ion channel activity;chloride channel activity;GABA-A receptor activity;GABA-gated chloride ion channel activity;benzodiazepine receptor activity;ion channel activity;GABA-A receptor activity;transmembrane signaling receptor activity;extracellular ligand-gated ion channel activity;ch…	GO:0016021;GO:0016020;GO:0005886;GO:0030054;GO:0045202;GO:0045211;GO:0030659;GO:0031410;GO:0034707;GO:0005886;GO:1902711;GO:0030285;GO:0016021;GO:0016020;GO:0005886;GO:0030054;GO:0045202;GO:0045211;GO:0030659;GO:0031410;GO:0034707;GO:0005886;GO:1902711;GO:0030285;GO:0016021;GO:0016020;GO:0005886;GO:0030054;GO:0045202;GO:0045211;GO:0030659;GO:0031410;GO:0034707;GO:0005886;GO:1902711;GO:0030285;GO:…	integral component of membrane;membrane;plasma membrane;cell junction;synapse;postsynaptic membrane;cytoplasmic vesicle membrane;cytoplasmic vesicle;chloride channel complex;plasma membrane;GABA-A receptor complex;integral component of synaptic vesicle membrane;integral component of membrane;membrane;plasma membrane;cell junction;synapse;postsynaptic membrane;cytoplasmic vesicle membrane;cytoplas…
FRMD3	3.12965	1.646	1.52668e-14	1.16497e-12	FRMD3	GO:0031032;GO:0031032;GO:0031032;GO:0031032;GO:0031032	actomyosin structure organization;actomyosin structure organization;actomyosin structure organization;actomyosin structure organization;actomyosin structure organization	GO:0008092;GO:0005200;GO:0008092;GO:0005200;GO:0008092;GO:0005200;GO:0008092;GO:0005200;GO:0008092;GO:0005200	cytoskeletal protein binding;structural constituent of cytoskeleton;cytoskeletal protein binding;structural constituent of cytoskeleton;cytoskeletal protein binding;structural constituent of cytoskeleton;cytoskeletal protein binding;structural constituent of cytoskeleton;cytoskeletal protein binding;structural constituent of cytoskeleton	GO:0016020;GO:0016021;GO:0005856;GO:0005856;GO:0005856;GO:0016020;GO:0016021;GO:0005856;GO:0005856;GO:0016020;GO:0016021;GO:0005856;GO:0005856;GO:0016020;GO:0016021;GO:0005856;GO:0005856;GO:0005856;GO:0016020;GO:0016021;GO:0005856	membrane;integral component of membrane;cytoskeleton;cytoskeleton;cytoskeleton;membrane;integral component of membrane;cytoskeleton;cytoskeleton;membrane;integral component of membrane;cytoskeleton;cytoskeleton;membrane;integral component of membrane;cytoskeleton;cytoskeleton;cytoskeleton;membrane;integral component of membrane;cytoskeleton
ANXA4	3.04618	1.607	1.81005e-14	1.36475e-12	ANXA4	GO:0050819;GO:0007165;GO:0043086;GO:0043066;GO:0030855;GO:0006357;GO:0032088;GO:2000483;GO:0007219	negative regulation of coagulation;signal transduction;negative regulation of catalytic activity;negative regulation of apoptotic process;epithelial cell differentiation;regulation of transcription from RNA polymerase II promoter;negative regulation of NF-kappaB transcription factor activity;negative regulation of interleukin-8 secretion;Notch signaling pathway	GO:0005509;GO:0005544;GO:0005509;GO:0005544;GO:0005515;GO:0005544;GO:0005544;GO:0042802;GO:0005509;GO:0048306;GO:0004859;GO:0051059;GO:0005509;GO:0005544	calcium ion binding;calcium-dependent phospholipid binding;calcium ion binding;calcium-dependent phospholipid binding;protein binding;calcium-dependent phospholipid binding;calcium-dependent phospholipid binding;identical protein binding;calcium ion binding;calcium-dependent protein binding;phospholipase inhibitor activity;NF-kappaB binding;calcium ion binding;calcium-dependent phospholipid bindi…	GO:0005737;GO:0048471;GO:0005737;GO:0005634;GO:0070062;GO:0009986;GO:0005886;GO:0012506;GO:0031965	cytoplasm;perinuclear region of cytoplasm;cytoplasm;nucleus;extracellular exosome;cell surface;plasma membrane;vesicle membrane;nuclear membrane
TGFBR2	2.2642	1.179	1.8868e-14	1.41421e-12	TGFBR2	GO:0006468;GO:0007178;GO:0007179;GO:0016310;GO:0006915;GO:0006915;GO:0023014;GO:0030154;GO:0007179;GO:0007179;GO:0007179;GO:0010718;GO:0060412;GO:0003151;GO:0040008;GO:0001947;GO:0060021;GO:0007507;GO:0001569;GO:0003148;GO:0030512;GO:0060389;GO:0032147;GO:0018105;GO:0018107;GO:0008284;GO:0002053;GO:0007179;GO:0006468;GO:0042127;GO:2000379;GO:0001570;GO:0070723;GO:0007420;GO:0003149;GO:0042493;GO:…	protein phosphorylation;transmembrane receptor protein serine/threonine kinase signaling pathway;transforming growth factor beta receptor signaling pathway;phosphorylation;apoptotic process;apoptotic process;signal transduction by protein phosphorylation;cell differentiation;transforming growth factor beta receptor signaling pathway;transforming growth factor beta receptor signaling pathway;trans…	GO:0046872;GO:0005524;GO:0004702;GO:0004872;GO:0004674;GO:0004672;GO:0005026;GO:0000166;GO:0016740;GO:0016301;GO:0005515;GO:0034713;GO:0046332;GO:0050431;GO:0050431;GO:0005539;GO:0005024;GO:0005024;GO:0005024;GO:0004675;GO:0046872;GO:0005524;GO:0004702;GO:0004872;GO:0004674;GO:0004672;GO:0005026;GO:0000166;GO:0016740;GO:0016301;GO:0005515;GO:0005024;GO:0031435;GO:0046332;GO:0050431;GO:0034713;GO:…	metal ion binding;ATP binding;signal transducer, downstream of receptor, with serine/threonine kinase activity;receptor activity;protein serine/threonine kinase activity;protein kinase activity;transforming growth factor beta receptor activity, type II;nucleotide binding;transferase activity;kinase activity;protein binding;type I transforming growth factor beta receptor binding;SMAD binding;trans…	GO:0016021;GO:0016020;GO:0043235;GO:0005886;GO:0005886;GO:0045121;GO:0045121;GO:0005886;GO:0005829;GO:0009897;GO:0043235;GO:0005901;GO:0016021;GO:0070022;GO:0016021;GO:0016020;GO:0043235;GO:0005886;GO:0005886;GO:0045121;GO:0045121;GO:0005886;GO:0005829;GO:0005737;GO:0005829;GO:0005887;GO:0005901;GO:0009897;GO:0009986;GO:0009897;GO:0043235;GO:0005901;GO:0016021;GO:0070022	integral component of membrane;membrane;receptor complex;plasma membrane;plasma membrane;membrane raft;membrane raft;plasma membrane;cytosol;external side of plasma membrane;receptor complex;caveola;integral component of membrane;transforming growth factor beta receptor complex;integral component of membrane;membrane;receptor complex;plasma membrane;plasma membrane;membrane raft;membrane raft;pla…
NKX2-2	3.91497	1.969	2.08107e-14	1.55064e-12	NKX2-2	GO:0006355;GO:0006351;GO:0007275;GO:0007420;GO:0051091;GO:0031018;GO:0003323;GO:0003326;GO:0003327;GO:0003329;GO:0007224;GO:0007399;GO:0009749;GO:0010628;GO:0014003;GO:0014070;GO:0021522;GO:0021529;GO:0021530;GO:0021554;GO:0030154;GO:0031018;GO:0032570;GO:0045595;GO:0045597;GO:0045665;GO:0045666;GO:0045944;GO:0048468;GO:0048565;GO:0048665;GO:0048708;GO:0048714;GO:0051091;GO:0060580	regulation of transcription, DNA-templated;transcription, DNA-templated;multicellular organism development;brain development;positive regulation of DNA binding transcription factor activity;endocrine pancreas development;type B pancreatic cell development;pancreatic A cell fate commitment;type B pancreatic cell fate commitment;pancreatic PP cell fate commitment;smoothened signaling pathway;nervou…	GO:0003677;GO:0043565;GO:0003713;GO:0000981;GO:0003682;GO:0000987;GO:0000987;GO:0003682;GO:0003700;GO:0003713;GO:0008134	DNA binding;sequence-specific DNA binding;transcription coactivator activity;RNA polymerase II transcription factor activity, sequence-specific DNA binding;chromatin binding;proximal promoter sequence-specific DNA binding;proximal promoter sequence-specific DNA binding;chromatin binding;DNA binding transcription factor activity;transcription coactivator activity;transcription factor binding	GO:0005634;GO:0005654;GO:0005622	nucleus;nucleoplasm;intracellular
NPC2	2.40827	1.268	2.29957e-14	1.70343e-12	NPC2	GO:0032367;GO:0032367;GO:0006629;GO:0008202;GO:0008203;GO:0009615;GO:0043312;GO:0030301;GO:0033344;GO:0034383;GO:0042632;GO:0015914;GO:0019747;GO:0032366;GO:0032367;GO:0032367;GO:0046836;GO:0032367;GO:0006629;GO:0008202;GO:0030301;GO:0033344;GO:0008203;GO:0009615;GO:0043312;GO:0030301;GO:0033344;GO:0034383;GO:0042632;GO:0015914;GO:0019747;GO:0032366;GO:0032367;GO:0032367;GO:0046836;GO:0032367;GO:…	intracellular cholesterol transport;intracellular cholesterol transport;lipid metabolic process;steroid metabolic process;cholesterol metabolic process;response to virus;neutrophil degranulation;cholesterol transport;cholesterol efflux;low-density lipoprotein particle clearance;cholesterol homeostasis;phospholipid transport;regulation of isoprenoid metabolic process;intracellular sterol transport…	GO:0005515;GO:0019899;GO:0015485;GO:0017127;GO:0005515;GO:0015485;GO:0019899;GO:0015485;GO:0017127	protein binding;enzyme binding;cholesterol binding;cholesterol transporter activity;protein binding;cholesterol binding;enzyme binding;cholesterol binding;cholesterol transporter activity	GO:0005622;GO:0005783;GO:0005576;GO:0005764;GO:0005576;GO:0070062;GO:0043202;GO:0035578;GO:0005764;GO:0005622;GO:0005783;GO:0005576;GO:0005615;GO:0005764;GO:0005576;GO:0070062;GO:0043202;GO:0035578;GO:0005764;GO:0005622;GO:0005622;GO:0005622;GO:0005622;GO:0005622	intracellular;endoplasmic reticulum;extracellular region;lysosome;extracellular region;extracellular exosome;lysosomal lumen;azurophil granule lumen;lysosome;intracellular;endoplasmic reticulum;extracellular region;extracellular space;lysosome;extracellular region;extracellular exosome;lysosomal lumen;azurophil granule lumen;lysosome;intracellular;intracellular;intracellular;intracellular;intrace…
FYB1	0.138889	-2.848	2.59315e-14	1.90974e-12	FYB1	GO:0006955;GO:0008150;GO:0050852;GO:0006468;GO:0006955;GO:0007165;GO:0006607;GO:0035556;GO:0006955;GO:0006955;GO:0008150;GO:0050852;GO:0006468;GO:0006955;GO:0007165;GO:0006607;GO:0035556;GO:0072659;GO:0006955;GO:0008150;GO:0050852;GO:0006468;GO:0006955;GO:0007165;GO:0006607;GO:0035556;GO:0006955;GO:0008150;GO:0050852;GO:0006468;GO:0006955;GO:0007165;GO:0006607;GO:0035556;GO:0006955;GO:0006955;GO:…	immune response;biological_process;T cell receptor signaling pathway;protein phosphorylation;immune response;signal transduction;NLS-bearing protein import into nucleus;intracellular signal transduction;immune response;immune response;biological_process;T cell receptor signaling pathway;protein phosphorylation;immune response;signal transduction;NLS-bearing protein import into nucleus;intracellul…	GO:0005515;GO:0008289;GO:0005515;GO:0005102;GO:0005515;GO:0008289;GO:0005515;GO:0008289;GO:0005515;GO:0005102;GO:0005515;GO:0008289;GO:0005515;GO:0005102;GO:0005515;GO:0008289;GO:0005515;GO:0005102	protein binding;lipid binding;protein binding;receptor binding;protein binding;lipid binding;protein binding;lipid binding;protein binding;receptor binding;protein binding;lipid binding;protein binding;receptor binding;protein binding;lipid binding;protein binding;receptor binding	GO:0015629;GO:0005634;GO:0005737;GO:0030054;GO:0005886;GO:0005829;GO:0005634;GO:0015629;GO:0015629;GO:0015629;GO:0005634;GO:0005737;GO:0030054;GO:0005886;GO:0005829;GO:0005634;GO:0015629;GO:0005886;GO:0015629;GO:0005634;GO:0005737;GO:0030054;GO:0005886;GO:0005829;GO:0005634;GO:0015629;GO:0015629;GO:0005634;GO:0005737;GO:0030054;GO:0005886;GO:0005829;GO:0005634;GO:0015629;GO:0015629;GO:0015629;GO:…	actin cytoskeleton;nucleus;cytoplasm;cell junction;plasma membrane;cytosol;nucleus;actin cytoskeleton;actin cytoskeleton;actin cytoskeleton;nucleus;cytoplasm;cell junction;plasma membrane;cytosol;nucleus;actin cytoskeleton;plasma membrane;actin cytoskeleton;nucleus;cytoplasm;cell junction;plasma membrane;cytosol;nucleus;actin cytoskeleton;actin cytoskeleton;nucleus;cytoplasm;cell junction;plasma …
NIPAL3	0.380245	-1.395	4.47332e-14	3.27535e-12	NIPAL3	GO:0015693;GO:1903830;GO:0015693;GO:0015693;GO:1903830;GO:0015693;GO:0015693;GO:1903830;GO:0015693;GO:0015693;GO:1903830;GO:0015693;GO:1903830	magnesium ion transport;magnesium ion transmembrane transport;magnesium ion transport;magnesium ion transport;magnesium ion transmembrane transport;magnesium ion transport;magnesium ion transport;magnesium ion transmembrane transport;magnesium ion transport;magnesium ion transport;magnesium ion transmembrane transport;magnesium ion transport;magnesium ion transmembrane transport	GO:0015095;GO:0005515;GO:0015095;GO:0005515;GO:0015095;GO:0005515;GO:0015095;GO:0015095	magnesium ion transmembrane transporter activity;protein binding;magnesium ion transmembrane transporter activity;protein binding;magnesium ion transmembrane transporter activity;protein binding;magnesium ion transmembrane transporter activity;magnesium ion transmembrane transporter activity	GO:0016021;GO:0016020;GO:0016020;GO:0016021;GO:0016020;GO:0016020;GO:0016021;GO:0016020;GO:0016020;GO:0016021;GO:0016020;GO:0016021;GO:0016020	integral component of membrane;membrane;membrane;integral component of membrane;membrane;membrane;integral component of membrane;membrane;membrane;integral component of membrane;membrane;integral component of membrane;membrane
	4.63638	2.213	4.74692e-14	3.45571e-12	AC068580.4	GO:0006508;GO:0009607;GO:0009607;GO:0006508;GO:0009607;GO:0006508;GO:0006508;GO:0006914;GO:0030163	proteolysis;response to biotic stimulus;response to biotic stimulus;proteolysis;response to biotic stimulus;proteolysis;proteolysis;autophagy;protein catabolic process	GO:0004190;GO:0016787;GO:0008233;GO:0004190;GO:0016787;GO:0008233;GO:0004190;GO:0016787;GO:0008233;GO:0004190	aspartic-type endopeptidase activity;hydrolase activity;peptidase activity;aspartic-type endopeptidase activity;hydrolase activity;peptidase activity;aspartic-type endopeptidase activity;hydrolase activity;peptidase activity;aspartic-type endopeptidase activity	GO:0016021;GO:0016020;GO:0016021;GO:0016020;GO:0016021;GO:0016020	integral component of membrane;membrane;integral component of membrane;membrane;integral component of membrane;membrane
NANOS1	3.46295	1.792	5.37871e-14	3.89327e-12	NANOS1	GO:0016477;GO:0006417;GO:0017148;GO:1900153;GO:0010608;GO:0010631;GO:0001558;GO:0001894;GO:0010608;GO:0098749;GO:0006417	cell migration;regulation of translation;negative regulation of translation;positive regulation of nuclear-transcribed mRNA catabolic process, deadenylation-dependent decay;posttranscriptional regulation of gene expression;epithelial cell migration;regulation of cell growth;tissue homeostasis;posttranscriptional regulation of gene expression;cerebellar neuron development;regulation of translation	GO:0008270;GO:0003723;GO:0046872;GO:0005515;GO:0030371;GO:0008270;GO:0003723	zinc ion binding;RNA binding;metal ion binding;protein binding;translation repressor activity;zinc ion binding;RNA binding	GO:0005737;GO:0005737;GO:0048471;GO:0048471	cytoplasm;cytoplasm;perinuclear region of cytoplasm;perinuclear region of cytoplasm
CYP2S1	0.433769	-1.205	6.28053e-14	4.5202e-12	CYP2S1	GO:0055114;GO:0019373;GO:0055114;GO:0055114;GO:0055114	oxidation-reduction process;epoxygenase P450 pathway;oxidation-reduction process;oxidation-reduction process;oxidation-reduction process	GO:0005506;GO:0020037;GO:0016705;GO:0016712;GO:0046872;GO:0004497;GO:0016491;GO:0005515;GO:0008392;GO:0008395;GO:0070330;GO:0008401;GO:0005506;GO:0020037;GO:0016705;GO:0005506;GO:0016705;GO:0020037;GO:0005506;GO:0020037;GO:0016705	iron ion binding;heme binding;oxidoreductase activity, acting on paired donors, with incorporation or reduction of molecular oxygen;oxidoreductase activity, acting on paired donors, with incorporation or reduction of molecular oxygen, reduced flavin or flavoprotein as one donor, and incorporation of one atom of oxygen;metal ion binding;monooxygenase activity;oxidoreductase activity;protein bindin…	GO:0016020;GO:0005783;GO:0005783;GO:0005789;GO:0005789;GO:0043231;GO:0031090;GO:0016020;GO:0016021	membrane;endoplasmic reticulum;endoplasmic reticulum;endoplasmic reticulum membrane;endoplasmic reticulum membrane;intracellular membrane-bounded organelle;organelle membrane;membrane;integral component of membrane
CRABP2	0.212274	-2.236	7.21996e-14	5.16696e-12	CRABP2	GO:0048385;GO:0007165;GO:0006355;GO:0008544;GO:0048385;GO:0007165;GO:0006355;GO:0008544;GO:0048385;GO:0048385;GO:0007165;GO:0006355;GO:0008544;GO:0035115;GO:0042573;GO:0048672	regulation of retinoic acid receptor signaling pathway;signal transduction;regulation of transcription, DNA-templated;epidermis development;regulation of retinoic acid receptor signaling pathway;signal transduction;regulation of transcription, DNA-templated;epidermis development;regulation of retinoic acid receptor signaling pathway;regulation of retinoic acid receptor signaling pathway;signal tr…	GO:0008289;GO:0001972;GO:0005515;GO:0016918;GO:0019841;GO:0005501;GO:0008289;GO:0001972;GO:0005515;GO:0016918;GO:0019841;GO:0005501;GO:0008289;GO:0001972;GO:0008289;GO:0001972;GO:0005515;GO:0016918;GO:0019841;GO:0005501	lipid binding;retinoic acid binding;protein binding;retinal binding;retinol binding;retinoid binding;lipid binding;retinoic acid binding;protein binding;retinal binding;retinol binding;retinoid binding;lipid binding;retinoic acid binding;lipid binding;retinoic acid binding;protein binding;retinal binding;retinol binding;retinoid binding	GO:0005634;GO:0005737;GO:0005829;GO:0005654;GO:0005783;GO:0005654;GO:0005829;GO:0070062;GO:0005634;GO:0005737;GO:0005829;GO:0005654;GO:0005783;GO:0005654;GO:0005829;GO:0070062;GO:0005634;GO:0005737;GO:0005634;GO:0005737;GO:0005829;GO:0005654;GO:0005783;GO:0005654;GO:0005829;GO:0070062	nucleus;cytoplasm;cytosol;nucleoplasm;endoplasmic reticulum;nucleoplasm;cytosol;extracellular exosome;nucleus;cytoplasm;cytosol;nucleoplasm;endoplasmic reticulum;nucleoplasm;cytosol;extracellular exosome;nucleus;cytoplasm;nucleus;cytoplasm;cytosol;nucleoplasm;endoplasmic reticulum;nucleoplasm;cytosol;extracellular exosome
RIPK4	0.412653	-1.277	7.66736e-14	5.45631e-12	RIPK4	GO:0006468;GO:0016310;GO:0051092;GO:0002009;GO:0006468;GO:0016310;GO:0051092;GO:0002009	protein phosphorylation;phosphorylation;positive regulation of NF-kappaB transcription factor activity;morphogenesis of an epithelium;protein phosphorylation;phosphorylation;positive regulation of NF-kappaB transcription factor activity;morphogenesis of an epithelium	GO:0005524;GO:0005515;GO:0004672;GO:0000166;GO:0004674;GO:0016740;GO:0016301;GO:0005515;GO:0005524;GO:0005515;GO:0004672;GO:0000166;GO:0004674;GO:0016740;GO:0016301;GO:0005515	ATP binding;protein binding;protein kinase activity;nucleotide binding;protein serine/threonine kinase activity;transferase activity;kinase activity;protein binding;ATP binding;protein binding;protein kinase activity;nucleotide binding;protein serine/threonine kinase activity;transferase activity;kinase activity;protein binding	GO:0005737;GO:0005737;GO:0016020;GO:0005737;GO:0005737;GO:0016020	cytoplasm;cytoplasm;membrane;cytoplasm;cytoplasm;membrane
ID1	1.98206	0.987	9.69354e-14	6.85967e-12	ID1	GO:0045892;GO:0006351;GO:0006355;GO:0048511;GO:0007275;GO:0007179;GO:0001525;GO:0048514;GO:0045892;GO:0000122;GO:0001886;GO:0007420;GO:0007507;GO:0007623;GO:0010621;GO:0010628;GO:0010629;GO:0014070;GO:0030182;GO:0030509;GO:0031648;GO:0032091;GO:0032233;GO:0032963;GO:0036164;GO:0043066;GO:0043392;GO:0043408;GO:0043433;GO:0043534;GO:0045602;GO:0045668;GO:0045765;GO:0046677;GO:0050679;GO:0050774;GO:…	negative regulation of transcription, DNA-templated;transcription, DNA-templated;regulation of transcription, DNA-templated;rhythmic process;multicellular organism development;transforming growth factor beta receptor signaling pathway;angiogenesis;blood vessel morphogenesis;negative regulation of transcription, DNA-templated;negative regulation of transcription from RNA polymerase II promoter;end…	GO:0046983;GO:0005515;GO:0000981;GO:0000981;GO:0003700;GO:0008022;GO:0008134;GO:0042803;GO:0043621;GO:0047485;GO:0070628;GO:0046983;GO:0005515;GO:0000981;GO:0000981	protein dimerization activity;protein binding;RNA polymerase II transcription factor activity, sequence-specific DNA binding;RNA polymerase II transcription factor activity, sequence-specific DNA binding;DNA binding transcription factor activity;protein C-terminus binding;transcription factor binding;protein homodimerization activity;protein self-association;protein N-terminus binding;proteasome …	GO:0005634;GO:0005737;GO:0005794;GO:0005654;GO:0005654;GO:0005634;GO:0005813;GO:0005634;GO:0005737;GO:0005794;GO:0005654;GO:0005654;GO:0005634	nucleus;cytoplasm;Golgi apparatus;nucleoplasm;nucleoplasm;nucleus;centrosome;nucleus;cytoplasm;Golgi apparatus;nucleoplasm;nucleoplasm;nucleus
KLF9	2.2176	1.149	9.93862e-14	6.99403e-12	KLF9	GO:0006351;GO:0006355;GO:0007623;GO:0048511;GO:0006357;GO:0097067;GO:0010839;GO:0071387	transcription, DNA-templated;regulation of transcription, DNA-templated;circadian rhythm;rhythmic process;regulation of transcription from RNA polymerase II promoter;cellular response to thyroid hormone stimulus;negative regulation of keratinocyte proliferation;cellular response to cortisol stimulus	GO:0003676;GO:0046872;GO:0003677;GO:0000981;GO:0003700	nucleic acid binding;metal ion binding;DNA binding;RNA polymerase II transcription factor activity, sequence-specific DNA binding;DNA binding transcription factor activity	GO:0005634;GO:0005634;GO:0005829;GO:0005654;GO:0005886	nucleus;nucleus;cytosol;nucleoplasm;plasma membrane
SCUBE1	0.360732	-1.471	1.12164e-13	7.84963e-12	SCUBE1	GO:0006954;GO:0007165;GO:0030154;GO:0051260;GO:0007596;GO:0022617;GO:0045446;GO:0007512;GO:0009791;GO:0045880	inflammatory response;signal transduction;cell differentiation;protein homooligomerization;blood coagulation;extracellular matrix disassembly;endothelial cell differentiation;adult heart development;post-embryonic development;positive regulation of smoothened signaling pathway	GO:0005509;GO:0005509;GO:0046982;GO:0042802;GO:0005509;GO:0005509;GO:0005509	calcium ion binding;calcium ion binding;protein heterodimerization activity;identical protein binding;calcium ion binding;calcium ion binding;calcium ion binding	GO:0016020;GO:0005886;GO:0005576;GO:0005886;GO:0009986;GO:0005615;GO:0009897;GO:0019897	membrane;plasma membrane;extracellular region;plasma membrane;cell surface;extracellular space;external side of plasma membrane;extrinsic component of plasma membrane
B3GALT5-AS1	0.1971	-2.343	1.23182e-13	8.57332e-12	B3GALT5-AS1	NA	NA	NA	NA	NA	NA
PLEKHG4	0.176165	-2.505	1.25127e-13	8.66109e-12	PLEKHG4	GO:0035023;GO:0035023;GO:0090630;GO:0035023;GO:0035023;GO:0035023;GO:0035023	regulation of Rho protein signal transduction;regulation of Rho protein signal transduction;activation of GTPase activity;regulation of Rho protein signal transduction;regulation of Rho protein signal transduction;regulation of Rho protein signal transduction;regulation of Rho protein signal transduction	GO:0005089;GO:0005515;GO:0005085;GO:0005089;GO:0005515;GO:0005085;GO:0005089;GO:0005515;GO:0005085;GO:0005089;GO:0005515;GO:0005085;GO:0005089;GO:0005515;GO:0005085;GO:0005089;GO:0005515;GO:0005085	Rho guanyl-nucleotide exchange factor activity;protein binding;guanyl-nucleotide exchange factor activity;Rho guanyl-nucleotide exchange factor activity;protein binding;guanyl-nucleotide exchange factor activity;Rho guanyl-nucleotide exchange factor activity;protein binding;guanyl-nucleotide exchange factor activity;Rho guanyl-nucleotide exchange factor activity;protein binding;guanyl-nucleotide …	NA	NA
NEXN	2.15995	1.111	1.45643e-13	1.00264e-11	NEXN	GO:0030334;GO:0051493;GO:0048739;GO:0030334;GO:0051493;GO:0048739	regulation of cell migration;regulation of cytoskeleton organization;cardiac muscle fiber development;regulation of cell migration;regulation of cytoskeleton organization;cardiac muscle fiber development	GO:0003779;GO:0051015;GO:0008307;GO:0003779;GO:0051015;GO:0008307	actin binding;actin filament binding;structural constituent of muscle;actin binding;actin filament binding;structural constituent of muscle	GO:0005737;GO:0005856;GO:0030054;GO:0005925;GO:0030018;GO:0005912;GO:0030018;GO:0030018;GO:0005737;GO:0005856;GO:0030054;GO:0005925;GO:0030018;GO:0005912;GO:0030018;GO:0030018	cytoplasm;cytoskeleton;cell junction;focal adhesion;Z disc;adherens junction;Z disc;Z disc;cytoplasm;cytoskeleton;cell junction;focal adhesion;Z disc;adherens junction;Z disc;Z disc
RTN1	4.2693	2.094	1.8363e-13	1.25732e-11	RTN1	NA	NA	GO:0005515;GO:0005515	protein binding;protein binding	GO:0016020;GO:0016021;GO:0005783;GO:0005789;GO:0016020;GO:0016021;GO:0005783;GO:0005783;GO:0005789;GO:0030176;GO:0016020;GO:0016021;GO:0005783;GO:0005783;GO:0005789;GO:0030176;GO:0016020;GO:0016021;GO:0005783;GO:0005783;GO:0005789	membrane;integral component of membrane;endoplasmic reticulum;endoplasmic reticulum membrane;membrane;integral component of membrane;endoplasmic reticulum;endoplasmic reticulum;endoplasmic reticulum membrane;integral component of endoplasmic reticulum membrane;membrane;integral component of membrane;endoplasmic reticulum;endoplasmic reticulum;endoplasmic reticulum membrane;integral component of e…
IGSF10	0.153042	-2.708	1.95829e-13	1.33364e-11	IGSF10	GO:0007275;GO:0030154;GO:0001503;GO:2001222;GO:2001222	multicellular organism development;cell differentiation;ossification;regulation of neuron migration;regulation of neuron migration	GO:0005515	protein binding	GO:0005576;GO:0005576	extracellular region;extracellular region
CD44	0.418413	-1.257	2.20044e-13	1.49053e-11	CD44	GO:0007155;GO:0050900;GO:0070374;GO:0043312;GO:0033138;GO:0043066;GO:0050731;GO:0051216;GO:0030198;GO:0043154;GO:0060333;GO:0044319;GO:0022617;GO:0007160;GO:0044344;GO:0098609;GO:0043518;GO:1902166;GO:0030214;GO:0030214;GO:0034116;GO:0070487;GO:2000392;GO:1900625;GO:0007155;GO:0050900;GO:0070374;GO:0043312;GO:0033138;GO:0043066;GO:0050731;GO:0051216;GO:0030198;GO:0043154;GO:0060333;GO:0044319;GO:…	cell adhesion;leukocyte migration;positive regulation of ERK1 and ERK2 cascade;neutrophil degranulation;positive regulation of peptidyl-serine phosphorylation;negative regulation of apoptotic process;positive regulation of peptidyl-tyrosine phosphorylation;cartilage development;extracellular matrix organization;negative regulation of cysteine-type endopeptidase activity involved in apoptotic proc…	GO:0005540;GO:0005515;GO:0005540;GO:0005540;GO:0005518;GO:0004896;GO:0005540;GO:0005515;GO:0005540;GO:0005540;GO:0005518;GO:0004896;GO:0005540;GO:0005540;GO:0005515;GO:0005540;GO:0005540;GO:0005518;GO:0004896;GO:0005540;GO:0005540;GO:0005540;GO:0005515;GO:0005540;GO:0005540;GO:0005518;GO:0004896;GO:0005540;GO:0005540;GO:0005515;GO:0005540;GO:0005540;GO:0005518;GO:0004896;GO:0005540;GO:0005515;GO:…	hyaluronic acid binding;protein binding;hyaluronic acid binding;hyaluronic acid binding;collagen binding;cytokine receptor activity;hyaluronic acid binding;protein binding;hyaluronic acid binding;hyaluronic acid binding;collagen binding;cytokine receptor activity;hyaluronic acid binding;hyaluronic acid binding;protein binding;hyaluronic acid binding;hyaluronic acid binding;collagen binding;cytoki…	GO:0016021;GO:0016020;GO:0005794;GO:0005829;GO:0005886;GO:0005886;GO:0042995;GO:0042995;GO:0005925;GO:0005886;GO:0005887;GO:0070062;GO:0005902;GO:0005902;GO:0016324;GO:0009986;GO:0030667;GO:0035692;GO:0031258;GO:0016021;GO:0016020;GO:0005794;GO:0005829;GO:0005886;GO:0005886;GO:0042995;GO:0042995;GO:0005925;GO:0005886;GO:0005887;GO:0070062;GO:0005902;GO:0005902;GO:0016324;GO:0009986;GO:0030667;GO:…	integral component of membrane;membrane;Golgi apparatus;cytosol;plasma membrane;plasma membrane;cell projection;cell projection;focal adhesion;plasma membrane;integral component of plasma membrane;extracellular exosome;microvillus;microvillus;apical plasma membrane;cell surface;secretory granule membrane;macrophage migration inhibitory factor receptor complex;lamellipodium membrane;integral compo…
KCNE4	0.450625	-1.15	2.24602e-13	1.51331e-11	KCNE4	GO:0006811;GO:0006813;GO:0034765;GO:0071805	ion transport;potassium ion transport;regulation of ion transmembrane transport;potassium ion transmembrane transport	GO:0005249;GO:0005244;GO:0005267;GO:0005515;GO:0044325	voltage-gated potassium channel activity;voltage-gated ion channel activity;potassium channel activity;protein binding;ion channel binding	GO:0016020;GO:0016021;GO:0016324	membrane;integral component of membrane;apical plasma membrane
ENOX1	3.01258	1.591	3.03095e-13	2.02069e-11	ENOX1	GO:0055114;GO:0048511	oxidation-reduction process;rhythmic process	GO:0003676;GO:0003723;GO:0016491;GO:0005515	nucleic acid binding;RNA binding;oxidoreductase activity;protein binding	GO:0016020;GO:0005886;GO:0005886;GO:0005576;GO:0005615	membrane;plasma membrane;plasma membrane;extracellular region;extracellular space
MMP1	0.222211	-2.17	3.02688e-13	2.02069e-11	MMP1	GO:0006508;GO:0050900;GO:0044267;GO:0006508;GO:0032461;GO:0030574;GO:0016032;GO:0019221;GO:0022617;GO:0030574;GO:0006508	proteolysis;leukocyte migration;cellular protein metabolic process;proteolysis;positive regulation of protein oligomerization;collagen catabolic process;viral process;cytokine-mediated signaling pathway;extracellular matrix disassembly;collagen catabolic process;proteolysis	GO:0008270;GO:0004222;GO:0008237;GO:0046872;GO:0016787;GO:0008233;GO:0004252;GO:0004222;GO:0008270;GO:0004175;GO:0004222	zinc ion binding;metalloendopeptidase activity;metallopeptidase activity;metal ion binding;hydrolase activity;peptidase activity;serine-type endopeptidase activity;metalloendopeptidase activity;zinc ion binding;endopeptidase activity;metalloendopeptidase activity	GO:0031012;GO:0005576;GO:0005578;GO:0005576	extracellular matrix;extracellular region;proteinaceous extracellular matrix;extracellular region
ADM	1.92652	0.946	3.71874e-13	2.46625e-11	ADM	GO:0010469;GO:0007186;GO:0007165;GO:0007267;GO:0009611;GO:0007189;GO:0030816;GO:0031623;GO:0097647;GO:0001570;GO:1990410;GO:0008015;GO:0007565;GO:0002031;GO:0006171;GO:0003073;GO:0006701;GO:0010460;GO:0035809;GO:0045906;GO:0010469;GO:0010469;GO:0010469;GO:0010469;GO:0007186;GO:0007165;GO:0007267;GO:0009611;GO:0007189;GO:0030816;GO:0031623;GO:0097647;GO:0001570;GO:1990410;GO:0008015;GO:0007565;GO:…	regulation of receptor activity;G-protein coupled receptor signaling pathway;signal transduction;cell-cell signaling;response to wounding;adenylate cyclase-activating G-protein coupled receptor signaling pathway;positive regulation of cAMP metabolic process;receptor internalization;amylin receptor signaling pathway;vasculogenesis;adrenomedullin receptor signaling pathway;blood circulation;female …	GO:0005179;GO:0005102;GO:0031700;GO:0005179;GO:0005179;GO:0005179;GO:0005179;GO:0005102;GO:0031700;GO:0031700;GO:0005179;GO:0005179;GO:0005102;GO:0031700;GO:0005179	hormone activity;receptor binding;adrenomedullin receptor binding;hormone activity;hormone activity;hormone activity;hormone activity;receptor binding;adrenomedullin receptor binding;adrenomedullin receptor binding;hormone activity;hormone activity;receptor binding;adrenomedullin receptor binding;hormone activity	GO:0005576;GO:0005576;GO:0005615;GO:0005737;GO:0005576;GO:0005576;GO:0005576;GO:0005576;GO:0005576;GO:0005615;GO:0005737;GO:0005615;GO:0005576;GO:0005576;GO:0005576;GO:0005615;GO:0005737;GO:0005576	extracellular region;extracellular region;extracellular space;cytoplasm;extracellular region;extracellular region;extracellular region;extracellular region;extracellular region;extracellular space;cytoplasm;extracellular space;extracellular region;extracellular region;extracellular region;extracellular space;cytoplasm;extracellular region
UNC5B	4.61394	2.206	5.08334e-13	3.35368e-11	UNC5B	GO:0007165;GO:0006915;GO:0007275;GO:0038007;GO:0001525;GO:0043524;GO:0014068;GO:2001240;GO:0033564;GO:0007165;GO:0006915;GO:0007275;GO:0038007;GO:0001525;GO:0043524;GO:0014068;GO:2001240	signal transduction;apoptotic process;multicellular organism development;netrin-activated signaling pathway;angiogenesis;negative regulation of neuron apoptotic process;positive regulation of phosphatidylinositol 3-kinase signaling;negative regulation of extrinsic apoptotic signaling pathway in absence of ligand;anterior/posterior axon guidance;signal transduction;apoptotic process;multicellular …	GO:0005515;GO:0005515;GO:0005042;GO:0005515;GO:0005515;GO:0005042	protein binding;protein binding;netrin receptor activity;protein binding;protein binding;netrin receptor activity	GO:0016020;GO:0016021;GO:0005886;GO:0045121;GO:0016020;GO:0016021;GO:0005886;GO:0045121	membrane;integral component of membrane;plasma membrane;membrane raft;membrane;integral component of membrane;plasma membrane;membrane raft
MTUS1	0.404441	-1.306	5.29235e-13	3.47348e-11	MTUS1	NA	NA	NA	NA	GO:0005634;GO:0005737;GO:0016020;GO:0005730;GO:0005794;GO:0005739;GO:0005886;GO:0015630;GO:0005856;GO:0005615;GO:0005874;GO:0005815;GO:0005819;GO:0005634;GO:0005737;GO:0016020;GO:0005730;GO:0005794;GO:0005739;GO:0005886;GO:0015630;GO:0005856;GO:0005615;GO:0005874;GO:0005815;GO:0005819;GO:0005634;GO:0005737;GO:0016020;GO:0005730;GO:0005794;GO:0005739;GO:0005886;GO:0015630;GO:0005856;GO:0005615;GO:…	nucleus;cytoplasm;membrane;nucleolus;Golgi apparatus;mitochondrion;plasma membrane;microtubule cytoskeleton;cytoskeleton;extracellular space;microtubule;microtubule organizing center;spindle;nucleus;cytoplasm;membrane;nucleolus;Golgi apparatus;mitochondrion;plasma membrane;microtubule cytoskeleton;cytoskeleton;extracellular space;microtubule;microtubule organizing center;spindle;nucleus;cytoplasm…
ARNTL	2.4777	1.309	5.34064e-13	3.48711e-11	ARNTL	GO:0006355;GO:0006366;GO:0006351;GO:0006355;GO:0048511;GO:0045893;GO:0045893;GO:0007283;GO:0045944;GO:0090263;GO:0045892;GO:0043161;GO:0007623;GO:0032007;GO:0032922;GO:0032922;GO:0042634;GO:0042753;GO:0045599;GO:0045944;GO:0050767;GO:0050796;GO:0051726;GO:0051775;GO:0090403;GO:1901985;GO:2000074;GO:2000323;GO:2000772;GO:2001016;GO:0006355;GO:0006366;GO:0006351;GO:0006355;GO:0048511;GO:0045893;GO:…	regulation of transcription, DNA-templated;transcription from RNA polymerase II promoter;transcription, DNA-templated;regulation of transcription, DNA-templated;rhythmic process;positive regulation of transcription, DNA-templated;positive regulation of transcription, DNA-templated;spermatogenesis;positive regulation of transcription from RNA polymerase II promoter;positive regulation of canonical…	GO:0046983;GO:0046983;GO:0003700;GO:0046983;GO:0003677;GO:0003677;GO:0005515;GO:0043565;GO:0000981;GO:0000981;GO:0001047;GO:0000976;GO:0000982;GO:0003677;GO:0017162;GO:0051879;GO:0070491;GO:0070888;GO:0003700;GO:0046983;GO:0003677;GO:0003677;GO:0005515;GO:0043565;GO:0000981;GO:0000981;GO:0001047;GO:0000976;GO:0000982;GO:0003677;GO:0017162;GO:0051879;GO:0070491;GO:0070888;GO:0003700;GO:0046983;GO:…	protein dimerization activity;protein dimerization activity;DNA binding transcription factor activity;protein dimerization activity;DNA binding;DNA binding;protein binding;sequence-specific DNA binding;RNA polymerase II transcription factor activity, sequence-specific DNA binding;RNA polymerase II transcription factor activity, sequence-specific DNA binding;core promoter binding;transcription reg…	GO:0005634;GO:0005737;GO:0005667;GO:0005634;GO:0043231;GO:0005654;GO:0005654;GO:0005667;GO:0016605;GO:0033391;GO:0005634;GO:0005737;GO:0005667;GO:0005634;GO:0043231;GO:0005654;GO:0005654;GO:0005667;GO:0016605;GO:0033391;GO:0005634;GO:0005737;GO:0005667;GO:0005634;GO:0005737;GO:0005667;GO:0005634;GO:0005737;GO:0005667;GO:0005634;GO:0043231;GO:0005654;GO:0005654;GO:0005667;GO:0016604;GO:0016605;GO:…	nucleus;cytoplasm;transcription factor complex;nucleus;intracellular membrane-bounded organelle;nucleoplasm;nucleoplasm;transcription factor complex;PML body;chromatoid body;nucleus;cytoplasm;transcription factor complex;nucleus;intracellular membrane-bounded organelle;nucleoplasm;nucleoplasm;transcription factor complex;PML body;chromatoid body;nucleus;cytoplasm;transcription factor complex;nucl…
DUSP5	2.30537	1.205	6.36993e-13	4.13784e-11	DUSP5	GO:0006470;GO:0016311;GO:0000188;GO:0000165;GO:0016311;GO:0035335;GO:0006470;GO:0035970;GO:0000187;GO:0001706	protein dephosphorylation;dephosphorylation;inactivation of MAPK activity;MAPK cascade;dephosphorylation;peptidyl-tyrosine dephosphorylation;protein dephosphorylation;peptidyl-threonine dephosphorylation;activation of MAPK activity;endoderm formation	GO:0016791;GO:0004725;GO:0008138;GO:0017017;GO:0016787;GO:0004721;GO:0005515;GO:0004725;GO:0016791;GO:0008138;GO:0008138	phosphatase activity;protein tyrosine phosphatase activity;protein tyrosine/serine/threonine phosphatase activity;MAP kinase tyrosine/serine/threonine phosphatase activity;hydrolase activity;phosphoprotein phosphatase activity;protein binding;protein tyrosine phosphatase activity;phosphatase activity;protein tyrosine/serine/threonine phosphatase activity;protein tyrosine/serine/threonine phosphat…	GO:0005634;GO:0005654	nucleus;nucleoplasm
COPS8	1.91189	0.935	7.01558e-13	4.534e-11	COPS8	GO:0010387;GO:0000338;GO:0008285;GO:0043687;GO:0007250;GO:0000338;GO:0006283;GO:0000715;GO:0010387;GO:0000338;GO:0008285;GO:0043687;GO:0007250;GO:0000338;GO:0006283;GO:0000715;GO:0010387;GO:0000338	COP9 signalosome assembly;protein deneddylation;negative regulation of cell proliferation;post-translational protein modification;activation of NF-kappaB-inducing kinase activity;protein deneddylation;transcription-coupled nucleotide-excision repair;nucleotide-excision repair, DNA damage recognition;COP9 signalosome assembly;protein deneddylation;negative regulation of cell proliferation;post-tra…	GO:0005515;GO:0005515	protein binding;protein binding	GO:0008180;GO:0005634;GO:0005737;GO:0005829;GO:0005654;GO:0048471;GO:0005654;GO:0005829;GO:0070062;GO:0008180;GO:0005634;GO:0008180;GO:0005634;GO:0005737;GO:0005829;GO:0005654;GO:0048471;GO:0005654;GO:0005829;GO:0070062;GO:0008180;GO:0005634;GO:0008180;GO:0005829;GO:0005654	COP9 signalosome;nucleus;cytoplasm;cytosol;nucleoplasm;perinuclear region of cytoplasm;nucleoplasm;cytosol;extracellular exosome;COP9 signalosome;nucleus;COP9 signalosome;nucleus;cytoplasm;cytosol;nucleoplasm;perinuclear region of cytoplasm;nucleoplasm;cytosol;extracellular exosome;COP9 signalosome;nucleus;COP9 signalosome;cytosol;nucleoplasm
ADAMTS9	2.9897	1.58	8.54236e-13	5.4927e-11	ADAMTS9	GO:0006508;GO:0015031;GO:0016192;GO:1903671;GO:0010596;GO:0006508;GO:0007275;GO:0006516;GO:0003179;GO:0035909;GO:0030198;GO:0003179;GO:0003229;GO:0003229;GO:0010596;GO:0030198;GO:0035909;GO:0045636;GO:0048070;GO:0090673;GO:0090673;GO:1903671;GO:0006508;GO:0015031;GO:0016192;GO:1903671;GO:0010596;GO:0006508;GO:0007275;GO:0006516;GO:0003179;GO:0035909;GO:0030198;GO:0003229;GO:0090673;GO:0006508;GO:…	proteolysis;protein transport;vesicle-mediated transport;negative regulation of sprouting angiogenesis;negative regulation of endothelial cell migration;proteolysis;multicellular organism development;glycoprotein catabolic process;heart valve morphogenesis;aorta morphogenesis;extracellular matrix organization;heart valve morphogenesis;ventricular cardiac muscle tissue development;ventricular card…	GO:0008270;GO:0004222;GO:0008237;GO:0046872;GO:0016787;GO:0008233;GO:0008237;GO:0004175;GO:0008237;GO:0008270;GO:0004222;GO:0008237;GO:0046872;GO:0016787;GO:0008233;GO:0008237;GO:0008237;GO:0008270;GO:0004222;GO:0008270;GO:0004222;GO:0004222;GO:0008237;GO:0046872	zinc ion binding;metalloendopeptidase activity;metallopeptidase activity;metal ion binding;hydrolase activity;peptidase activity;metallopeptidase activity;endopeptidase activity;metallopeptidase activity;zinc ion binding;metalloendopeptidase activity;metallopeptidase activity;metal ion binding;hydrolase activity;peptidase activity;metallopeptidase activity;metallopeptidase activity;zinc ion bindi…	GO:0043231;GO:0005783;GO:0005783;GO:0005576;GO:0005578;GO:0005578;GO:0031012;GO:0005615;GO:0009986;GO:0043231;GO:0005783;GO:0005783;GO:0005576;GO:0005578;GO:0005578;GO:0031012;GO:0043231;GO:0005783	intracellular membrane-bounded organelle;endoplasmic reticulum;endoplasmic reticulum;extracellular region;proteinaceous extracellular matrix;proteinaceous extracellular matrix;extracellular matrix;extracellular space;cell surface;intracellular membrane-bounded organelle;endoplasmic reticulum;endoplasmic reticulum;extracellular region;proteinaceous extracellular matrix;proteinaceous extracellular …
BICC1	1.99308	0.995	9.90991e-13	6.33984e-11	BICC1	GO:0007275;GO:0090090;GO:0007368;GO:0007507	multicellular organism development;negative regulation of canonical Wnt signaling pathway;determination of left/right symmetry;heart development	GO:0005515;GO:0003723;GO:0003676;GO:0003723	protein binding;RNA binding;nucleic acid binding;RNA binding	GO:0005737	cytoplasm
AIM2	0.225782	-2.147	1.09485e-12	6.96905e-11	AIM2	GO:0006915;GO:0006954;GO:0002376;GO:0045087;GO:0032088;GO:0006955;GO:0050718;GO:0051092;GO:0002218;GO:0002218;GO:0002230;GO:0002230;GO:0032461;GO:0032731;GO:0032731;GO:0033209;GO:0035458;GO:0035690;GO:0050702;GO:0050718;GO:0070269;GO:0070269;GO:2001056;GO:2001056	apoptotic process;inflammatory response;immune system process;innate immune response;negative regulation of NF-kappaB transcription factor activity;immune response;positive regulation of interleukin-1 beta secretion;positive regulation of NF-kappaB transcription factor activity;activation of innate immune response;activation of innate immune response;positive regulation of defense response to vir…	GO:0003677;GO:0005515;GO:0042802;GO:0003690;GO:0003690;GO:0042802	DNA binding;protein binding;identical protein binding;double-stranded DNA binding;double-stranded DNA binding;identical protein binding	GO:0005634;GO:0005737;GO:0005737;GO:0005829;GO:0005654;GO:0005739;GO:0005829;GO:0097169;GO:0097169;GO:0005654;GO:0005739	nucleus;cytoplasm;cytoplasm;cytosol;nucleoplasm;mitochondrion;cytosol;AIM2 inflammasome complex;AIM2 inflammasome complex;nucleoplasm;mitochondrion
AKAP6	0.317978	-1.653	1.21145e-12	7.67272e-11	AKAP6	GO:0035556;GO:0061051;GO:0010880;GO:0006605;GO:0071345;GO:0030307;GO:0060306;GO:0051281;GO:0001508;GO:0071320;GO:1901381;GO:1902261;GO:0019933;GO:0032516;GO:0060316;GO:0070886;GO:0010738;GO:0035556;GO:0061051;GO:0010880;GO:0006605;GO:0071345;GO:0030307;GO:0060306;GO:0051281;GO:0001508;GO:0071320;GO:1901381;GO:1902261;GO:0019933;GO:0032516;GO:0060316;GO:0070886;GO:0010738	intracellular signal transduction;positive regulation of cell growth involved in cardiac muscle cell development;regulation of release of sequestered calcium ion into cytosol by sarcoplasmic reticulum;protein targeting;cellular response to cytokine stimulus;positive regulation of cell growth;regulation of membrane repolarization;positive regulation of release of sequestered calcium ion into cytos…	GO:0005515;GO:0032947;GO:0044325;GO:0051018;GO:0008179;GO:0043495;GO:0034237;GO:0008179;GO:0051018;GO:0005515;GO:0032947;GO:0044325;GO:0051018;GO:0008179;GO:0043495;GO:0034237;GO:0051018;GO:0005515	protein binding;protein complex scaffold activity;ion channel binding;protein kinase A binding;adenylate cyclase binding;protein membrane anchor;protein kinase A regulatory subunit binding;adenylate cyclase binding;protein kinase A binding;protein binding;protein complex scaffold activity;ion channel binding;protein kinase A binding;adenylate cyclase binding;protein membrane anchor;protein kinase…	GO:0005634;GO:0016020;GO:0048471;GO:0048471;GO:0005737;GO:0016529;GO:0016529;GO:0031965;GO:0005635;GO:0014701;GO:0034704;GO:0005901;GO:0030315;GO:0014704;GO:0048471;GO:0005634;GO:0016020;GO:0048471;GO:0048471;GO:0005737;GO:0016529;GO:0016529;GO:0031965;GO:0005635;GO:0014701;GO:0034704;GO:0005901;GO:0030315;GO:0014704	nucleus;membrane;perinuclear region of cytoplasm;perinuclear region of cytoplasm;cytoplasm;sarcoplasmic reticulum;sarcoplasmic reticulum;nuclear membrane;nuclear envelope;junctional sarcoplasmic reticulum membrane;calcium channel complex;caveola;T-tubule;intercalated disc;perinuclear region of cytoplasm;nucleus;membrane;perinuclear region of cytoplasm;perinuclear region of cytoplasm;cytoplasm;sar…
PSG4	0.313383	-1.674	1.22931e-12	7.74712e-11	PSG4	GO:0007565;GO:0007565;GO:0007565	female pregnancy;female pregnancy;female pregnancy	NA	NA	GO:0005576;GO:0070062;GO:0005576;GO:0070062;GO:0005576;GO:0070062	extracellular region;extracellular exosome;extracellular region;extracellular exosome;extracellular region;extracellular exosome
FSTL3	3.17114	1.665	1.26499e-12	7.93251e-11	FSTL3	GO:0006351;GO:0006355;GO:0001822;GO:0007283;GO:0008584;GO:0030324;GO:0030325;GO:0030514;GO:0071248;GO:0045944;GO:0044267;GO:0043687;GO:0006357;GO:0001503;GO:0045671;GO:0030514;GO:0002244;GO:0022409;GO:0032926;GO:0090101	transcription, DNA-templated;regulation of transcription, DNA-templated;kidney development;spermatogenesis;male gonad development;lung development;adrenal gland development;negative regulation of BMP signaling pathway;cellular response to metal ion;positive regulation of transcription from RNA polymerase II promoter;cellular protein metabolic process;post-translational protein modification;regula…	GO:0005515;GO:0005515;GO:0048185;GO:0001968;GO:0048185;GO:0005515	protein binding;protein binding;activin binding;fibronectin binding;activin binding;protein binding	GO:0005634;GO:0005634;GO:0005654;GO:0005576;GO:0005615;GO:0005794;GO:0030141;GO:0044306;GO:0005615;GO:0005576;GO:0005788	nucleus;nucleus;nucleoplasm;extracellular region;extracellular space;Golgi apparatus;secretory granule;neuron projection terminus;extracellular space;extracellular region;endoplasmic reticulum lumen
TMEM100	5.00372	2.323	1.73674e-12	1.08371e-10	TMEM100	GO:0007275;GO:0030154;GO:0030509;GO:0051930;GO:2001214;GO:0071773;GO:0045603;GO:0007275;GO:0030154;GO:0030509;GO:0051930;GO:2001214;GO:0071773;GO:0045603;GO:0001525;GO:0001570;GO:0001701;GO:0003197;GO:0003198;GO:0007219;GO:0043491;GO:0045603;GO:0050848;GO:0051930;GO:0060842;GO:2001214	multicellular organism development;cell differentiation;BMP signaling pathway;regulation of sensory perception of pain;positive regulation of vasculogenesis;cellular response to BMP stimulus;positive regulation of endothelial cell differentiation;multicellular organism development;cell differentiation;BMP signaling pathway;regulation of sensory perception of pain;positive regulation of vasculogen…	GO:0005515;GO:0003674;GO:0005515;GO:0003674	protein binding;molecular_function;protein binding;molecular_function	GO:0005737;GO:0016020;GO:0016021;GO:0005783;GO:0005783;GO:0005886;GO:0005886;GO:0048471;GO:0048471;GO:0043204;GO:0043204;GO:0005737;GO:0016020;GO:0016021;GO:0005783;GO:0005783;GO:0005886;GO:0005886;GO:0048471;GO:0048471;GO:0043204;GO:0043204;GO:0016020;GO:0016021	cytoplasm;membrane;integral component of membrane;endoplasmic reticulum;endoplasmic reticulum;plasma membrane;plasma membrane;perinuclear region of cytoplasm;perinuclear region of cytoplasm;perikaryon;perikaryon;cytoplasm;membrane;integral component of membrane;endoplasmic reticulum;endoplasmic reticulum;plasma membrane;plasma membrane;perinuclear region of cytoplasm;perinuclear region of cytopla…
TMTC1	2.18707	1.129	1.85369e-12	1.15101e-10	TMTC1	GO:0006396;GO:0006396;GO:0006396	RNA processing;RNA processing;RNA processing	GO:0005515;GO:0005515;GO:0005515;GO:0005515;GO:0005515	protein binding;protein binding;protein binding;protein binding;protein binding	GO:0016020;GO:0016021;GO:0016020;GO:0016021;GO:0016020;GO:0016021;GO:0016020;GO:0016021;GO:0005739;GO:0016020;GO:0016021	membrane;integral component of membrane;membrane;integral component of membrane;membrane;integral component of membrane;membrane;integral component of membrane;mitochondrion;membrane;integral component of membrane
SOX9	0.492092	-1.023	2.34637e-12	1.44983e-10	SOX9	GO:0006355;GO:0006351;GO:0006334;GO:0007165;GO:0045893;GO:0045893;GO:0007283;GO:0045944;GO:0001934;GO:0001501;GO:0090090;GO:0008584;GO:0008584;GO:0071347;GO:0071260;GO:0008284;GO:0042127;GO:0042981;GO:0043066;GO:0043066;GO:0070371;GO:0001502;GO:0032332;GO:0032332;GO:0051216;GO:0045892;GO:0006367;GO:0019933;GO:0071560;GO:0007173;GO:0045662;GO:0060041;GO:0002062;GO:1902894;GO:0071300;GO:0065003;GO:…	regulation of transcription, DNA-templated;transcription, DNA-templated;nucleosome assembly;signal transduction;positive regulation of transcription, DNA-templated;positive regulation of transcription, DNA-templated;spermatogenesis;positive regulation of transcription from RNA polymerase II promoter;positive regulation of protein phosphorylation;skeletal system development;negative regulation of …	GO:0000981;GO:0003677;GO:0003700;GO:0003700;GO:0005515;GO:0000981;GO:0000981;GO:0003682;GO:0004672;GO:0001046;GO:0001077;GO:0034236;GO:0001158;GO:0003705;GO:0035326;GO:0000976;GO:0001077;GO:0001158;GO:0001228;GO:0003700;GO:0003705;GO:0004672;GO:0008013;GO:0035326;GO:0043425;GO:0043565;GO:0044212;GO:0046982;GO:0097157;GO:0000981	RNA polymerase II transcription factor activity, sequence-specific DNA binding;DNA binding;DNA binding transcription factor activity;DNA binding transcription factor activity;protein binding;RNA polymerase II transcription factor activity, sequence-specific DNA binding;RNA polymerase II transcription factor activity, sequence-specific DNA binding;chromatin binding;protein kinase activity;core pro…	GO:0005634;GO:0005634;GO:0005654;GO:0005654;GO:0032991;GO:0005667;GO:0044798;GO:0005634	nucleus;nucleus;nucleoplasm;nucleoplasm;macromolecular complex;transcription factor complex;nuclear transcription factor complex;nucleus
NFATC2	3.25577	1.703	2.43168e-12	1.49525e-10	NFATC2	GO:0006355;GO:0006366;GO:0006351;GO:0006355;GO:0006974;GO:0038095;GO:0016477;GO:0050853;GO:0045893;GO:0042493;GO:0045589;GO:0030890;GO:0006355;GO:0006366;GO:0006351;GO:0006355;GO:0006974;GO:0038095;GO:0016477;GO:0050853;GO:0045893;GO:0042493;GO:0045589;GO:0030890;GO:0000122;GO:0001816;GO:0010628;GO:0014904;GO:0033173;GO:0045944;GO:1901741;GO:0006355;GO:0006366;GO:0006351;GO:0006355;GO:0006974;GO:…	regulation of transcription, DNA-templated;transcription from RNA polymerase II promoter;transcription, DNA-templated;regulation of transcription, DNA-templated;cellular response to DNA damage stimulus;Fc-epsilon receptor signaling pathway;cell migration;B cell receptor signaling pathway;positive regulation of transcription, DNA-templated;response to drug;regulation of regulatory T cell different…	GO:0003677;GO:0003700;GO:0003677;GO:0003700;GO:0005515;GO:0000981;GO:0000981;GO:0019902;GO:0003677;GO:0003700;GO:0003677;GO:0003700;GO:0005515;GO:0000981;GO:0000981;GO:0019902;GO:0000976;GO:0000978;GO:0000981;GO:0001077;GO:0001078;GO:0003682;GO:0008134;GO:0043565;GO:0044212;GO:0003677;GO:0003700;GO:0003677;GO:0003700;GO:0005515;GO:0000981;GO:0000981;GO:0019902;GO:0003677;GO:0003700;GO:0003677;GO:…	DNA binding;DNA binding transcription factor activity;DNA binding;DNA binding transcription factor activity;protein binding;RNA polymerase II transcription factor activity, sequence-specific DNA binding;RNA polymerase II transcription factor activity, sequence-specific DNA binding;phosphatase binding;DNA binding;DNA binding transcription factor activity;DNA binding;DNA binding transcription facto…	GO:0005634;GO:0005634;GO:0005634;GO:0005737;GO:0005737;GO:0005737;GO:0005829;GO:0005654;GO:0005654;GO:0005829;GO:0005634;GO:0005634;GO:0005634;GO:0005737;GO:0005737;GO:0005737;GO:0005829;GO:0005654;GO:0005654;GO:0005829;GO:0000790;GO:0005667;GO:0005829;GO:0030529;GO:0044798;GO:0005634;GO:0005634;GO:0005634;GO:0005737;GO:0005737;GO:0005737;GO:0005829;GO:0005654;GO:0005654;GO:0005829;GO:0005634;GO:…	nucleus;nucleus;nucleus;cytoplasm;cytoplasm;cytoplasm;cytosol;nucleoplasm;nucleoplasm;cytosol;nucleus;nucleus;nucleus;cytoplasm;cytoplasm;cytoplasm;cytosol;nucleoplasm;nucleoplasm;cytosol;nuclear chromatin;transcription factor complex;cytosol;intracellular ribonucleoprotein complex;nuclear transcription factor complex;nucleus;nucleus;nucleus;cytoplasm;cytoplasm;cytoplasm;cytosol;nucleoplasm;nucle…
PALLD	1.85446	0.891	2.85428e-12	1.74662e-10	PALLD	GO:0030036;GO:0016477;GO:0007010;GO:0030036;GO:0016477;GO:0003334;GO:0003382;GO:0007010;GO:0030036;GO:0016477;GO:0007010;GO:0030036;GO:0016477;GO:0007010;GO:0030036;GO:0016477	actin cytoskeleton organization;cell migration;cytoskeleton organization;actin cytoskeleton organization;cell migration;keratinocyte development;epithelial cell morphogenesis;cytoskeleton organization;actin cytoskeleton organization;cell migration;cytoskeleton organization;actin cytoskeleton organization;cell migration;cytoskeleton organization;actin cytoskeleton organization;cell migration	GO:0003779;GO:0005515;GO:0051371;GO:0003779;GO:0005515;GO:0051371;GO:0003779;GO:0005515;GO:0051371;GO:0003779;GO:0005515;GO:0051371	actin binding;protein binding;muscle alpha-actinin binding;actin binding;protein binding;muscle alpha-actinin binding;actin binding;protein binding;muscle alpha-actinin binding;actin binding;protein binding;muscle alpha-actinin binding	GO:0005737;GO:0005829;GO:0005886;GO:0015629;GO:0005856;GO:0042995;GO:0030054;GO:0005925;GO:0005925;GO:0030424;GO:0030027;GO:0030426;GO:0002102;GO:0005634;GO:0030018;GO:0001726;GO:0005884;GO:0005737;GO:0005829;GO:0005886;GO:0015629;GO:0005856;GO:0042995;GO:0030054;GO:0005925;GO:0005925;GO:0030424;GO:0030027;GO:0030426;GO:0002102;GO:0005634;GO:0030018;GO:0001726;GO:0005884;GO:0005737;GO:0005829;GO:…	cytoplasm;cytosol;plasma membrane;actin cytoskeleton;cytoskeleton;cell projection;cell junction;focal adhesion;focal adhesion;axon;lamellipodium;growth cone;podosome;nucleus;Z disc;ruffle;actin filament;cytoplasm;cytosol;plasma membrane;actin cytoskeleton;cytoskeleton;cell projection;cell junction;focal adhesion;focal adhesion;axon;lamellipodium;growth cone;podosome;nucleus;Z disc;ruffle;actin fi…
SLC16A3	1.78262	0.834	3.4058e-12	2.0741e-10	SLC16A3	GO:0055085;GO:0015718;GO:0035873;GO:0055085;GO:0015718;GO:0035873;GO:0055085;GO:0015718;GO:0050900;GO:0006090;GO:0015718;GO:0055085;GO:0015718;GO:0035873;GO:0055085;GO:0015718;GO:0035873;GO:0015718;GO:0035873;GO:0055085;GO:0015718;GO:0035873;GO:0055085;GO:0015718;GO:0035879;GO:0050900;GO:0006090;GO:0015718;GO:0015718;GO:0035873;GO:0055085;GO:0015718;GO:0035873;GO:0055085;GO:0015718;GO:0035873;GO:…	transmembrane transport;monocarboxylic acid transport;lactate transmembrane transport;transmembrane transport;monocarboxylic acid transport;lactate transmembrane transport;transmembrane transport;monocarboxylic acid transport;leukocyte migration;pyruvate metabolic process;monocarboxylic acid transport;transmembrane transport;monocarboxylic acid transport;lactate transmembrane transport;transmembr…	GO:0008028;GO:0015129;GO:0008028;GO:0015129;GO:0008028;GO:0015129;GO:0003723;GO:0015293;GO:0005515;GO:0008028;GO:0008028;GO:0015129;GO:0008028;GO:0015129;GO:0008028;GO:0015129;GO:0008028;GO:0015129;GO:0008028;GO:0015129;GO:0008028;GO:0015129;GO:0003723;GO:0015293;GO:0005515;GO:0008028;GO:0008028;GO:0015129;GO:0008028;GO:0015129;GO:0008028;GO:0015129;GO:0008028;GO:0015129;GO:0008028;GO:0015129;GO:…	monocarboxylic acid transmembrane transporter activity;lactate transmembrane transporter activity;monocarboxylic acid transmembrane transporter activity;lactate transmembrane transporter activity;monocarboxylic acid transmembrane transporter activity;lactate transmembrane transporter activity;RNA binding;symporter activity;protein binding;monocarboxylic acid transmembrane transporter activity;mon…	GO:0016021;GO:0005887;GO:0016020;GO:0016021;GO:0005887;GO:0016020;GO:0016021;GO:0005887;GO:0016020;GO:0031965;GO:0005886;GO:0005886;GO:0005886;GO:0016021;GO:0005887;GO:0016020;GO:0016021;GO:0005887;GO:0016020;GO:0016021;GO:0005887;GO:0016020;GO:0005887;GO:0016020;GO:0016021;GO:0016021;GO:0005887;GO:0016020;GO:0016021;GO:0005887;GO:0016020;GO:0031965;GO:0005886;GO:0005886;GO:0005886;GO:0016021;GO:…	integral component of membrane;integral component of plasma membrane;membrane;integral component of membrane;integral component of plasma membrane;membrane;integral component of membrane;integral component of plasma membrane;membrane;nuclear membrane;plasma membrane;plasma membrane;plasma membrane;integral component of membrane;integral component of plasma membrane;membrane;integral component of …
LINC00707	0.177637	-2.493	3.86639e-12	2.34333e-10	LINC00707	NA	NA	NA	NA	NA	NA
TBC1D8	1.9172	0.939	3.90642e-12	2.35631e-10	TBC1D8	GO:0006886;GO:0031338;GO:0090630;GO:0008284;GO:0008015	intracellular protein transport;regulation of vesicle fusion;activation of GTPase activity;positive regulation of cell proliferation;blood circulation	GO:0005096;GO:0005096;GO:0017137	GTPase activator activity;GTPase activator activity;Rab GTPase binding	GO:0005622;GO:0012505;GO:0016020	intracellular;endomembrane system;membrane
TTC7A	1.8391	0.879	3.97593e-12	2.38688e-10	TTC7A	GO:0072659;GO:0072659;GO:0006879;GO:0030097	protein localization to plasma membrane;protein localization to plasma membrane;cellular iron ion homeostasis;hemopoiesis	GO:0005515;GO:0005515;GO:0005515	protein binding;protein binding;protein binding	GO:0005737;GO:0016020;GO:0005886;GO:0005737;GO:0016020;GO:0005886	cytoplasm;membrane;plasma membrane;cytoplasm;membrane;plasma membrane
RAP1GAP	0.369591	-1.436	4.61285e-12	2.75618e-10	RAP1GAP	GO:0051056;GO:0050790;GO:0043547;GO:0045665;GO:1904425;GO:1904442;GO:1990792;GO:0051056;GO:0050790;GO:0043547;GO:0050790;GO:0043547;GO:0051056;GO:0051056;GO:0050790;GO:0043547;GO:0007165;GO:0043547;GO:0007165;GO:0007411;GO:0043087;GO:1903697;GO:0051056;GO:0007165;GO:0043547;GO:0007165;GO:0007411;GO:0043087;GO:1903697;GO:0051056;GO:0007165;GO:0043547;GO:0007165;GO:0007411;GO:0043087;GO:1903697;GO:…	regulation of small GTPase mediated signal transduction;regulation of catalytic activity;positive regulation of GTPase activity;negative regulation of neuron differentiation;negative regulation of GTP binding;negative regulation of thyroid gland epithelial cell proliferation;cellular response to glial cell derived neurotrophic factor;regulation of small GTPase mediated signal transduction;regulat…	GO:0005096;GO:0030695;GO:0005096;GO:0030695;GO:0030695;GO:0005096;GO:0005096;GO:0030695;GO:0042803;GO:0005515;GO:0003924;GO:0005096;GO:0005096;GO:0005096;GO:0017016;GO:0005096;GO:0030695;GO:0042803;GO:0005515;GO:0003924;GO:0005096;GO:0005096;GO:0005096;GO:0017016;GO:0005096;GO:0030695;GO:0042803;GO:0005515;GO:0003924;GO:0005096;GO:0005096;GO:0005096;GO:0017016;GO:0030695;GO:0030695;GO:0005096;GO:…	GTPase activator activity;GTPase regulator activity;GTPase activator activity;GTPase regulator activity;GTPase regulator activity;GTPase activator activity;GTPase activator activity;GTPase regulator activity;protein homodimerization activity;protein binding;GTPase activity;GTPase activator activity;GTPase activator activity;GTPase activator activity;Ras GTPase binding;GTPase activator activity;GT…	GO:0005769;GO:0005829;GO:0016020;GO:0030424;GO:0030425;GO:0043025;GO:0016020;GO:0016020;GO:0005794;GO:0005829;GO:0000139;GO:0005829;GO:0016020;GO:0016020;GO:0005794;GO:0005829;GO:0000139;GO:0005829;GO:0016020;GO:0016020;GO:0005794;GO:0005829;GO:0000139;GO:0005829	early endosome;cytosol;membrane;axon;dendrite;neuronal cell body;membrane;membrane;Golgi apparatus;cytosol;Golgi membrane;cytosol;membrane;membrane;Golgi apparatus;cytosol;Golgi membrane;cytosol;membrane;membrane;Golgi apparatus;cytosol;Golgi membrane;cytosol
DUBR	2.72074	1.444	4.83616e-12	2.87604e-10	DUBR	NA	NA	NA	NA	NA	NA
CD22	0.25349	-1.98	5.51128e-12	3.26222e-10	CD22	GO:0007155;GO:0007155;GO:0007155;GO:0007155;GO:0007155;GO:0007155;GO:0007155;GO:0007155;GO:0007155;GO:0007155;GO:0007155;GO:0007155	cell adhesion;cell adhesion;cell adhesion;cell adhesion;cell adhesion;cell adhesion;cell adhesion;cell adhesion;cell adhesion;cell adhesion;cell adhesion;cell adhesion	GO:0030246;GO:0005515;GO:0030246;GO:0005515;GO:0030246;GO:0005515;GO:0030246;GO:0005515;GO:0030246;GO:0005515;GO:0030246;GO:0005515	carbohydrate binding;protein binding;carbohydrate binding;protein binding;carbohydrate binding;protein binding;carbohydrate binding;protein binding;carbohydrate binding;protein binding;carbohydrate binding;protein binding	GO:0016020;GO:0016021;GO:0005886;GO:0005886;GO:0070062;GO:0016020;GO:0016021;GO:0005886;GO:0005886;GO:0070062;GO:0016020;GO:0016021;GO:0005886;GO:0005886;GO:0070062;GO:0016020;GO:0016021;GO:0005886;GO:0005886;GO:0070062;GO:0016020;GO:0016021;GO:0005886;GO:0005886;GO:0070062;GO:0016020;GO:0016021;GO:0005886;GO:0005886;GO:0070062	membrane;integral component of membrane;plasma membrane;plasma membrane;extracellular exosome;membrane;integral component of membrane;plasma membrane;plasma membrane;extracellular exosome;membrane;integral component of membrane;plasma membrane;plasma membrane;extracellular exosome;membrane;integral component of membrane;plasma membrane;plasma membrane;extracellular exosome;membrane;integral compo…
TENM2	0.354044	-1.498	5.84031e-12	3.44089e-10	TENM2	GO:0007165;GO:0097264;GO:0006351;GO:0006355;GO:0007155;GO:0000122;GO:0051491;GO:0007157;GO:0098609;GO:0000902;GO:0048666;GO:0007165;GO:0097264;GO:0007165;GO:0097264	signal transduction;self proteolysis;transcription, DNA-templated;regulation of transcription, DNA-templated;cell adhesion;negative regulation of transcription from RNA polymerase II promoter;positive regulation of filopodium assembly;heterophilic cell-cell adhesion via plasma membrane cell adhesion molecules;cell-cell adhesion;cell morphogenesis;neuron development;signal transduction;self proteo…	GO:0005509;GO:0042803;GO:0046982;GO:0042803;GO:0050839;GO:0046982;GO:0005509;GO:0005509	calcium ion binding;protein homodimerization activity;protein heterodimerization activity;protein homodimerization activity;cell adhesion molecule binding;protein heterodimerization activity;calcium ion binding;calcium ion binding	GO:0016021;GO:0005887;GO:0005634;GO:0005634;GO:0016020;GO:0005794;GO:0005794;GO:0005783;GO:0005783;GO:0005886;GO:0005886;GO:0042995;GO:0030054;GO:0030054;GO:0045202;GO:0045202;GO:0045211;GO:0045211;GO:0030425;GO:0005887;GO:0030175;GO:0030175;GO:0030426;GO:0030426;GO:0043197;GO:0043197;GO:0043005;GO:0043005;GO:0043005;GO:0016605;GO:0016605;GO:0016021;GO:0005887;GO:0016020;GO:0016021;GO:0005887;GO:…	integral component of membrane;integral component of plasma membrane;nucleus;nucleus;membrane;Golgi apparatus;Golgi apparatus;endoplasmic reticulum;endoplasmic reticulum;plasma membrane;plasma membrane;cell projection;cell junction;cell junction;synapse;synapse;postsynaptic membrane;postsynaptic membrane;dendrite;integral component of plasma membrane;filopodium;filopodium;growth cone;growth cone;…
FSCN1	1.88296	0.913	7.31302e-12	4.28861e-10	FSCN1	GO:0007015;GO:0030036;GO:0016477;GO:0032956;GO:0016477;GO:0009653;GO:0051017;GO:0019221;GO:0051491;GO:0051491;GO:0008283;GO:0007043;GO:0030036;GO:0032534;GO:0030036;GO:0051017;GO:0010592;GO:0030035;GO:0030035;GO:0048870;GO:0090091;GO:0071803;GO:0035089;GO:0051017;GO:0007015;GO:0030036;GO:0016477;GO:0007015;GO:0030036;GO:0016477;GO:0007015;GO:0030036;GO:0016477	actin filament organization;actin cytoskeleton organization;cell migration;regulation of actin cytoskeleton organization;cell migration;anatomical structure morphogenesis;actin filament bundle assembly;cytokine-mediated signaling pathway;positive regulation of filopodium assembly;positive regulation of filopodium assembly;cell proliferation;cell-cell junction assembly;actin cytoskeleton organizat…	GO:0051015;GO:0030674;GO:0003723;GO:0003779;GO:0003779;GO:0005515;GO:0045296;GO:0051015;GO:0008144;GO:0008144;GO:0051015;GO:0030674;GO:0051015;GO:0030674;GO:0051015;GO:0030674	actin filament binding;protein binding, bridging;RNA binding;actin binding;actin binding;protein binding;cadherin binding;actin filament binding;drug binding;drug binding;actin filament binding;protein binding, bridging;actin filament binding;protein binding, bridging;actin filament binding;protein binding, bridging	GO:0005737;GO:0005737;GO:0005829;GO:0005829;GO:0005856;GO:0005856;GO:0042995;GO:0030054;GO:0005829;GO:0030027;GO:0030175;GO:0030175;GO:0030426;GO:0070062;GO:0002102;GO:0001725;GO:0071437;GO:0071437;GO:0005902;GO:0005902;GO:0031941;GO:0001726;GO:0015629;GO:0005911;GO:0015629;GO:0030426;GO:0031253;GO:0030027;GO:0030027;GO:0030426;GO:0043209;GO:0044393	cytoplasm;cytoplasm;cytosol;cytosol;cytoskeleton;cytoskeleton;cell projection;cell junction;cytosol;lamellipodium;filopodium;filopodium;growth cone;extracellular exosome;podosome;stress fiber;invadopodium;invadopodium;microvillus;microvillus;filamentous actin;ruffle;actin cytoskeleton;cell-cell junction;actin cytoskeleton;growth cone;cell projection membrane;lamellipodium;lamellipodium;growth con…
PER2	0.388773	-1.363	7.40871e-12	4.32471e-10	PER2	GO:0006351;GO:0006355;GO:0006631;GO:0048511;GO:0006094;GO:0000122;GO:0005978;GO:0045892;GO:0007623;GO:0032922;GO:0050767;GO:0050796;GO:0051726;GO:0070345;GO:0031397;GO:0000122;GO:0002931;GO:0007623;GO:0019229;GO:0019249;GO:0042752;GO:0042754;GO:0045892;GO:0050872;GO:0051946;GO:0070932;GO:0097167;GO:2000678	transcription, DNA-templated;regulation of transcription, DNA-templated;fatty acid metabolic process;rhythmic process;gluconeogenesis;negative regulation of transcription from RNA polymerase II promoter;glycogen biosynthetic process;negative regulation of transcription, DNA-templated;circadian rhythm;circadian regulation of gene expression;regulation of neurogenesis;regulation of insulin secretio…	GO:0005515;GO:0005515;GO:0003713;GO:0000976;GO:0000989;GO:0000989	protein binding;protein binding;transcription coactivator activity;transcription regulatory region sequence-specific DNA binding;transcription factor activity, transcription factor binding;transcription factor activity, transcription factor binding	GO:0005634;GO:0005634;GO:0005634;GO:0005737;GO:0048471;GO:0005730	nucleus;nucleus;nucleus;cytoplasm;perinuclear region of cytoplasm;nucleolus
HPS5	1.95884	0.97	9.04567e-12	5.25603e-10	HPS5	GO:0006996;GO:0007596;GO:0043473	organelle organization;blood coagulation;pigmentation	GO:0005515;GO:0005515;GO:0005515;GO:0005515;GO:0005515;GO:0005515;GO:0005515	protein binding;protein binding;protein binding;protein binding;protein binding;protein binding;protein binding	GO:0005737;GO:0005829;GO:0031084;GO:0005737;GO:0005829;GO:0031084;GO:0005737;GO:0005829;GO:0031084	cytoplasm;cytosol;BLOC-2 complex;cytoplasm;cytosol;BLOC-2 complex;cytoplasm;cytosol;BLOC-2 complex
AKAP12	2.84613	1.509	9.66276e-12	5.58896e-10	AKAP12	GO:0007165;GO:0006605;GO:0010739;GO:0090036;GO:0007186;GO:0007193;GO:0010738;GO:0007165;GO:0006605;GO:0010739;GO:0090036;GO:0007186;GO:0007193;GO:0010738;GO:0007165;GO:0006605;GO:0010739;GO:0090036;GO:0007186;GO:0007193;GO:0010738;GO:0007165;GO:0006605;GO:0010739;GO:0090036;GO:0007186;GO:0007193;GO:0010738	signal transduction;protein targeting;positive regulation of protein kinase A signaling;regulation of protein kinase C signaling;G-protein coupled receptor signaling pathway;adenylate cyclase-inhibiting G-protein coupled receptor signaling pathway;regulation of protein kinase A signaling;signal transduction;protein targeting;positive regulation of protein kinase A signaling;regulation of protein …	GO:0051018;GO:0005515;GO:0051018;GO:0008179;GO:0051018;GO:0005515;GO:0051018;GO:0008179;GO:0051018;GO:0005515;GO:0051018;GO:0008179;GO:0051018;GO:0005515;GO:0051018;GO:0008179	protein kinase A binding;protein binding;protein kinase A binding;adenylate cyclase binding;protein kinase A binding;protein binding;protein kinase A binding;adenylate cyclase binding;protein kinase A binding;protein binding;protein kinase A binding;adenylate cyclase binding;protein kinase A binding;protein binding;protein kinase A binding;adenylate cyclase binding	GO:0005737;GO:0016020;GO:0005829;GO:0005886;GO:0005856;GO:0005925;GO:0005938;GO:0005737;GO:0005737;GO:0016020;GO:0005829;GO:0005886;GO:0005856;GO:0005925;GO:0005938;GO:0005737;GO:0005737;GO:0016020;GO:0005829;GO:0005886;GO:0005856;GO:0005925;GO:0005938;GO:0005737;GO:0005737;GO:0016020;GO:0005829;GO:0005886;GO:0005856;GO:0005925;GO:0005938;GO:0005737	cytoplasm;membrane;cytosol;plasma membrane;cytoskeleton;focal adhesion;cell cortex;cytoplasm;cytoplasm;membrane;cytosol;plasma membrane;cytoskeleton;focal adhesion;cell cortex;cytoplasm;cytoplasm;membrane;cytosol;plasma membrane;cytoskeleton;focal adhesion;cell cortex;cytoplasm;cytoplasm;membrane;cytosol;plasma membrane;cytoskeleton;focal adhesion;cell cortex;cytoplasm
GAS6	2.55974	1.356	9.76498e-12	5.62241e-10	GAS6	GO:0007155;GO:0010469;GO:0007165;GO:0007165;GO:0070588;GO:0050900;GO:0006915;GO:0001934;GO:0001934;GO:0033138;GO:0010628;GO:0044267;GO:0040008;GO:0016477;GO:0043687;GO:0008283;GO:0007050;GO:0016032;GO:0043066;GO:0032689;GO:0032720;GO:2000510;GO:0070527;GO:0002576;GO:0085029;GO:0043433;GO:0045892;GO:0006909;GO:0050766;GO:0046718;GO:0006468;GO:0035754;GO:0006888;GO:0033159;GO:0035690;GO:2000352;GO:…	cell adhesion;regulation of receptor activity;signal transduction;signal transduction;calcium ion transmembrane transport;leukocyte migration;apoptotic process;positive regulation of protein phosphorylation;positive regulation of protein phosphorylation;positive regulation of peptidyl-serine phosphorylation;positive regulation of gene expression;cellular protein metabolic process;regulation of gr…	GO:0005509;GO:0046872;GO:0005515;GO:0005102;GO:0005102;GO:0005245;GO:0030971;GO:0001786;GO:0043027;GO:0060090;GO:0030296;GO:0048018;GO:0048018	calcium ion binding;metal ion binding;protein binding;receptor binding;receptor binding;voltage-gated calcium channel activity;receptor tyrosine kinase binding;phosphatidylserine binding;cysteine-type endopeptidase inhibitor activity involved in apoptotic process;molecular adaptor activity;protein tyrosine kinase activator activity;receptor ligand activity;receptor ligand activity	GO:0005576;GO:0005737;GO:0005615;GO:0005576;GO:0070062;GO:0005788;GO:0031093;GO:0005796;GO:0005615;GO:0005622	extracellular region;cytoplasm;extracellular space;extracellular region;extracellular exosome;endoplasmic reticulum lumen;platelet alpha granule lumen;Golgi lumen;extracellular space;intracellular
ZFYVE28	3.05252	1.61	1.00398e-11	5.75446e-10	ZFYVE28	GO:0007175;GO:0042059;GO:0007175;GO:0042059;GO:0007175;GO:0042059;GO:0007175;GO:0042059;GO:0007175;GO:0042059;GO:0007175;GO:0042059	negative regulation of epidermal growth factor-activated receptor activity;negative regulation of epidermal growth factor receptor signaling pathway;negative regulation of epidermal growth factor-activated receptor activity;negative regulation of epidermal growth factor receptor signaling pathway;negative regulation of epidermal growth factor-activated receptor activity;negative regulation of epi…	GO:0046872;GO:0046872;GO:0005515;GO:0032266;GO:0046872;GO:0005515;GO:0032266;GO:0046872;GO:0005515;GO:0032266;GO:0046872;GO:0005515;GO:0032266;GO:0046872;GO:0005515;GO:0032266;GO:0046872;GO:0005515;GO:0032266	metal ion binding;metal ion binding;protein binding;phosphatidylinositol-3-phosphate binding;metal ion binding;protein binding;phosphatidylinositol-3-phosphate binding;metal ion binding;protein binding;phosphatidylinositol-3-phosphate binding;metal ion binding;protein binding;phosphatidylinositol-3-phosphate binding;metal ion binding;protein binding;phosphatidylinositol-3-phosphate binding;metal …	GO:0005737;GO:0016020;GO:0005829;GO:0005829;GO:0005768;GO:0031901;GO:0031901;GO:0005737;GO:0016020;GO:0005829;GO:0005829;GO:0005768;GO:0031901;GO:0031901;GO:0005737;GO:0016020;GO:0005829;GO:0005829;GO:0005768;GO:0031901;GO:0031901;GO:0005737;GO:0016020;GO:0005829;GO:0005829;GO:0005768;GO:0031901;GO:0031901;GO:0005737;GO:0016020;GO:0005829;GO:0005829;GO:0005768;GO:0031901;GO:0031901;GO:0005737;GO:…	cytoplasm;membrane;cytosol;cytosol;endosome;early endosome membrane;early endosome membrane;cytoplasm;membrane;cytosol;cytosol;endosome;early endosome membrane;early endosome membrane;cytoplasm;membrane;cytosol;cytosol;endosome;early endosome membrane;early endosome membrane;cytoplasm;membrane;cytosol;cytosol;endosome;early endosome membrane;early endosome membrane;cytoplasm;membrane;cytosol;cyto…
RNF115	1.78386	0.835	1.03386e-11	5.89908e-10	RNF115	GO:0016567;GO:0051865;GO:0043161;GO:0000209;GO:0000209;GO:0070534;GO:0070936;GO:0043162;GO:0042059;GO:0070534;GO:0070936	protein ubiquitination;protein autoubiquitination;proteasome-mediated ubiquitin-dependent protein catabolic process;protein polyubiquitination;protein polyubiquitination;protein K63-linked ubiquitination;protein K48-linked ubiquitination;ubiquitin-dependent protein catabolic process via the multivesicular body sorting pathway;negative regulation of epidermal growth factor receptor signaling pathw…	GO:0046872;GO:0016740;GO:0005515;GO:0004842;GO:0061630;GO:0004842;GO:0004842;GO:0061630;GO:0061630	metal ion binding;transferase activity;protein binding;ubiquitin-protein transferase activity;ubiquitin protein ligase activity;ubiquitin-protein transferase activity;ubiquitin-protein transferase activity;ubiquitin protein ligase activity;ubiquitin protein ligase activity	GO:0005737;GO:0005829;GO:0005829;GO:0005829;GO:0005829	cytoplasm;cytosol;cytosol;cytosol;cytosol
TMEM44	1.93187	0.95	1.08163e-11	6.14393e-10	TMEM44	NA	NA	NA	NA	GO:0016020;GO:0016021;GO:0016020;GO:0016020;GO:0016020;GO:0016020;GO:0016020;GO:0016021;GO:0016020;GO:0016021	membrane;integral component of membrane;membrane;membrane;membrane;membrane;membrane;integral component of membrane;membrane;integral component of membrane
MMP16	0.336342	-1.572	1.09931e-11	6.2165e-10	MMP16	GO:0006508;GO:0043085;GO:0006508;GO:0006508;GO:0022617;GO:0030574;GO:0016485;GO:0001503;GO:0001958;GO:0019538;GO:0035988;GO:0048701;GO:0060348;GO:0097094;GO:0006508	proteolysis;positive regulation of catalytic activity;proteolysis;proteolysis;extracellular matrix disassembly;collagen catabolic process;protein processing;ossification;endochondral ossification;protein metabolic process;chondrocyte proliferation;embryonic cranial skeleton morphogenesis;bone development;craniofacial suture morphogenesis;proteolysis	GO:0008270;GO:0004222;GO:0008237;GO:0046872;GO:0016787;GO:0008233;GO:0004222;GO:0008270;GO:0008047;GO:0004222;GO:0008270;GO:0070006;GO:0070006;GO:0008270;GO:0004222;GO:0008237;GO:0046872;GO:0016787;GO:0008233	zinc ion binding;metalloendopeptidase activity;metallopeptidase activity;metal ion binding;hydrolase activity;peptidase activity;metalloendopeptidase activity;zinc ion binding;enzyme activator activity;metalloendopeptidase activity;zinc ion binding;metalloaminopeptidase activity;metalloaminopeptidase activity;zinc ion binding;metalloendopeptidase activity;metallopeptidase activity;metal ion bindi…	GO:0031012;GO:0016020;GO:0016021;GO:0005886;GO:0005576;GO:0005578;GO:0005886;GO:0009986;GO:0005796;GO:0005887;GO:0031012	extracellular matrix;membrane;integral component of membrane;plasma membrane;extracellular region;proteinaceous extracellular matrix;plasma membrane;cell surface;Golgi lumen;integral component of plasma membrane;extracellular matrix
SLC7A7	4.93483	2.303	1.37654e-11	7.68135e-10	SLC7A7	GO:0055085;GO:1990822;GO:0050900;GO:0006865;GO:1902475;GO:0065003;GO:0006520;GO:0006865;GO:0000821;GO:0055085;GO:1990822;GO:0050900;GO:0006865;GO:1902475;GO:0065003;GO:0006520;GO:0006865;GO:0000821;GO:0055085;GO:1990822;GO:0050900;GO:0000821;GO:0006865;GO:1902475;GO:0065003;GO:0006520;GO:0006865;GO:0000821;GO:0055085;GO:0055085;GO:1990822;GO:0050900;GO:0006865;GO:1902475;GO:0065003;GO:0006520;GO:…	transmembrane transport;basic amino acid transmembrane transport;leukocyte migration;amino acid transport;L-alpha-amino acid transmembrane transport;macromolecular complex assembly;cellular amino acid metabolic process;amino acid transport;regulation of arginine metabolic process;transmembrane transport;basic amino acid transmembrane transport;leukocyte migration;amino acid transport;L-alpha-amin…	GO:0022857;GO:0015297;GO:0015179;GO:0015174;GO:0022857;GO:0015297;GO:0015179;GO:0015174;GO:0022857;GO:0015174;GO:0015297;GO:0015179;GO:0015174;GO:0022857;GO:0022857;GO:0015297;GO:0015179;GO:0015174;GO:0022857;GO:0015297;GO:0015179;GO:0015174;GO:0022857;GO:0022857;GO:0022857;GO:0022857;GO:0022857;GO:0022857;GO:0022857;GO:0022857	transmembrane transporter activity;antiporter activity;L-amino acid transmembrane transporter activity;basic amino acid transmembrane transporter activity;transmembrane transporter activity;antiporter activity;L-amino acid transmembrane transporter activity;basic amino acid transmembrane transporter activity;transmembrane transporter activity;basic amino acid transmembrane transporter activity;an…	GO:0016020;GO:0016021;GO:0005886;GO:0005886;GO:0016323;GO:0005887;GO:0016020;GO:0016021;GO:0005886;GO:0005886;GO:0016323;GO:0005887;GO:0016020;GO:0016021;GO:0005886;GO:0005886;GO:0016323;GO:0005887;GO:0016020;GO:0016021;GO:0016020;GO:0016021;GO:0005886;GO:0005886;GO:0016323;GO:0005887;GO:0016020;GO:0016021;GO:0005886;GO:0005886;GO:0016323;GO:0005887;GO:0016020;GO:0016021;GO:0016020;GO:0016021;GO:…	membrane;integral component of membrane;plasma membrane;plasma membrane;basolateral plasma membrane;integral component of plasma membrane;membrane;integral component of membrane;plasma membrane;plasma membrane;basolateral plasma membrane;integral component of plasma membrane;membrane;integral component of membrane;plasma membrane;plasma membrane;basolateral plasma membrane;integral component of p…
PSG9	0.136882	-2.869	1.37244e-11	7.68135e-10	PSG9	GO:0007565;GO:0007565	female pregnancy;female pregnancy	NA	NA	GO:0005576;GO:0005576	extracellular region;extracellular region
CD1D	2.94854	1.56	1.48381e-11	8.24362e-10	CD1D	GO:0002376;GO:0045087;GO:0050776;GO:0016032;GO:0045089;GO:0016045;GO:0042102;GO:0045058;GO:0048007;GO:0034113;GO:0048006	immune system process;innate immune response;regulation of immune response;viral process;positive regulation of innate immune response;detection of bacterium;positive regulation of T cell proliferation;T cell selection;antigen processing and presentation, exogenous lipid antigen via MHC class Ib;heterotypic cell-cell adhesion;antigen processing and presentation, endogenous lipid antigen via MHC c…	GO:0042393;GO:0030881;GO:0050839;GO:0030883;GO:0071723;GO:0030882;GO:0030884	histone binding;beta-2-microglobulin binding;cell adhesion molecule binding;endogenous lipid antigen binding;lipopeptide binding;lipid antigen binding;exogenous lipid antigen binding	GO:0016020;GO:0016021;GO:0005783;GO:0005765;GO:0005783;GO:0005789;GO:0005886;GO:0005764;GO:0005886;GO:0005887;GO:0005737;GO:0005768;GO:0016323;GO:0010008;GO:0009986	membrane;integral component of membrane;endoplasmic reticulum;lysosomal membrane;endoplasmic reticulum;endoplasmic reticulum membrane;plasma membrane;lysosome;plasma membrane;integral component of plasma membrane;cytoplasm;endosome;basolateral plasma membrane;endosome membrane;cell surface
SLC16A2	0.55594	-0.847	1.61572e-11	8.93725e-10	SLC16A2	GO:0055085;GO:0070327;GO:0015718;GO:0043252;GO:0070327;GO:0070327;GO:0055085;GO:0070327	transmembrane transport;thyroid hormone transport;monocarboxylic acid transport;sodium-independent organic anion transport;thyroid hormone transport;thyroid hormone transport;transmembrane transport;thyroid hormone transport	GO:0015349;GO:0015293;GO:0005215;GO:0008028;GO:0015349;GO:0015349;GO:0015349;GO:0015349	thyroid hormone transmembrane transporter activity;symporter activity;transporter activity;monocarboxylic acid transmembrane transporter activity;thyroid hormone transmembrane transporter activity;thyroid hormone transmembrane transporter activity;thyroid hormone transmembrane transporter activity;thyroid hormone transmembrane transporter activity	GO:0016021;GO:0005887;GO:0016020;GO:0005886;GO:0005886;GO:0005886;GO:0005887;GO:0016020;GO:0016021;GO:0005887;GO:0016021;GO:0005887;GO:0016020	integral component of membrane;integral component of plasma membrane;membrane;plasma membrane;plasma membrane;plasma membrane;integral component of plasma membrane;membrane;integral component of membrane;integral component of plasma membrane;integral component of membrane;integral component of plasma membrane;membrane
FOXO1	3.19098	1.674	2.04473e-11	1.12611e-09	FOXO1	GO:0006355;GO:0006351;GO:0006974;GO:0006915;GO:0006914;GO:0000122;GO:0030154;GO:0045893;GO:0045944;GO:0045444;GO:0010508;GO:0009267;GO:0009267;GO:0043065;GO:0009653;GO:0030154;GO:0034599;GO:0043066;GO:0045892;GO:0045599;GO:0019221;GO:0008286;GO:0001678;GO:0032869;GO:2000505;GO:0043491;GO:0006473;GO:0031018;GO:0045732;GO:0001659;GO:0071455;GO:1903243;GO:0032873;GO:0071732;GO:0001568;GO:0006357;GO:…	regulation of transcription, DNA-templated;transcription, DNA-templated;cellular response to DNA damage stimulus;apoptotic process;autophagy;negative regulation of transcription from RNA polymerase II promoter;cell differentiation;positive regulation of transcription, DNA-templated;positive regulation of transcription from RNA polymerase II promoter;fat cell differentiation;positive regulation of…	GO:0003700;GO:0043565;GO:0003677;GO:0005515;GO:0043565;GO:0000981;GO:0003682;GO:0000981;GO:0031625;GO:0008013;GO:0051721;GO:0000989;GO:0001078;GO:0001223;GO:0001227;GO:0008134;GO:0051721	DNA binding transcription factor activity;sequence-specific DNA binding;DNA binding;protein binding;sequence-specific DNA binding;RNA polymerase II transcription factor activity, sequence-specific DNA binding;chromatin binding;RNA polymerase II transcription factor activity, sequence-specific DNA binding;ubiquitin protein ligase binding;beta-catenin binding;protein phosphatase 2A binding;transcri…	GO:0005634;GO:0005634;GO:0005737;GO:0005737;GO:0005829;GO:0005739;GO:0005654;GO:0005829;GO:0005829	nucleus;nucleus;cytoplasm;cytoplasm;cytosol;mitochondrion;nucleoplasm;cytosol;cytosol
KIF13A	0.541488	-0.885	2.13337e-11	1.16985e-09	KIF13A	GO:0007018;GO:0072383;GO:0015031;GO:0051301;GO:0007049;GO:0006886;GO:0008333;GO:0030705;GO:0007018;GO:0032438;GO:0035459;GO:0032465;GO:0043001;GO:0072383;GO:0007018;GO:0072383;GO:0007018;GO:0072383;GO:0015031;GO:0051301;GO:0007049;GO:0006886;GO:0008333;GO:0030705;GO:0007018;GO:0032438;GO:0035459;GO:0032465;GO:0043001;GO:0072383;GO:0007018;GO:0072383;GO:0015031;GO:0051301;GO:0007049;GO:0006886;GO:…	microtubule-based movement;plus-end-directed vesicle transport along microtubule;protein transport;cell division;cell cycle;intracellular protein transport;endosome to lysosome transport;cytoskeleton-dependent intracellular transport;microtubule-based movement;melanosome organization;cargo loading into vesicle;regulation of cytokinesis;Golgi to plasma membrane protein transport;plus-end-directed …	GO:0005524;GO:0005515;GO:0008017;GO:0003777;GO:0000166;GO:0005515;GO:0016887;GO:0003777;GO:0003777;GO:0003777;GO:0005524;GO:0005515;GO:0008017;GO:0003777;GO:0000166;GO:0005515;GO:0016887;GO:0003777;GO:0003777;GO:0005524;GO:0005515;GO:0008017;GO:0003777;GO:0000166;GO:0005515;GO:0016887;GO:0003777;GO:0003777;GO:0005524;GO:0005515;GO:0008017;GO:0003777;GO:0000166;GO:0005515;GO:0016887;GO:0003777;GO:…	ATP binding;protein binding;microtubule binding;microtubule motor activity;nucleotide binding;protein binding;ATPase activity;microtubule motor activity;microtubule motor activity;microtubule motor activity;ATP binding;protein binding;microtubule binding;microtubule motor activity;nucleotide binding;protein binding;ATPase activity;microtubule motor activity;microtubule motor activity;ATP binding;…	GO:0005737;GO:0016020;GO:0005794;GO:0005856;GO:0000139;GO:0005874;GO:0005813;GO:0005815;GO:0030496;GO:0030496;GO:0005768;GO:0010008;GO:0010008;GO:0005871;GO:0032588;GO:0005622;GO:0005623;GO:0005737;GO:0016020;GO:0005794;GO:0005856;GO:0000139;GO:0005874;GO:0005813;GO:0005815;GO:0030496;GO:0030496;GO:0005768;GO:0010008;GO:0010008;GO:0005871;GO:0032588;GO:0005737;GO:0016020;GO:0005794;GO:0005856;GO:…	cytoplasm;membrane;Golgi apparatus;cytoskeleton;Golgi membrane;microtubule;centrosome;microtubule organizing center;midbody;midbody;endosome;endosome membrane;endosome membrane;kinesin complex;trans-Golgi network membrane;intracellular;cell;cytoplasm;membrane;Golgi apparatus;cytoskeleton;Golgi membrane;microtubule;centrosome;microtubule organizing center;midbody;midbody;endosome;endosome membrane…
FAM46B	3.16236	1.661	2.49932e-11	1.36461e-09	FAM46B	NA	NA	GO:0016740;GO:0005515;GO:0016779	transferase activity;protein binding;nucleotidyltransferase activity	NA	NA
NPAS3	0.363745	-1.459	3.4604e-11	1.8732e-09	NPAS3	GO:0006355;GO:0006351;GO:0006355;GO:0006351;GO:0006355;GO:0006351;GO:0045893;GO:0006357;GO:0032502;GO:0006355;GO:0006351;GO:0045893;GO:0006357;GO:0032502;GO:0006355;GO:0006351;GO:0045893;GO:0006357;GO:0032502;GO:0006355;GO:0006351;GO:0045893;GO:0006357;GO:0032502;GO:0006355;GO:0006351;GO:0045893;GO:0006357;GO:0032502;GO:0006355	regulation of transcription, DNA-templated;transcription, DNA-templated;regulation of transcription, DNA-templated;transcription, DNA-templated;regulation of transcription, DNA-templated;transcription, DNA-templated;positive regulation of transcription, DNA-templated;regulation of transcription from RNA polymerase II promoter;developmental process;regulation of transcription, DNA-templated;transc…	GO:0005515;GO:0046983;GO:0005515;GO:0046983;GO:0005515;GO:0046983;GO:0003677;GO:0000981;GO:0000981;GO:0005515;GO:0046983;GO:0003677;GO:0000981;GO:0000981;GO:0005515;GO:0046983;GO:0003677;GO:0000981;GO:0000981;GO:0005515;GO:0046983;GO:0003677;GO:0000981;GO:0000981;GO:0046983;GO:0003677;GO:0000981;GO:0000981	protein binding;protein dimerization activity;protein binding;protein dimerization activity;protein binding;protein dimerization activity;DNA binding;RNA polymerase II transcription factor activity, sequence-specific DNA binding;RNA polymerase II transcription factor activity, sequence-specific DNA binding;protein binding;protein dimerization activity;DNA binding;RNA polymerase II transcription f…	GO:0005634;GO:0005829;GO:0005654;GO:0005634;GO:0005829;GO:0005654;GO:0005634;GO:0005829;GO:0005654;GO:0005634;GO:0005634;GO:0005829;GO:0005654;GO:0005634;GO:0005634;GO:0005829;GO:0005654;GO:0005634;GO:0005634;GO:0005829;GO:0005654;GO:0005634;GO:0005634;GO:0005829;GO:0005654;GO:0005634	nucleus;cytosol;nucleoplasm;nucleus;cytosol;nucleoplasm;nucleus;cytosol;nucleoplasm;nucleus;nucleus;cytosol;nucleoplasm;nucleus;nucleus;cytosol;nucleoplasm;nucleus;nucleus;cytosol;nucleoplasm;nucleus;nucleus;cytosol;nucleoplasm;nucleus
SLC4A8	0.270931	-1.884	3.44621e-11	1.8732e-09	SLC4A8	GO:0006820;GO:0015698;GO:0006811;GO:0006814;GO:0055085;GO:0098656;GO:0051453;GO:0015701;GO:0006820;GO:0015698;GO:0006811;GO:0006814;GO:0055085;GO:0098656;GO:0051453;GO:0015701;GO:0006820;GO:0015698;GO:0006811;GO:0006814;GO:0055085;GO:0098656;GO:0051453;GO:0015701;GO:0006820;GO:0015698;GO:0006811;GO:0006814;GO:0055085;GO:0098656;GO:0051453;GO:0015701	anion transport;inorganic anion transport;ion transport;sodium ion transport;transmembrane transport;anion transmembrane transport;regulation of intracellular pH;bicarbonate transport;anion transport;inorganic anion transport;ion transport;sodium ion transport;transmembrane transport;anion transmembrane transport;regulation of intracellular pH;bicarbonate transport;anion transport;inorganic anion…	GO:0005452;GO:0008509;GO:0015297;GO:0005452;GO:0008510;GO:0015301;GO:0005452;GO:0008509;GO:0015297;GO:0005452;GO:0008510;GO:0015301;GO:0005452;GO:0008509;GO:0015297;GO:0005452;GO:0008510;GO:0015301;GO:0005452;GO:0008509;GO:0015297;GO:0005452;GO:0008510;GO:0015301	inorganic anion exchanger activity;anion transmembrane transporter activity;antiporter activity;inorganic anion exchanger activity;sodium:bicarbonate symporter activity;anion:anion antiporter activity;inorganic anion exchanger activity;anion transmembrane transporter activity;antiporter activity;inorganic anion exchanger activity;sodium:bicarbonate symporter activity;anion:anion antiporter activi…	GO:0016021;GO:0016020;GO:0005886;GO:0005887;GO:0016021;GO:0016020;GO:0005886;GO:0005887;GO:0005886;GO:0032809;GO:0043005;GO:0016021;GO:0016020;GO:0005886;GO:0005887;GO:0016021;GO:0016020;GO:0005886;GO:0005887	integral component of membrane;membrane;plasma membrane;integral component of plasma membrane;integral component of membrane;membrane;plasma membrane;integral component of plasma membrane;plasma membrane;neuronal cell body membrane;neuron projection;integral component of membrane;membrane;plasma membrane;integral component of plasma membrane;integral component of membrane;membrane;plasma membrane…
CX3CL1	0.155286	-2.687	3.69159e-11	1.98984e-09	CX3CL1	GO:0006955;GO:0019221;GO:0050902;GO:0060326;GO:0007155;GO:0010469;GO:0006955;GO:0006935;GO:0006935;GO:0006935;GO:0006952;GO:0007186;GO:0002548;GO:0030593;GO:0043547;GO:0048247;GO:0070098;GO:0070374;GO:0071346;GO:0071347;GO:0071356;GO:0030336;GO:0030593;GO:0032914;GO:0042060;GO:0045766;GO:0048246;GO:0048247;GO:0060055;GO:2001240;GO:0007186;GO:0050729;GO:0033622;GO:0019221;GO:0010976;GO:0030595;GO:…	immune response;cytokine-mediated signaling pathway;leukocyte adhesive activation;cell chemotaxis;cell adhesion;regulation of receptor activity;immune response;chemotaxis;chemotaxis;chemotaxis;defense response;G-protein coupled receptor signaling pathway;monocyte chemotaxis;neutrophil chemotaxis;positive regulation of GTPase activity;lymphocyte chemotaxis;chemokine-mediated signaling pathway;posi…	GO:0008009;GO:0005515;GO:0005125;GO:0048020;GO:0005102;GO:0008009;GO:0008009;GO:0005178;GO:0031737;GO:0008009;GO:0008009	chemokine activity;protein binding;cytokine activity;CCR chemokine receptor binding;receptor binding;chemokine activity;chemokine activity;integrin binding;CX3C chemokine receptor binding;chemokine activity;chemokine activity	GO:0016021;GO:0005576;GO:0016020;GO:0016021;GO:0005886;GO:0005576;GO:0005615;GO:0005615;GO:0005576;GO:0009986;GO:0009986;GO:0016021;GO:0005576;GO:0016020;GO:0016021;GO:0005576;GO:0016020	integral component of membrane;extracellular region;membrane;integral component of membrane;plasma membrane;extracellular region;extracellular space;extracellular space;extracellular region;cell surface;cell surface;integral component of membrane;extracellular region;membrane;integral component of membrane;extracellular region;membrane
ATG16L2	2.1795	1.124	4.09795e-11	2.19952e-09	ATG16L2	GO:0015031;GO:0006914;GO:0000045;GO:0039689;GO:0039689	protein transport;autophagy;autophagosome assembly;negative stranded viral RNA replication;negative stranded viral RNA replication	GO:0005515;GO:0005515;GO:0005515;GO:0005515;GO:0005515;GO:0005515	protein binding;protein binding;protein binding;protein binding;protein binding;protein binding	GO:0005737;GO:0005654;GO:0000421;GO:0005654;GO:0005654;GO:0005654;GO:0005654	cytoplasm;nucleoplasm;autophagosome membrane;nucleoplasm;nucleoplasm;nucleoplasm;nucleoplasm
SUGCT	2.81279	1.492	4.56861e-11	2.4418e-09	SUGCT	GO:0008152;GO:0008152;GO:0008152;GO:0008152;GO:0008152	metabolic process;metabolic process;metabolic process;metabolic process;metabolic process	GO:0003824;GO:0033608;GO:0016740;GO:0047369;GO:0047369;GO:0003824;GO:0033608;GO:0016740;GO:0047369;GO:0047369;GO:0003824;GO:0033608;GO:0016740;GO:0047369;GO:0047369;GO:0003824;GO:0033608;GO:0003824;GO:0033608	catalytic activity;formyl-CoA transferase activity;transferase activity;succinate-hydroxymethylglutarate CoA-transferase activity;succinate-hydroxymethylglutarate CoA-transferase activity;catalytic activity;formyl-CoA transferase activity;transferase activity;succinate-hydroxymethylglutarate CoA-transferase activity;succinate-hydroxymethylglutarate CoA-transferase activity;catalytic activity;form…	GO:0005739;GO:0005739;GO:0005739;GO:0005739;GO:0005739;GO:0005739	mitochondrion;mitochondrion;mitochondrion;mitochondrion;mitochondrion;mitochondrion
ZMIZ1	0.536258	-0.899	5.06675e-11	2.69666e-09	ZMIZ1	GO:0006351;GO:0006355;GO:0045944;GO:0045747;GO:0045582;GO:0001570;GO:0001701;GO:0003007;GO:0007296;GO:0007569;GO:0045582;GO:0045747;GO:0045944;GO:0048146;GO:0048589;GO:0048844	transcription, DNA-templated;regulation of transcription, DNA-templated;positive regulation of transcription from RNA polymerase II promoter;positive regulation of Notch signaling pathway;positive regulation of T cell differentiation;vasculogenesis;in utero embryonic development;heart morphogenesis;vitellogenesis;cell aging;positive regulation of T cell differentiation;positive regulation of Notc…	GO:0008270;GO:0046872;GO:0008270	zinc ion binding;metal ion binding;zinc ion binding	GO:0005634;GO:0005737;GO:0016607;GO:0043231;GO:0005654;GO:0043231;GO:0005654	nucleus;cytoplasm;nuclear speck;intracellular membrane-bounded organelle;nucleoplasm;intracellular membrane-bounded organelle;nucleoplasm
CST3	1.82387	0.867	5.62105e-11	2.97915e-09	CST3	GO:0010951;GO:0010466;GO:0001654;GO:0001666;GO:0001775;GO:0006915;GO:0006979;GO:0007420;GO:0007431;GO:0007566;GO:0008284;GO:0008584;GO:0009636;GO:0009743;GO:0010035;GO:0014070;GO:0031667;GO:0032355;GO:0034599;GO:0042493;GO:0042747;GO:0043067;GO:0045740;GO:0048678;GO:0060009;GO:0060548;GO:0070301;GO:0044267;GO:0043687;GO:0043312;GO:0097435;GO:2000117;GO:0006952;GO:0010466;GO:0010711;GO:0010716;GO:…	negative regulation of endopeptidase activity;negative regulation of peptidase activity;eye development;response to hypoxia;cell activation;apoptotic process;response to oxidative stress;brain development;salivary gland development;embryo implantation;positive regulation of cell proliferation;male gonad development;response to toxic substance;response to carbohydrate;response to inorganic substan…	GO:0004869;GO:0004869;GO:0030414;GO:0042802;GO:0002020;GO:0005515;GO:0002020;GO:0001540;GO:0004866;GO:0004869;GO:0004869;GO:0030414;GO:0042802;GO:0005515;GO:0002020;GO:0001540;GO:0004866;GO:0004869;GO:0004869;GO:0030414;GO:0042802;GO:0005515;GO:0002020;GO:0001540;GO:0004866	cysteine-type endopeptidase inhibitor activity;cysteine-type endopeptidase inhibitor activity;peptidase inhibitor activity;identical protein binding;protease binding;protein binding;protease binding;amyloid-beta binding;endopeptidase inhibitor activity;cysteine-type endopeptidase inhibitor activity;cysteine-type endopeptidase inhibitor activity;peptidase inhibitor activity;identical protein bindi…	GO:0005576;GO:0005615;GO:0005615;GO:0005576;GO:0005604;GO:0005615;GO:0005737;GO:0005764;GO:0005771;GO:0005783;GO:0030424;GO:0031965;GO:0031982;GO:0042995;GO:0043025;GO:0043292;GO:0048471;GO:0070062;GO:1904813;GO:0005788;GO:1904724;GO:0005576;GO:0005576;GO:0005615;GO:0005615;GO:0005576;GO:0070062;GO:1904813;GO:0005788;GO:1904724;GO:0005576;GO:0005576;GO:0005615;GO:0005615;GO:0005576;GO:0070062;GO:…	extracellular region;extracellular space;extracellular space;extracellular region;basement membrane;extracellular space;cytoplasm;lysosome;multivesicular body;endoplasmic reticulum;axon;nuclear membrane;vesicle;cell projection;neuronal cell body;contractile fiber;perinuclear region of cytoplasm;extracellular exosome;ficolin-1-rich granule lumen;endoplasmic reticulum lumen;tertiary granule lumen;e…
ATOH8	2.09362	1.066	7.77686e-11	4.10456e-09	ATOH8	GO:0006355;GO:0030154;GO:0006351;GO:0007275;GO:0045893;GO:0006357;GO:0007399;GO:0045892;GO:0060395;GO:0001937;GO:0010595;GO:0035148;GO:0045603;GO:0045603;GO:0001704;GO:0001704;GO:0045892;GO:0051450;GO:0051450	regulation of transcription, DNA-templated;cell differentiation;transcription, DNA-templated;multicellular organism development;positive regulation of transcription, DNA-templated;regulation of transcription from RNA polymerase II promoter;nervous system development;negative regulation of transcription, DNA-templated;SMAD protein signal transduction;negative regulation of endothelial cell prolife…	GO:0003700;GO:0046983;GO:0003677;GO:0003700;GO:0000981;GO:0070888;GO:0008134;GO:0033613	DNA binding transcription factor activity;protein dimerization activity;DNA binding;DNA binding transcription factor activity;RNA polymerase II transcription factor activity, sequence-specific DNA binding;E-box binding;transcription factor binding;activating transcription factor binding	GO:0005634;GO:0005634;GO:0005737;GO:0005737;GO:0016607;GO:0005654	nucleus;nucleus;cytoplasm;cytoplasm;nuclear speck;nucleoplasm
LTBP1	3.00216	1.586	9.00109e-11	4.73099e-09	LTBP1	GO:0044267;GO:0043687;GO:0035583;GO:0003281;GO:0007178;GO:0035904;GO:0060976;GO:0044267;GO:0043687;GO:0035583;GO:0007178;GO:0044267;GO:0043687;GO:0035583;GO:0007178	cellular protein metabolic process;post-translational protein modification;sequestering of TGFbeta in extracellular matrix;ventricular septum development;transmembrane receptor protein serine/threonine kinase signaling pathway;aorta development;coronary vasculature development;cellular protein metabolic process;post-translational protein modification;sequestering of TGFbeta in extracellular matri…	GO:0005509;GO:0005515;GO:0019838;GO:0050431;GO:0005024;GO:0050436;GO:0005509;GO:0005509;GO:0005515;GO:0019838;GO:0050431;GO:0005024;GO:0050436;GO:0005509;GO:0005515;GO:0019838;GO:0050431;GO:0005024;GO:0050436;GO:0005509;GO:0005509;GO:0005509	calcium ion binding;protein binding;growth factor binding;transforming growth factor beta binding;transforming growth factor beta-activated receptor activity;microfibril binding;calcium ion binding;calcium ion binding;protein binding;growth factor binding;transforming growth factor beta binding;transforming growth factor beta-activated receptor activity;microfibril binding;calcium ion binding;pro…	GO:0005576;GO:0005578;GO:0005576;GO:0031012;GO:0031012;GO:0005788;GO:0005576;GO:0001527;GO:0005578;GO:0005615;GO:0032991;GO:0005576;GO:0005578;GO:0005576;GO:0031012;GO:0031012;GO:0005788;GO:0005576;GO:0001527;GO:0032991;GO:0005576;GO:0005578;GO:0005576;GO:0031012;GO:0031012;GO:0005788;GO:0005576;GO:0001527;GO:0032991	extracellular region;proteinaceous extracellular matrix;extracellular region;extracellular matrix;extracellular matrix;endoplasmic reticulum lumen;extracellular region;microfibril;proteinaceous extracellular matrix;extracellular space;macromolecular complex;extracellular region;proteinaceous extracellular matrix;extracellular region;extracellular matrix;extracellular matrix;endoplasmic reticulum …
NOV	0.261884	-1.933	9.16428e-11	4.79686e-09	NOV	GO:0001558;GO:0010469;GO:0002062;GO:0010468;GO:0044342;GO:0046676;GO:0048659;GO:0050728;GO:0060392;GO:1904057;GO:1990523;GO:0007267;GO:0050728;GO:0001525;GO:1990523;GO:0030308;GO:0045747;GO:0060326;GO:0060548;GO:0002062;GO:0042347;GO:0035767;GO:0033627;GO:0010832;GO:0046676;GO:0060392;GO:0071603;GO:0010761;GO:0014909;GO:0044342;GO:0048659;GO:0061484;GO:0090027;GO:1902731;GO:1904057	regulation of cell growth;regulation of receptor activity;chondrocyte differentiation;regulation of gene expression;type B pancreatic cell proliferation;negative regulation of insulin secretion;smooth muscle cell proliferation;negative regulation of inflammatory response;negative regulation of SMAD protein import into nucleus;negative regulation of sensory perception of pain;bone regeneration;cel…	GO:0005515;GO:0005520;GO:0008083;GO:0005515;GO:0005178;GO:0005112;GO:0008201	protein binding;insulin-like growth factor binding;growth factor activity;protein binding;integrin binding;Notch binding;heparin binding	GO:0005576;GO:0005737;GO:0005737;GO:0005737;GO:0043231;GO:0005576;GO:0005921;GO:0005921;GO:0005921;GO:0030054;GO:0005615;GO:0030424;GO:0030425;GO:0031012;GO:0043025;GO:0005578	extracellular region;cytoplasm;cytoplasm;cytoplasm;intracellular membrane-bounded organelle;extracellular region;gap junction;gap junction;gap junction;cell junction;extracellular space;axon;dendrite;extracellular matrix;neuronal cell body;proteinaceous extracellular matrix
PDE5A	0.459775	-1.121	9.41702e-11	4.90887e-09	PDE5A	GO:0007165;GO:0008152;GO:0046069;GO:0046069;GO:0010613;GO:0030823;GO:0042130;GO:0043406;GO:0046068;GO:0055118;GO:0055119;GO:0060282;GO:0007165;GO:0008152;GO:0046069;GO:0046069;GO:0007165;GO:0007165	signal transduction;metabolic process;cGMP catabolic process;cGMP catabolic process;positive regulation of cardiac muscle hypertrophy;regulation of cGMP metabolic process;negative regulation of T cell proliferation;positive regulation of MAP kinase activity;cGMP metabolic process;negative regulation of cardiac muscle contraction;relaxation of cardiac muscle;positive regulation of oocyte developme…	GO:0005515;GO:0004114;GO:0008081;GO:0046872;GO:0000166;GO:0016787;GO:0005515;GO:0003824;GO:0030553;GO:0030553;GO:0004114;GO:0047555;GO:0004112;GO:0047555;GO:0005515;GO:0004114;GO:0008081;GO:0046872;GO:0000166;GO:0016787;GO:0005515;GO:0003824;GO:0030553;GO:0030553;GO:0004114;GO:0047555;GO:0047555;GO:0004114;GO:0008081;GO:0046872;GO:0016787;GO:0005515;GO:0005515;GO:0004114;GO:0008081;GO:0046872;GO:…	protein binding;3',5'-cyclic-nucleotide phosphodiesterase activity;phosphoric diester hydrolase activity;metal ion binding;nucleotide binding;hydrolase activity;protein binding;catalytic activity;cGMP binding;cGMP binding;3',5'-cyclic-nucleotide phosphodiesterase activity;3',5'-cyclic-GMP phosphodiesterase activity;cyclic-nucleotide phosphodiesterase activity;3',5'-cyclic-GMP phosphodiesterase ac…	GO:0005829;GO:0005575;GO:0005829;GO:0005575	cytosol;cellular_component;cytosol;cellular_component
TSPAN7	0.517632	-0.95	9.88952e-11	5.13404e-09	TSPAN7	GO:0007166;GO:0016032	cell surface receptor signaling pathway;viral process	NA	NA	GO:0016021;GO:0016020;GO:0005887;GO:0016020;GO:0016021;GO:0016020;GO:0016021;GO:0016020;GO:0016021;GO:0016021;GO:0016020	integral component of membrane;membrane;integral component of plasma membrane;membrane;integral component of membrane;membrane;integral component of membrane;membrane;integral component of membrane;integral component of membrane;membrane
ADRA1D	0.346037	-1.531	1.22876e-10	6.35294e-09	ADRA1D	GO:0007186;GO:0007165;GO:0071875;GO:0007186;GO:0006259;GO:0007267;GO:0007275;GO:0008283;GO:0007188;GO:0007200;GO:0008284;GO:0007204;GO:0071880;GO:0045987;GO:0045907;GO:0001994	G-protein coupled receptor signaling pathway;signal transduction;adrenergic receptor signaling pathway;G-protein coupled receptor signaling pathway;DNA metabolic process;cell-cell signaling;multicellular organism development;cell proliferation;adenylate cyclase-modulating G-protein coupled receptor signaling pathway;phospholipase C-activating G-protein coupled receptor signaling pathway;positive …	GO:0004930;GO:0004937;GO:0004935;GO:0004871;GO:0005515;GO:0004937;GO:0004937	G-protein coupled receptor activity;alpha1-adrenergic receptor activity;adrenergic receptor activity;signal transducer activity;protein binding;alpha1-adrenergic receptor activity;alpha1-adrenergic receptor activity	GO:0016021;GO:0016020;GO:0005622;GO:0005886;GO:0005886;GO:0005887	integral component of membrane;membrane;intracellular;plasma membrane;plasma membrane;integral component of plasma membrane
RDH10	0.462011	-1.114	1.28589e-10	6.62129e-09	RDH10	GO:0002138;GO:0055114;GO:0001656;GO:0001701;GO:0008406;GO:0009887;GO:0014032;GO:0031076;GO:0035115;GO:0042572;GO:0042574;GO:0043583;GO:0043584;GO:0048568;GO:0048703;GO:0060431;GO:0060449;GO:0001523;GO:0042572;GO:0042574;GO:0007601;GO:0002138;GO:0055114;GO:0042572;GO:0002138;GO:0055114;GO:0042572	retinoic acid biosynthetic process;oxidation-reduction process;metanephros development;in utero embryonic development;gonad development;animal organ morphogenesis;neural crest cell development;embryonic camera-type eye development;embryonic forelimb morphogenesis;retinol metabolic process;retinal metabolic process;ear development;nose development;embryonic organ development;embryonic viscerocrani…	GO:0016491;GO:0052650;GO:0004745;GO:0004745;GO:0004745;GO:0052650;GO:0016491;GO:0052650;GO:0016491;GO:0052650	oxidoreductase activity;NADP-retinol dehydrogenase activity;retinol dehydrogenase activity;retinol dehydrogenase activity;retinol dehydrogenase activity;NADP-retinol dehydrogenase activity;oxidoreductase activity;NADP-retinol dehydrogenase activity;oxidoreductase activity;NADP-retinol dehydrogenase activity	GO:0005737;GO:0016020;GO:0016021;GO:0016021;GO:0005783;GO:0005789;GO:0044297;GO:0005789;GO:0043231;GO:0031090	cytoplasm;membrane;integral component of membrane;integral component of membrane;endoplasmic reticulum;endoplasmic reticulum membrane;cell body;endoplasmic reticulum membrane;intracellular membrane-bounded organelle;organelle membrane
BCL6	2.24233	1.165	1.3411e-10	6.86804e-09	BCL6	GO:0006351;GO:0006355;GO:0006974;GO:0006954;GO:0002376;GO:0000122;GO:0043065;GO:0030308;GO:0042127;GO:0042981;GO:0045892;GO:0045892;GO:0019221;GO:0045591;GO:0050727;GO:0000060;GO:0042092;GO:0050776;GO:0000122;GO:0000902;GO:0001953;GO:0002467;GO:0002634;GO:0002829;GO:0002903;GO:0006357;GO:0007266;GO:0007283;GO:0008104;GO:0008285;GO:0030036;GO:0030183;GO:0030890;GO:0031065;GO:0032764;GO:0035024;GO:…	transcription, DNA-templated;regulation of transcription, DNA-templated;cellular response to DNA damage stimulus;inflammatory response;immune system process;negative regulation of transcription from RNA polymerase II promoter;positive regulation of apoptotic process;negative regulation of cell growth;regulation of cell proliferation;regulation of apoptotic process;negative regulation of transcrip…	GO:0005515;GO:0003676;GO:0046872;GO:0003677;GO:0003700;GO:0005515;GO:0043565;GO:0042802;GO:0000981;GO:0003682;GO:0000977;GO:0001161;GO:0001227;GO:0003682;GO:0031490;GO:0043565;GO:0005515;GO:0003676;GO:0046872;GO:0003677;GO:0003700;GO:0005515;GO:0043565;GO:0042802;GO:0000981;GO:0003682;GO:0005515;GO:0003676;GO:0046872;GO:0003677;GO:0003700;GO:0005515;GO:0043565;GO:0042802;GO:0000981;GO:0003682;GO:…	protein binding;nucleic acid binding;metal ion binding;DNA binding;DNA binding transcription factor activity;protein binding;sequence-specific DNA binding;identical protein binding;RNA polymerase II transcription factor activity, sequence-specific DNA binding;chromatin binding;RNA polymerase II regulatory region sequence-specific DNA binding;intronic transcription regulatory region sequence-speci…	GO:0005634;GO:0005634;GO:0005794;GO:0005654;GO:0005654;GO:0005657;GO:0005634;GO:0005634;GO:0005794;GO:0005654;GO:0005654;GO:0005657;GO:0005634;GO:0005634;GO:0005794;GO:0005654;GO:0005654;GO:0005657;GO:0005634;GO:0005634;GO:0005794;GO:0005654;GO:0005654;GO:0005657	nucleus;nucleus;Golgi apparatus;nucleoplasm;nucleoplasm;replication fork;nucleus;nucleus;Golgi apparatus;nucleoplasm;nucleoplasm;replication fork;nucleus;nucleus;Golgi apparatus;nucleoplasm;nucleoplasm;replication fork;nucleus;nucleus;Golgi apparatus;nucleoplasm;nucleoplasm;replication fork
ATP10A	2.10089	1.071	1.34465e-10	6.86804e-09	ATP10A	GO:0015914;GO:0006869;GO:0034220;GO:0008360;GO:0045332;GO:0015914;GO:0045332;GO:0015914;GO:0045332;GO:0006869;GO:0015914;GO:0034220;GO:0008360;GO:0045332;GO:0015914;GO:0006869;GO:0034220;GO:0008360;GO:0045332	phospholipid transport;lipid transport;ion transmembrane transport;regulation of cell shape;phospholipid translocation;phospholipid transport;phospholipid translocation;phospholipid transport;phospholipid translocation;lipid transport;phospholipid transport;ion transmembrane transport;regulation of cell shape;phospholipid translocation;phospholipid transport;lipid transport;ion transmembrane tran…	GO:0005524;GO:0000287;GO:0000166;GO:0004012;GO:0046872;GO:0016787;GO:0004012;GO:0005515;GO:0004012;GO:0004012;GO:0000166;GO:0005524;GO:0000287;GO:0016787;GO:0004012;GO:0005524;GO:0000287;GO:0004012;GO:0046872;GO:0000166;GO:0005524;GO:0000287;GO:0016787;GO:0004012;GO:0004012;GO:0005515;GO:0004012;GO:0004012;GO:0005524;GO:0000287;GO:0004012;GO:0046872;GO:0000166;GO:0016787;GO:0004012;GO:0005515;GO:…	ATP binding;magnesium ion binding;nucleotide binding;phospholipid-translocating ATPase activity;metal ion binding;hydrolase activity;phospholipid-translocating ATPase activity;protein binding;phospholipid-translocating ATPase activity;phospholipid-translocating ATPase activity;nucleotide binding;ATP binding;magnesium ion binding;hydrolase activity;phospholipid-translocating ATPase activity;ATP bi…	GO:0016021;GO:0016020;GO:0016021;GO:0005783;GO:0005783;GO:0005789;GO:0005886;GO:0005886;GO:0005886;GO:0016020;GO:0016021;GO:0016021;GO:0016020;GO:0016020;GO:0016021;GO:0016021;GO:0005783;GO:0005783;GO:0005789;GO:0005886;GO:0005886;GO:0005886;GO:0016021;GO:0016020;GO:0016021;GO:0005783;GO:0005783;GO:0005789;GO:0005886;GO:0005886;GO:0005886	integral component of membrane;membrane;integral component of membrane;endoplasmic reticulum;endoplasmic reticulum;endoplasmic reticulum membrane;plasma membrane;plasma membrane;plasma membrane;membrane;integral component of membrane;integral component of membrane;membrane;membrane;integral component of membrane;integral component of membrane;endoplasmic reticulum;endoplasmic reticulum;endoplasmi…
IER5L	0.456916	-1.13	1.36326e-10	6.93513e-09	IER5L	NA	NA	GO:0005515	protein binding	NA	NA
LPXN	0.436181	-1.197	1.37051e-10	6.94412e-09	LPXN	GO:0007155;GO:1903506;GO:0007155;GO:0006351;GO:0006355;GO:0007165;GO:0007155;GO:0065003;GO:0007162;GO:0050859;GO:0007155;GO:0006351;GO:0006355;GO:0007165;GO:0007155;GO:0065003;GO:0007162;GO:0033628;GO:0050859;GO:0050859;GO:0007155;GO:1903506	cell adhesion;regulation of nucleic acid-templated transcription;cell adhesion;transcription, DNA-templated;regulation of transcription, DNA-templated;signal transduction;cell adhesion;macromolecular complex assembly;negative regulation of cell adhesion;negative regulation of B cell receptor signaling pathway;cell adhesion;transcription, DNA-templated;regulation of transcription, DNA-templated;si…	GO:0003712;GO:0003712;GO:0046872;GO:0005515;GO:0003712;GO:0003712;GO:0046872;GO:0005515;GO:0003712;GO:0003712;GO:0046872	transcription cofactor activity;transcription cofactor activity;metal ion binding;protein binding;transcription cofactor activity;transcription cofactor activity;metal ion binding;protein binding;transcription cofactor activity;transcription cofactor activity;metal ion binding	GO:0005925;GO:0002102;GO:0005925;GO:0002102;GO:0005634;GO:0005634;GO:0005737;GO:0005737;GO:0016607;GO:0016020;GO:0016020;GO:0005829;GO:0005925;GO:0005886;GO:0005886;GO:0042995;GO:0048471;GO:0030054;GO:0002102;GO:0005925;GO:0002102;GO:0005634;GO:0005634;GO:0005737;GO:0005737;GO:0016607;GO:0016020;GO:0016020;GO:0005829;GO:0005925;GO:0005886;GO:0005886;GO:0042995;GO:0048471;GO:0030054;GO:0002102;GO:…	focal adhesion;podosome;focal adhesion;podosome;nucleus;nucleus;cytoplasm;cytoplasm;nuclear speck;membrane;membrane;cytosol;focal adhesion;plasma membrane;plasma membrane;cell projection;perinuclear region of cytoplasm;cell junction;podosome;focal adhesion;podosome;nucleus;nucleus;cytoplasm;cytoplasm;nuclear speck;membrane;membrane;cytosol;focal adhesion;plasma membrane;plasma membrane;cell proje…
TMEM132B	0.29179	-1.777	1.47011e-10	7.41905e-09	TMEM132B	GO:0008150;GO:0008150	biological_process;biological_process	GO:0003674;GO:0003674	molecular_function;molecular_function	GO:0016020;GO:0016021;GO:0016021;GO:0005575;GO:0016020;GO:0016021;GO:0016021;GO:0005575	membrane;integral component of membrane;integral component of membrane;cellular_component;membrane;integral component of membrane;integral component of membrane;cellular_component
RAPGEF3	2.72452	1.446	1.48442e-10	7.46154e-09	RAPGEF3	GO:0007264;GO:0035556;GO:0043547;GO:0033138;GO:0001525;GO:0007165;GO:1901985;GO:0061028;GO:0071320;GO:0008283;GO:0050796;GO:0045766;GO:0051496;GO:2000249;GO:0019933;GO:0030822;GO:0032486;GO:0034242;GO:0046827;GO:0060143;GO:0007264;GO:0035556;GO:0043547;GO:0033138;GO:0001525;GO:0007165;GO:1901985;GO:0061028;GO:0071320;GO:0008283;GO:0050796;GO:0045766;GO:0051496;GO:2000249;GO:0019933;GO:0030822;GO:…	small GTPase mediated signal transduction;intracellular signal transduction;positive regulation of GTPase activity;positive regulation of peptidyl-serine phosphorylation;angiogenesis;signal transduction;positive regulation of protein acetylation;establishment of endothelial barrier;cellular response to cAMP;cell proliferation;regulation of insulin secretion;positive regulation of angiogenesis;pos…	GO:0005085;GO:0000166;GO:0005515;GO:0030552;GO:0019904;GO:0005085;GO:0005085;GO:0017034;GO:0005085;GO:0000166;GO:0005515;GO:0030552;GO:0019904;GO:0005085;GO:0005085;GO:0017034;GO:0005085;GO:0000166;GO:0005515;GO:0030552;GO:0019904;GO:0005085;GO:0005085;GO:0017034;GO:0005085;GO:0005085;GO:0000166;GO:0005085;GO:0005515;GO:0030552;GO:0019904;GO:0005085;GO:0005085;GO:0017034;GO:0005085;GO:0000166;GO:…	guanyl-nucleotide exchange factor activity;nucleotide binding;protein binding;cAMP binding;protein domain specific binding;guanyl-nucleotide exchange factor activity;guanyl-nucleotide exchange factor activity;Rap guanyl-nucleotide exchange factor activity;guanyl-nucleotide exchange factor activity;nucleotide binding;protein binding;cAMP binding;protein domain specific binding;guanyl-nucleotide ex…	GO:0016020;GO:0005622;GO:0005886;GO:0005886;GO:0030027;GO:0030175;GO:0070062;GO:0012505;GO:0005902;GO:0016020;GO:0030864;GO:0016020;GO:0005622;GO:0005886;GO:0005886;GO:0030027;GO:0030175;GO:0070062;GO:0012505;GO:0005902;GO:0016020;GO:0030864;GO:0016020;GO:0005622;GO:0005886;GO:0005886;GO:0030027;GO:0030175;GO:0070062;GO:0012505;GO:0005902;GO:0016020;GO:0030864;GO:0005622;GO:0005622;GO:0016020;GO:…	membrane;intracellular;plasma membrane;plasma membrane;lamellipodium;filopodium;extracellular exosome;endomembrane system;microvillus;membrane;cortical actin cytoskeleton;membrane;intracellular;plasma membrane;plasma membrane;lamellipodium;filopodium;extracellular exosome;endomembrane system;microvillus;membrane;cortical actin cytoskeleton;membrane;intracellular;plasma membrane;plasma membrane;la…
AKNA	2.16745	1.116	1.49437e-10	7.48189e-09	AKNA	GO:0006366;GO:0006351;GO:0006355;GO:0045944;GO:0006366;GO:0006351;GO:0006355;GO:0045944;GO:0006366;GO:0006351;GO:0006355;GO:0045944;GO:0006366;GO:0006351;GO:0006355;GO:0045944;GO:0006366;GO:0006351;GO:0006355;GO:0045944;GO:0006366;GO:0006351;GO:0006355;GO:0045944	transcription from RNA polymerase II promoter;transcription, DNA-templated;regulation of transcription, DNA-templated;positive regulation of transcription from RNA polymerase II promoter;transcription from RNA polymerase II promoter;transcription, DNA-templated;regulation of transcription, DNA-templated;positive regulation of transcription from RNA polymerase II promoter;transcription from RNA po…	GO:0003677;GO:0005515;GO:0000978;GO:0000981;GO:0001077;GO:0003677;GO:0005515;GO:0000978;GO:0000981;GO:0001077;GO:0003677;GO:0005515;GO:0000978;GO:0000981;GO:0001077;GO:0003677;GO:0005515;GO:0000978;GO:0000981;GO:0001077;GO:0003677;GO:0005515;GO:0000978;GO:0000981;GO:0001077;GO:0003677;GO:0005515;GO:0000978;GO:0000981;GO:0001077	DNA binding;protein binding;RNA polymerase II proximal promoter sequence-specific DNA binding;RNA polymerase II transcription factor activity, sequence-specific DNA binding;transcriptional activator activity, RNA polymerase II proximal promoter sequence-specific DNA binding;DNA binding;protein binding;RNA polymerase II proximal promoter sequence-specific DNA binding;RNA polymerase II transcriptio…	GO:0005634;GO:0016020;GO:0043231;GO:0005813;GO:0005829;GO:0005654;GO:0001650;GO:0005634;GO:0016020;GO:0043231;GO:0005813;GO:0005829;GO:0005654;GO:0001650;GO:0005634;GO:0016020;GO:0043231;GO:0005813;GO:0005829;GO:0005654;GO:0001650;GO:0005634;GO:0016020;GO:0043231;GO:0005813;GO:0005829;GO:0005654;GO:0001650;GO:0005634;GO:0016020;GO:0043231;GO:0005813;GO:0005829;GO:0005654;GO:0001650;GO:0005634;GO:…	nucleus;membrane;intracellular membrane-bounded organelle;centrosome;cytosol;nucleoplasm;fibrillar center;nucleus;membrane;intracellular membrane-bounded organelle;centrosome;cytosol;nucleoplasm;fibrillar center;nucleus;membrane;intracellular membrane-bounded organelle;centrosome;cytosol;nucleoplasm;fibrillar center;nucleus;membrane;intracellular membrane-bounded organelle;centrosome;cytosol;nucl…
NFKBIA	1.76174	0.817	1.57921e-10	7.87551e-09	NFKBIA	GO:0038095;GO:0045944;GO:0045944;GO:0002223;GO:0016579;GO:0050852;GO:0070498;GO:0016032;GO:0042994;GO:0006915;GO:0043066;GO:0051092;GO:0007249;GO:0032270;GO:0010745;GO:0010875;GO:0010888;GO:0043392;GO:0042345;GO:0000060;GO:0007253;GO:0007253;GO:0010468;GO:0031663;GO:0032088;GO:0032495;GO:0032496;GO:0033209;GO:0034142;GO:0035994;GO:0042127;GO:0042994;GO:0043330;GO:0045638;GO:0045746;GO:0045893;GO:…	Fc-epsilon receptor signaling pathway;positive regulation of transcription from RNA polymerase II promoter;positive regulation of transcription from RNA polymerase II promoter;stimulatory C-type lectin receptor signaling pathway;protein deubiquitination;T cell receptor signaling pathway;interleukin-1-mediated signaling pathway;viral process;cytoplasmic sequestering of transcription factor;apoptot…	GO:0005515;GO:0005515;GO:0042802;GO:0031625;GO:0008134;GO:0019899;GO:0051059;GO:0008139;GO:0031072;GO:0051059;GO:0051059;GO:0005515;GO:0005515	protein binding;protein binding;identical protein binding;ubiquitin protein ligase binding;transcription factor binding;enzyme binding;NF-kappaB binding;nuclear localization sequence binding;heat shock protein binding;NF-kappaB binding;NF-kappaB binding;protein binding;protein binding	GO:0005634;GO:0005634;GO:0005737;GO:0005737;GO:0005829;GO:0005886;GO:0005829;GO:0005622;GO:0033256;GO:0005829;GO:0005829;GO:0005886	nucleus;nucleus;cytoplasm;cytoplasm;cytosol;plasma membrane;cytosol;intracellular;I-kappaB/NF-kappaB complex;cytosol;cytosol;plasma membrane
LMNTD1	10.3747	3.375	1.69419e-10	8.41582e-09	LMNTD1	GO:0008283	cell proliferation	GO:0005198;GO:0005198;GO:0005198;GO:0005198;GO:0005198;GO:0005198;GO:0005198;GO:0005198;GO:0005198;GO:0005198;GO:0005198	structural molecule activity;structural molecule activity;structural molecule activity;structural molecule activity;structural molecule activity;structural molecule activity;structural molecule activity;structural molecule activity;structural molecule activity;structural molecule activity;structural molecule activity	GO:0005882;GO:0005882;GO:0005882;GO:0005882;GO:0005634;GO:0005635;GO:0005737;GO:0005882;GO:0005882;GO:0005882;GO:0005882;GO:0005882;GO:0005882;GO:0005882	intermediate filament;intermediate filament;intermediate filament;intermediate filament;nucleus;nuclear envelope;cytoplasm;intermediate filament;intermediate filament;intermediate filament;intermediate filament;intermediate filament;intermediate filament;intermediate filament
DKK1	3.32188	1.732	1.72659e-10	8.54325e-09	DKK1	GO:0007275;GO:0030178;GO:0010469;GO:0016055;GO:2000726;GO:0090090;GO:0060394;GO:0090090;GO:0030178;GO:1900116;GO:0000122;GO:0000904;GO:0001706;GO:0001707;GO:0001942;GO:0007492;GO:0007611;GO:0010628;GO:0030111;GO:0030279;GO:0030326;GO:0030514;GO:0030900;GO:0032526;GO:0043066;GO:0048642;GO:0050807;GO:0051966;GO:0060173;GO:0060323;GO:0060325;GO:0061743;GO:0090082;GO:0090090;GO:0090244;GO:0090647;GO:…	multicellular organism development;negative regulation of Wnt signaling pathway;regulation of receptor activity;Wnt signaling pathway;negative regulation of cardiac muscle cell differentiation;negative regulation of canonical Wnt signaling pathway;negative regulation of pathway-restricted SMAD protein phosphorylation;negative regulation of canonical Wnt signaling pathway;negative regulation of Wn…	GO:0005515;GO:0004871;GO:0008083;GO:0050750;GO:0039706;GO:0039706;GO:0048019	protein binding;signal transducer activity;growth factor activity;low-density lipoprotein particle receptor binding;co-receptor binding;co-receptor binding;receptor antagonist activity	GO:0005576;GO:0005576;GO:0005615;GO:0005886;GO:0031901	extracellular region;extracellular region;extracellular space;plasma membrane;early endosome membrane
FLNC	0.441046	-1.181	1.96067e-10	9.66375e-09	FLNC	GO:0034329;GO:0048747;GO:0034329	cell junction assembly;muscle fiber development;cell junction assembly	GO:0005515;GO:0051015;GO:0003779;GO:0005515;GO:0008092;GO:0030506;GO:0030506;GO:0005515;GO:0051015;GO:0003779;GO:0005515;GO:0008092;GO:0030506	protein binding;actin filament binding;actin binding;protein binding;cytoskeletal protein binding;ankyrin binding;ankyrin binding;protein binding;actin filament binding;actin binding;protein binding;cytoskeletal protein binding;ankyrin binding	GO:0005737;GO:0005737;GO:0016020;GO:0005829;GO:0005886;GO:0005856;GO:0005925;GO:0005829;GO:0030018;GO:0042383;GO:0043034;GO:0016528;GO:0042383;GO:0005737;GO:0005737;GO:0016020;GO:0005829;GO:0005886;GO:0005856;GO:0005925;GO:0005829;GO:0030018;GO:0042383;GO:0043034	cytoplasm;cytoplasm;membrane;cytosol;plasma membrane;cytoskeleton;focal adhesion;cytosol;Z disc;sarcolemma;costamere;sarcoplasm;sarcolemma;cytoplasm;cytoplasm;membrane;cytosol;plasma membrane;cytoskeleton;focal adhesion;cytosol;Z disc;sarcolemma;costamere
PKP2	3.72438	1.897	2.02772e-10	9.9555e-09	PKP2	GO:0098609;GO:0007155;GO:0065009;GO:0031424;GO:0007507;GO:0055010;GO:0098609;GO:0086002;GO:0086091;GO:0070268;GO:0098609;GO:0086064;GO:0072659;GO:0002159;GO:0086073;GO:0098911;GO:0086005;GO:0010765;GO:0045110;GO:0086019;GO:0048496;GO:0098609;GO:0007155;GO:0065009;GO:0031424;GO:0007507;GO:0055010;GO:0098609;GO:0086002;GO:0086091;GO:0070268;GO:0098609;GO:0086064;GO:0072659;GO:0002159;GO:0086073;GO:…	cell-cell adhesion;cell adhesion;regulation of molecular function;keratinization;heart development;ventricular cardiac muscle tissue morphogenesis;cell-cell adhesion;cardiac muscle cell action potential involved in contraction;regulation of heart rate by cardiac conduction;cornification;cell-cell adhesion;cell communication by electrical coupling involved in cardiac conduction;protein localizatio…	GO:0005515;GO:0005488;GO:0005515;GO:0045296;GO:0003674;GO:0032947;GO:0017080;GO:0044325;GO:0005080;GO:0045294;GO:0086083;GO:0019215;GO:0005515;GO:0005488;GO:0005515;GO:0045296;GO:0003674;GO:0032947;GO:0017080;GO:0044325;GO:0005080;GO:0045294;GO:0086083;GO:0019215	protein binding;binding;protein binding;cadherin binding;molecular_function;protein complex scaffold activity;sodium channel regulator activity;ion channel binding;protein kinase C binding;alpha-catenin binding;cell adhesive protein binding involved in bundle of His cell-Purkinje myocyte communication;intermediate filament binding;protein binding;binding;protein binding;cadherin binding;molecular…	GO:0005634;GO:0005634;GO:0005654;GO:0005886;GO:0030054;GO:0030054;GO:0005886;GO:0016021;GO:0005912;GO:0005911;GO:0005911;GO:0001533;GO:0030057;GO:0030057;GO:0014704;GO:0014704;GO:0005882;GO:0030057;GO:0005634;GO:0005634;GO:0005654;GO:0005886;GO:0030054;GO:0030054;GO:0005886;GO:0016021;GO:0005912;GO:0005911;GO:0005911;GO:0001533;GO:0030057;GO:0030057;GO:0014704;GO:0014704;GO:0005882;GO:0030057;GO:…	nucleus;nucleus;nucleoplasm;plasma membrane;cell junction;cell junction;plasma membrane;integral component of membrane;adherens junction;cell-cell junction;cell-cell junction;cornified envelope;desmosome;desmosome;intercalated disc;intercalated disc;intermediate filament;desmosome;nucleus;nucleus;nucleoplasm;plasma membrane;cell junction;cell junction;plasma membrane;integral component of membran…
PTPRU	2.17046	1.118	2.50752e-10	1.22636e-08	PTPRU	GO:0006470;GO:0016311;GO:0007155;GO:0007155;GO:0035335;GO:0030154;GO:0008285;GO:0034394;GO:0006470;GO:0030336;GO:0060070;GO:0098609;GO:0007185;GO:0031100;GO:0034109;GO:0051384;GO:0006470;GO:0016311;GO:0007155;GO:0007155;GO:0035335;GO:0030154;GO:0008285;GO:0034394;GO:0006470;GO:0030336;GO:0060070;GO:0098609;GO:0007185;GO:0006470;GO:0016311;GO:0007155;GO:0007155;GO:0035335;GO:0030154;GO:0008285;GO:…	protein dephosphorylation;dephosphorylation;cell adhesion;cell adhesion;peptidyl-tyrosine dephosphorylation;cell differentiation;negative regulation of cell proliferation;protein localization to cell surface;protein dephosphorylation;negative regulation of cell migration;canonical Wnt signaling pathway;cell-cell adhesion;transmembrane receptor protein tyrosine phosphatase signaling pathway;animal…	GO:0005515;GO:0016791;GO:0004725;GO:0016787;GO:0004721;GO:0005515;GO:0004725;GO:0004725;GO:0042802;GO:0008013;GO:0005001;GO:0008013;GO:0005515;GO:0016791;GO:0004725;GO:0016787;GO:0004721;GO:0005515;GO:0004725;GO:0004725;GO:0042802;GO:0008013;GO:0005001;GO:0005515;GO:0016791;GO:0004725;GO:0016787;GO:0004721;GO:0005515;GO:0004725;GO:0004725;GO:0042802;GO:0008013;GO:0005001;GO:0005515;GO:0016791;GO:…	protein binding;phosphatase activity;protein tyrosine phosphatase activity;hydrolase activity;phosphoprotein phosphatase activity;protein binding;protein tyrosine phosphatase activity;protein tyrosine phosphatase activity;identical protein binding;beta-catenin binding;transmembrane receptor protein tyrosine phosphatase activity;beta-catenin binding;protein binding;phosphatase activity;protein tyr…	GO:0016020;GO:0016021;GO:0005886;GO:0030054;GO:0005886;GO:0005887;GO:0005911;GO:0016020;GO:0016021;GO:0005886;GO:0030054;GO:0005886;GO:0005887;GO:0005911;GO:0016020;GO:0016021;GO:0005886;GO:0030054;GO:0005886;GO:0005887;GO:0005911;GO:0016020;GO:0016021;GO:0005886;GO:0030054;GO:0005886;GO:0005887;GO:0005911	membrane;integral component of membrane;plasma membrane;cell junction;plasma membrane;integral component of plasma membrane;cell-cell junction;membrane;integral component of membrane;plasma membrane;cell junction;plasma membrane;integral component of plasma membrane;cell-cell junction;membrane;integral component of membrane;plasma membrane;cell junction;plasma membrane;integral component of plasm…
INAVA	4.99332	2.32	2.53554e-10	1.23056e-08	INAVA	GO:0002376;GO:0045087;GO:0045087;GO:0070431;GO:0031398;GO:0043123;GO:0032874;GO:0032731;GO:0000187;GO:0032733;GO:0032755;GO:0060729;GO:0002221;GO:0002367;GO:0032494;GO:0032495;GO:0034334;GO:1903409;GO:0002376;GO:0045087;GO:0045087;GO:0070431;GO:0031398;GO:0043123;GO:0032874;GO:0032731;GO:0000187;GO:0032733;GO:0032755;GO:0060729;GO:0002221;GO:0002367;GO:0032494;GO:0032495;GO:0034334;GO:1903409	immune system process;innate immune response;innate immune response;nucleotide-binding oligomerization domain containing 2 signaling pathway;positive regulation of protein ubiquitination;positive regulation of I-kappaB kinase/NF-kappaB signaling;positive regulation of stress-activated MAPK cascade;positive regulation of interleukin-1 beta production;activation of MAPK activity;positive regulation…	GO:0005515;GO:0005515	protein binding;protein binding	GO:0005634;GO:0005634;GO:0005737;GO:0005737;GO:0005634;GO:0005634;GO:0005737;GO:0005737	nucleus;nucleus;cytoplasm;cytoplasm;nucleus;nucleus;cytoplasm;cytoplasm
MAF	0.374231	-1.418	2.53533e-10	1.23056e-08	MAF	GO:0006355;GO:0006351;GO:0006355;GO:0006351;GO:0006366;GO:0000122;GO:0001816;GO:0002088;GO:0010628;GO:0032330;GO:0045944;GO:0048468;GO:0048839;GO:0070306;GO:0070306;GO:0006355;GO:0006351;GO:0006366;GO:0070306	regulation of transcription, DNA-templated;transcription, DNA-templated;regulation of transcription, DNA-templated;transcription, DNA-templated;transcription from RNA polymerase II promoter;negative regulation of transcription from RNA polymerase II promoter;cytokine production;lens development in camera-type eye;positive regulation of gene expression;regulation of chondrocyte differentiation;pos…	GO:0003677;GO:0003700;GO:0003677;GO:0003700;GO:0005515;GO:0000981;GO:0000981;GO:0001228;GO:0043565;GO:0003677;GO:0003700;GO:0005515;GO:0000981;GO:0000981	DNA binding;DNA binding transcription factor activity;DNA binding;DNA binding transcription factor activity;protein binding;RNA polymerase II transcription factor activity, sequence-specific DNA binding;RNA polymerase II transcription factor activity, sequence-specific DNA binding;transcriptional activator activity, RNA polymerase II transcription regulatory region sequence-specific DNA binding;s…	GO:0005634;GO:0005634;GO:0000785;GO:0005737;GO:0005634;GO:0000785	nucleus;nucleus;chromatin;cytoplasm;nucleus;chromatin
LINC01638	0.150935	-2.728	2.72519e-10	1.31756e-08	LINC01638	NA	NA	NA	NA	NA	NA
KLF6	2.04911	1.035	3.3555e-10	1.61e-08	KLF6	GO:0006366;GO:0006351;GO:0006355;GO:0045893;GO:0045944;GO:0030183;GO:0006366;GO:0006351;GO:0006355;GO:0045893;GO:0045944;GO:0030183;GO:0006366;GO:0006351;GO:0006355;GO:0045893;GO:0045944;GO:0030183	transcription from RNA polymerase II promoter;transcription, DNA-templated;regulation of transcription, DNA-templated;positive regulation of transcription, DNA-templated;positive regulation of transcription from RNA polymerase II promoter;B cell differentiation;transcription from RNA polymerase II promoter;transcription, DNA-templated;regulation of transcription, DNA-templated;positive regulation…	GO:0003676;GO:0046872;GO:0003677;GO:0005515;GO:0000978;GO:0000981;GO:0001077;GO:0003676;GO:0046872;GO:0003677;GO:0005515;GO:0000978;GO:0000981;GO:0001077;GO:0003676;GO:0046872;GO:0003677;GO:0005515;GO:0000978;GO:0000981;GO:0001077	nucleic acid binding;metal ion binding;DNA binding;protein binding;RNA polymerase II proximal promoter sequence-specific DNA binding;RNA polymerase II transcription factor activity, sequence-specific DNA binding;transcriptional activator activity, RNA polymerase II proximal promoter sequence-specific DNA binding;nucleic acid binding;metal ion binding;DNA binding;protein binding;RNA polymerase II …	GO:0005634;GO:0005634;GO:0043231;GO:0005634;GO:0005730;GO:0005829;GO:0001650;GO:0005634;GO:0005634;GO:0043231;GO:0005634;GO:0005730;GO:0005829;GO:0001650;GO:0005634;GO:0005634;GO:0043231;GO:0005634;GO:0005730;GO:0005829;GO:0001650	nucleus;nucleus;intracellular membrane-bounded organelle;nucleus;nucleolus;cytosol;fibrillar center;nucleus;nucleus;intracellular membrane-bounded organelle;nucleus;nucleolus;cytosol;fibrillar center;nucleus;nucleus;intracellular membrane-bounded organelle;nucleus;nucleolus;cytosol;fibrillar center
PTPRJ	1.72788	0.789	3.34701e-10	1.61e-08	PTPRJ	GO:0006470;GO:0016311;GO:0008285;GO:0050852;GO:0035335;GO:0035335;GO:0043312;GO:0045785;GO:0030308;GO:0043116;GO:0048008;GO:0030155;GO:0051897;GO:0010642;GO:0051898;GO:0030336;GO:0050918;GO:0043407;GO:0051894;GO:0050860;GO:0050860;GO:0042059;GO:0060242;GO:0006470;GO:0016311;GO:0008285;GO:0050852;GO:0035335;GO:0035335;GO:0043312;GO:0045785;GO:0030308;GO:0043116;GO:0048008;GO:0030155;GO:0051897;GO:…	protein dephosphorylation;dephosphorylation;negative regulation of cell proliferation;T cell receptor signaling pathway;peptidyl-tyrosine dephosphorylation;peptidyl-tyrosine dephosphorylation;neutrophil degranulation;positive regulation of cell adhesion;negative regulation of cell growth;negative regulation of vascular permeability;platelet-derived growth factor receptor signaling pathway;regulat…	GO:0005515;GO:0016791;GO:0004725;GO:0016787;GO:0004721;GO:0005515;GO:0004725;GO:0004725;GO:0042802;GO:0019901;GO:0008013;GO:0045295;GO:0070097;GO:0051019;GO:0016791;GO:0016791;GO:0005161;GO:0004725;GO:0005515;GO:0016787;GO:0004721;GO:0005515;GO:0004725;GO:0016791;GO:0004725;GO:0004725;GO:0042802;GO:0019901;GO:0008013;GO:0045295;GO:0070097;GO:0051019;GO:0016791;GO:0016791;GO:0005161;GO:0004725;GO:…	protein binding;phosphatase activity;protein tyrosine phosphatase activity;hydrolase activity;phosphoprotein phosphatase activity;protein binding;protein tyrosine phosphatase activity;protein tyrosine phosphatase activity;identical protein binding;protein kinase binding;beta-catenin binding;gamma-catenin binding;delta-catenin binding;mitogen-activated protein kinase binding;phosphatase activity;p…	GO:0016020;GO:0016021;GO:0005886;GO:0005886;GO:0042995;GO:0030054;GO:0005886;GO:0070062;GO:0032587;GO:0005887;GO:0035579;GO:0009986;GO:0005911;GO:0001772;GO:0016020;GO:0016021;GO:0005886;GO:0005886;GO:0042995;GO:0030054;GO:0005886;GO:0070062;GO:0032587;GO:0005887;GO:0035579;GO:0009986;GO:0005911;GO:0001772;GO:0016020;GO:0016021;GO:0016020;GO:0016021	membrane;integral component of membrane;plasma membrane;plasma membrane;cell projection;cell junction;plasma membrane;extracellular exosome;ruffle membrane;integral component of plasma membrane;specific granule membrane;cell surface;cell-cell junction;immunological synapse;membrane;integral component of membrane;plasma membrane;plasma membrane;cell projection;cell junction;plasma membrane;extrace…
MOV10L1	0.34772	-1.524	3.48875e-10	1.66762e-08	MOV10L1	GO:0007275;GO:0007283;GO:0007283;GO:0007141;GO:0034587;GO:0043046;GO:0007281;GO:0007275;GO:0007283;GO:0007283;GO:0007141;GO:0034587;GO:0043046;GO:0007281;GO:0007275;GO:0007283;GO:0007283;GO:0007141;GO:0034587;GO:0043046;GO:0007281;GO:0007275;GO:0007283;GO:0007283;GO:0007141;GO:0034587;GO:0043046;GO:0007281;GO:0007275;GO:0007283;GO:0007283;GO:0007141;GO:0034587;GO:0043046;GO:0007281;GO:0007275;GO:…	multicellular organism development;spermatogenesis;spermatogenesis;male meiosis I;piRNA metabolic process;DNA methylation involved in gamete generation;germ cell development;multicellular organism development;spermatogenesis;spermatogenesis;male meiosis I;piRNA metabolic process;DNA methylation involved in gamete generation;germ cell development;multicellular organism development;spermatogenesis;…	GO:0003723;GO:0000166;GO:0005524;GO:0005524;GO:0016787;GO:0004386;GO:0000287;GO:0004004;GO:0004004;GO:0003723;GO:0000166;GO:0005524;GO:0005524;GO:0016787;GO:0004386;GO:0000287;GO:0004004;GO:0004004;GO:0003723;GO:0000166;GO:0005524;GO:0005524;GO:0016787;GO:0004386;GO:0000287;GO:0004004;GO:0004004;GO:0003723;GO:0000166;GO:0005524;GO:0005524;GO:0016787;GO:0004386;GO:0000287;GO:0004004;GO:0004004;GO:…	RNA binding;nucleotide binding;ATP binding;ATP binding;hydrolase activity;helicase activity;magnesium ion binding;ATP-dependent RNA helicase activity;ATP-dependent RNA helicase activity;RNA binding;nucleotide binding;ATP binding;ATP binding;hydrolase activity;helicase activity;magnesium ion binding;ATP-dependent RNA helicase activity;ATP-dependent RNA helicase activity;RNA binding;nucleotide bind…	GO:0005737;GO:0043186;GO:0071546;GO:0005737;GO:0043186;GO:0071546;GO:0005737;GO:0043186;GO:0071546;GO:0005737;GO:0043186;GO:0071546;GO:0005737;GO:0043186;GO:0071546;GO:0005737;GO:0043186;GO:0071546	cytoplasm;P granule;pi-body;cytoplasm;P granule;pi-body;cytoplasm;P granule;pi-body;cytoplasm;P granule;pi-body;cytoplasm;P granule;pi-body;cytoplasm;P granule;pi-body
MYADM	1.72548	0.787	3.75797e-10	1.78956e-08	MYADM	GO:0030335;GO:0010629;GO:0001933;GO:0061028;GO:0072659;GO:0031579;GO:0030837;GO:1900026;GO:0034115;GO:0090038;GO:0030335;GO:0010629;GO:0001933;GO:0061028;GO:0072659;GO:0031579;GO:0030837;GO:1900026;GO:0034115;GO:0090038;GO:0030335;GO:0010629;GO:0001933;GO:0061028;GO:0072659;GO:0031579;GO:0030837;GO:1900026;GO:0034115;GO:0090038;GO:0030335;GO:0010629;GO:0001933;GO:0061028;GO:0072659;GO:0031579;GO:…	positive regulation of cell migration;negative regulation of gene expression;negative regulation of protein phosphorylation;establishment of endothelial barrier;protein localization to plasma membrane;membrane raft organization;negative regulation of actin filament polymerization;positive regulation of substrate adhesion-dependent cell spreading;negative regulation of heterotypic cell-cell adhesi…	GO:0003674;GO:0003674;GO:0003674;GO:0003674;GO:0003674	molecular_function;molecular_function;molecular_function;molecular_function;molecular_function	GO:0016020;GO:0016021;GO:0016020;GO:0016021;GO:0016020;GO:0016021;GO:0016020;GO:0016021;GO:0005886;GO:0005886;GO:0045121;GO:0070062;GO:0001726;GO:0030864;GO:0005911;GO:0016020;GO:0016021;GO:0005886;GO:0005886;GO:0045121;GO:0070062;GO:0001726;GO:0030864;GO:0005911;GO:0016020;GO:0016021;GO:0005886;GO:0005886;GO:0045121;GO:0070062;GO:0001726;GO:0030864;GO:0005911;GO:0016020;GO:0016021;GO:0016020;GO:…	membrane;integral component of membrane;membrane;integral component of membrane;membrane;integral component of membrane;membrane;integral component of membrane;plasma membrane;plasma membrane;membrane raft;extracellular exosome;ruffle;cortical actin cytoskeleton;cell-cell junction;membrane;integral component of membrane;plasma membrane;plasma membrane;membrane raft;extracellular exosome;ruffle;co…
AFF3	0.224689	-2.154	3.83375e-10	1.81212e-08	AFF3	GO:0006351;GO:0006355;GO:0035116;GO:0034612;GO:0006351;GO:0006355;GO:0035116;GO:0034612;GO:0006351;GO:0006355;GO:0035116;GO:0034612	transcription, DNA-templated;regulation of transcription, DNA-templated;embryonic hindlimb morphogenesis;response to tumor necrosis factor;transcription, DNA-templated;regulation of transcription, DNA-templated;embryonic hindlimb morphogenesis;response to tumor necrosis factor;transcription, DNA-templated;regulation of transcription, DNA-templated;embryonic hindlimb morphogenesis;response to tumo…	GO:0003677;GO:0003690;GO:0003677;GO:0003690;GO:0003677;GO:0003690	DNA binding;double-stranded DNA binding;DNA binding;double-stranded DNA binding;DNA binding;double-stranded DNA binding	GO:0005634;GO:0005829;GO:0005654;GO:0016604;GO:0005634;GO:0005634;GO:0005829;GO:0005654;GO:0016604;GO:0005634;GO:0005634;GO:0005829;GO:0005654;GO:0016604;GO:0005634	nucleus;cytosol;nucleoplasm;nuclear body;nucleus;nucleus;cytosol;nucleoplasm;nuclear body;nucleus;nucleus;cytosol;nucleoplasm;nuclear body;nucleus
GRIN2A	0.206041	-2.279	3.83397e-10	1.81212e-08	GRIN2A	GO:0006811;GO:0034220;GO:0070588;GO:0098655;GO:0035235;GO:0000165;GO:0007268;GO:0007420;GO:0019722;GO:0048167;GO:0097553;GO:0097553;GO:0098976;GO:0007215;GO:0007611;GO:0045471;GO:0001964;GO:0001975;GO:0006816;GO:0007268;GO:0007611;GO:0007612;GO:0007613;GO:0008542;GO:0009611;GO:0019233;GO:0022008;GO:0030431;GO:0033058;GO:0040011;GO:0042177;GO:0042391;GO:0042417;GO:0042428;GO:0042493;GO:0043065;GO:…	ion transport;ion transmembrane transport;calcium ion transmembrane transport;cation transmembrane transport;ionotropic glutamate receptor signaling pathway;MAPK cascade;chemical synaptic transmission;brain development;calcium-mediated signaling;regulation of synaptic plasticity;calcium ion transmembrane import into cytosol;calcium ion transmembrane import into cytosol;excitatory chemical synapti…	GO:0005216;GO:0004872;GO:0004970;GO:0005234;GO:0046872;GO:0008270;GO:0005515;GO:0005088;GO:0004972;GO:0004972;GO:0022849;GO:0022849;GO:0004972;GO:0005261;GO:0005262;GO:0005216;GO:0004872;GO:0004970;GO:0005234;GO:0046872;GO:0008270;GO:0005515;GO:0005088;GO:0004972;GO:0004972;GO:0022849;GO:0022849;GO:0005216;GO:0004872;GO:0004970;GO:0005234;GO:0046872;GO:0008270;GO:0005515;GO:0005088;GO:0004972;GO:…	ion channel activity;receptor activity;ionotropic glutamate receptor activity;extracellularly glutamate-gated ion channel activity;metal ion binding;zinc ion binding;protein binding;Ras guanyl-nucleotide exchange factor activity;NMDA glutamate receptor activity;NMDA glutamate receptor activity;glutamate-gated calcium ion channel activity;glutamate-gated calcium ion channel activity;NMDA glutamate…	GO:0016020;GO:0016021;GO:0005886;GO:0005886;GO:0030054;GO:0045202;GO:0045211;GO:0005886;GO:0005887;GO:0014069;GO:0005887;GO:0009986;GO:0017146;GO:0017146;GO:0005783;GO:0008021;GO:0009986;GO:0014069;GO:0017146;GO:0042734;GO:0043005;GO:0098839;GO:0099061;GO:0016020;GO:0016021;GO:0005886;GO:0005886;GO:0030054;GO:0045202;GO:0045211;GO:0005886;GO:0005887;GO:0014069;GO:0005887;GO:0009986;GO:0017146;GO:…	membrane;integral component of membrane;plasma membrane;plasma membrane;cell junction;synapse;postsynaptic membrane;plasma membrane;integral component of plasma membrane;postsynaptic density;integral component of plasma membrane;cell surface;NMDA selective glutamate receptor complex;NMDA selective glutamate receptor complex;endoplasmic reticulum;synaptic vesicle;cell surface;postsynaptic density;…
ALX4	0.49073	-1.027	3.9812e-10	1.87471e-08	ALX4	GO:0006355;GO:0007275;GO:0006357;GO:0006366;GO:0006351;GO:0001501;GO:0001942;GO:0007389;GO:0007517;GO:0009791;GO:0009952;GO:0035108;GO:0035115;GO:0035116;GO:0042733;GO:0042981;GO:0045944;GO:0048565;GO:0048704;GO:0048705;GO:0060021	regulation of transcription, DNA-templated;multicellular organism development;regulation of transcription from RNA polymerase II promoter;transcription from RNA polymerase II promoter;transcription, DNA-templated;skeletal system development;hair follicle development;pattern specification process;muscle organ development;post-embryonic development;anterior/posterior pattern specification;limb morp…	GO:0003677;GO:0003700;GO:0043565;GO:0003677;GO:0000981;GO:0000981;GO:0000977;GO:0001228;GO:0046982;GO:0071837	DNA binding;DNA binding transcription factor activity;sequence-specific DNA binding;DNA binding;RNA polymerase II transcription factor activity, sequence-specific DNA binding;RNA polymerase II transcription factor activity, sequence-specific DNA binding;RNA polymerase II regulatory region sequence-specific DNA binding;transcriptional activator activity, RNA polymerase II transcription regulatory …	GO:0005634;GO:0005634;GO:0005634;GO:0005667	nucleus;nucleus;nucleus;transcription factor complex
NFIL3	1.84165	0.881	4.1045e-10	1.92562e-08	NFIL3	GO:0006355;GO:0006955;GO:0006351;GO:0006366;GO:0007623;GO:0010628;GO:0048511;GO:0071353;GO:0006955;GO:0000122;GO:0006366;GO:0007623	regulation of transcription, DNA-templated;immune response;transcription, DNA-templated;transcription from RNA polymerase II promoter;circadian rhythm;positive regulation of gene expression;rhythmic process;cellular response to interleukin-4;immune response;negative regulation of transcription from RNA polymerase II promoter;transcription from RNA polymerase II promoter;circadian rhythm	GO:0003700;GO:0003677;GO:0005515;GO:0000978;GO:0042802;GO:0000981;GO:0003677;GO:0003714;GO:0003700;GO:0001078;GO:0000977	DNA binding transcription factor activity;DNA binding;protein binding;RNA polymerase II proximal promoter sequence-specific DNA binding;identical protein binding;RNA polymerase II transcription factor activity, sequence-specific DNA binding;DNA binding;transcription corepressor activity;DNA binding transcription factor activity;transcriptional repressor activity, RNA polymerase II proximal promot…	GO:0005634;GO:0005634;GO:0005634	nucleus;nucleus;nucleus
ARHGDIB	2.84613	1.509	4.61502e-10	2.15714e-08	ARHGDIB	GO:0050790;GO:0043547;GO:0071461;GO:0051056;GO:0007275;GO:2000249;GO:0035023;GO:0035023;GO:0007162;GO:1901164;GO:0050790;GO:0050790;GO:0043547;GO:0051056;GO:0007275;GO:2000249;GO:0035023;GO:0035023;GO:0007162;GO:1901164;GO:0050790;GO:0043547;GO:0051056;GO:0007275;GO:2000249;GO:0035023;GO:0035023;GO:0007162;GO:1901164;GO:0050790;GO:0050790;GO:0050790	regulation of catalytic activity;positive regulation of GTPase activity;cellular response to redox state;regulation of small GTPase mediated signal transduction;multicellular organism development;regulation of actin cytoskeleton reorganization;regulation of Rho protein signal transduction;regulation of Rho protein signal transduction;negative regulation of cell adhesion;negative regulation of tro…	GO:0005094;GO:0005515;GO:0005096;GO:0048365;GO:0005094;GO:0003924;GO:0005094;GO:0005094;GO:0005094;GO:0005515;GO:0005096;GO:0048365;GO:0005094;GO:0003924;GO:0005094;GO:0005094;GO:0005515;GO:0005096;GO:0048365;GO:0005094;GO:0003924;GO:0005094;GO:0005094;GO:0005094;GO:0005094	Rho GDP-dissociation inhibitor activity;protein binding;GTPase activator activity;Rac GTPase binding;Rho GDP-dissociation inhibitor activity;GTPase activity;Rho GDP-dissociation inhibitor activity;Rho GDP-dissociation inhibitor activity;Rho GDP-dissociation inhibitor activity;protein binding;GTPase activator activity;Rac GTPase binding;Rho GDP-dissociation inhibitor activity;GTPase activity;Rho G…	GO:0005737;GO:0005737;GO:0005829;GO:0005829;GO:0005856;GO:0016020;GO:0005829;GO:0070062;GO:0031410;GO:0005737;GO:0005737;GO:0005737;GO:0005829;GO:0005829;GO:0005856;GO:0005829;GO:0070062;GO:0031410;GO:0005737;GO:0005737;GO:0005829;GO:0005829;GO:0005856;GO:0005829;GO:0070062;GO:0031410;GO:0005737;GO:0005737;GO:0005737	cytoplasm;cytoplasm;cytosol;cytosol;cytoskeleton;membrane;cytosol;extracellular exosome;cytoplasmic vesicle;cytoplasm;cytoplasm;cytoplasm;cytosol;cytosol;cytoskeleton;cytosol;extracellular exosome;cytoplasmic vesicle;cytoplasm;cytoplasm;cytosol;cytosol;cytoskeleton;cytosol;extracellular exosome;cytoplasmic vesicle;cytoplasm;cytoplasm;cytoplasm
SLC26A6	1.76296	0.818	4.95534e-10	2.30656e-08	SLC26A6	GO:0055085;GO:0006820;GO:0008272;GO:0051454;GO:0006811;GO:0006821;GO:0006821;GO:1902476;GO:0098656;GO:1902358;GO:0071346;GO:0006811;GO:0071320;GO:0042391;GO:0051453;GO:2001150;GO:0015701;GO:0048240;GO:0051454;GO:0050892;GO:0071332;GO:0030321;GO:0030321;GO:0070633;GO:0008272;GO:0008272;GO:0019532;GO:0019532;GO:0015724;GO:0015797;GO:0042045;GO:0046724;GO:0055085;GO:0006820;GO:0008272;GO:0051454;GO:…	transmembrane transport;anion transport;sulfate transport;intracellular pH elevation;ion transport;chloride transport;chloride transport;chloride transmembrane transport;anion transmembrane transport;sulfate transmembrane transport;cellular response to interferon-gamma;ion transport;cellular response to cAMP;regulation of membrane potential;regulation of intracellular pH;positive regulation of di…	GO:0008271;GO:0015116;GO:0008509;GO:0015301;GO:0015297;GO:0005254;GO:0015562;GO:0030165;GO:0005254;GO:0005452;GO:0015106;GO:0015106;GO:0015108;GO:0015108;GO:0015301;GO:0015301;GO:0015116;GO:0019531;GO:0015499;GO:0015660;GO:0008271;GO:0015116;GO:0008509;GO:0015301;GO:0015297;GO:0005254;GO:0015562;GO:0030165;GO:0005254;GO:0005452;GO:0015106;GO:0015106;GO:0015108;GO:0015108;GO:0015301;GO:0015301;GO:…	secondary active sulfate transmembrane transporter activity;sulfate transmembrane transporter activity;anion transmembrane transporter activity;anion:anion antiporter activity;antiporter activity;chloride channel activity;efflux transmembrane transporter activity;PDZ domain binding;chloride channel activity;inorganic anion exchanger activity;bicarbonate transmembrane transporter activity;bicarbon…	GO:0016021;GO:0016020;GO:0005887;GO:0016020;GO:0016021;GO:0005783;GO:0005886;GO:0030659;GO:0031410;GO:0034707;GO:0005886;GO:0005887;GO:0043231;GO:0016323;GO:0016323;GO:0016324;GO:0016324;GO:0031982;GO:0031526;GO:0097225;GO:0012506;GO:0016021;GO:0016020;GO:0005887;GO:0016020;GO:0016021;GO:0005783;GO:0005886;GO:0030659;GO:0031410;GO:0034707;GO:0005886;GO:0005887;GO:0043231;GO:0016323;GO:0016323;GO:…	integral component of membrane;membrane;integral component of plasma membrane;membrane;integral component of membrane;endoplasmic reticulum;plasma membrane;cytoplasmic vesicle membrane;cytoplasmic vesicle;chloride channel complex;plasma membrane;integral component of plasma membrane;intracellular membrane-bounded organelle;basolateral plasma membrane;basolateral plasma membrane;apical plasma memb…
LINC01484	0.213454	-2.228	4.97111e-10	2.30656e-08	LINC01484	NA	NA	NA	NA	NA	NA
	2.57934	1.367	5.67957e-10	2.6177e-08	AC099066.2	NA	NA	NA	NA	NA	NA
ADAM19	0.479632	-1.06	5.68302e-10	2.6177e-08	ADAM19	GO:0006508;GO:0006509;GO:0006509;GO:0006508;GO:0006509;GO:0030198;GO:0007507;GO:0006508;GO:0006509;GO:0030198	proteolysis;membrane protein ectodomain proteolysis;membrane protein ectodomain proteolysis;proteolysis;membrane protein ectodomain proteolysis;extracellular matrix organization;heart development;proteolysis;membrane protein ectodomain proteolysis;extracellular matrix organization	GO:0017124;GO:0004222;GO:0004222;GO:0017124;GO:0004222;GO:0008237;GO:0017124;GO:0046872;GO:0016787;GO:0005515;GO:0008233;GO:0004222;GO:0008237;GO:0017124;GO:0046872;GO:0016787;GO:0005515;GO:0008233	SH3 domain binding;metalloendopeptidase activity;metalloendopeptidase activity;SH3 domain binding;metalloendopeptidase activity;metallopeptidase activity;SH3 domain binding;metal ion binding;hydrolase activity;protein binding;peptidase activity;metalloendopeptidase activity;metallopeptidase activity;SH3 domain binding;metal ion binding;hydrolase activity;protein binding;peptidase activity	GO:0016021;GO:0005794;GO:0016021;GO:0005794;GO:0016020;GO:0016021;GO:0005794;GO:0016020;GO:0005886;GO:0016021;GO:0005794;GO:0016020;GO:0005886	integral component of membrane;Golgi apparatus;integral component of membrane;Golgi apparatus;membrane;integral component of membrane;Golgi apparatus;membrane;plasma membrane;integral component of membrane;Golgi apparatus;membrane;plasma membrane
SLC14A1	0.185823	-2.428	6.68184e-10	3.06663e-08	SLC14A1	GO:0071918;GO:0055085;GO:0015840;GO:0071918;GO:0071918;GO:0071918;GO:0071918;GO:0055085;GO:0015840;GO:0071918;GO:0071918;GO:0071918;GO:0071918;GO:0071918;GO:0071918;GO:0071918;GO:0071918;GO:0055085;GO:0006833;GO:0015840;GO:0015840;GO:0071918;GO:0071918;GO:0071918;GO:0055085;GO:0015840;GO:0071918;GO:0071918;GO:0071918;GO:0071918	urea transmembrane transport;transmembrane transport;urea transport;urea transmembrane transport;urea transmembrane transport;urea transmembrane transport;urea transmembrane transport;transmembrane transport;urea transport;urea transmembrane transport;urea transmembrane transport;urea transmembrane transport;urea transmembrane transport;urea transmembrane transport;urea transmembrane transport;ur…	GO:0015204;GO:0015204;GO:0015265;GO:0015204;GO:0015204;GO:0015204;GO:0015204;GO:0015265;GO:0015204;GO:0015204;GO:0015204;GO:0015204;GO:0015204;GO:0015204;GO:0015204;GO:0005372;GO:0015204;GO:0015265;GO:0015204;GO:0015204;GO:0015204;GO:0015265;GO:0015204;GO:0015204;GO:0015204	urea transmembrane transporter activity;urea transmembrane transporter activity;urea channel activity;urea transmembrane transporter activity;urea transmembrane transporter activity;urea transmembrane transporter activity;urea transmembrane transporter activity;urea channel activity;urea transmembrane transporter activity;urea transmembrane transporter activity;urea transmembrane transporter acti…	GO:0016021;GO:0016020;GO:0043231;GO:0005730;GO:0005886;GO:0005886;GO:0005887;GO:0016323;GO:0005887;GO:0016021;GO:0016021;GO:0016020;GO:0005886;GO:0016021;GO:0016020;GO:0043231;GO:0005730;GO:0005886;GO:0005886;GO:0005887;GO:0016323;GO:0005887;GO:0016021;GO:0016020;GO:0016021;GO:0016020;GO:0005886;GO:0016021;GO:0016020;GO:0016021;GO:0016020;GO:0005886;GO:0016020;GO:0016021;GO:0016021;GO:0016020;GO:…	integral component of membrane;membrane;intracellular membrane-bounded organelle;nucleolus;plasma membrane;plasma membrane;integral component of plasma membrane;basolateral plasma membrane;integral component of plasma membrane;integral component of membrane;integral component of membrane;membrane;plasma membrane;integral component of membrane;membrane;intracellular membrane-bounded organelle;nucl…
FAM177A1	1.84165	0.881	7.1557e-10	3.27225e-08	FAM177A1	NA	NA	NA	NA	NA	NA
BFSP1	2.2548	1.173	7.64482e-10	3.48334e-08	BFSP1	GO:0007010;GO:0008150;GO:0048469;GO:0070307;GO:0007010;GO:0008150;GO:0007010;GO:0008150	cytoskeleton organization;biological_process;cell maturation;lens fiber cell development;cytoskeleton organization;biological_process;cytoskeleton organization;biological_process	GO:0005198;GO:0005515;GO:0005200;GO:0005212;GO:0005198;GO:0005515;GO:0005200;GO:0005212;GO:0005198;GO:0005515;GO:0005200;GO:0005212	structural molecule activity;protein binding;structural constituent of cytoskeleton;structural constituent of eye lens;structural molecule activity;protein binding;structural constituent of cytoskeleton;structural constituent of eye lens;structural molecule activity;protein binding;structural constituent of cytoskeleton;structural constituent of eye lens	GO:0005882;GO:0005737;GO:0016020;GO:0005886;GO:0005856;GO:0005938;GO:0005882;GO:0005737;GO:0016020;GO:0005886;GO:0005856;GO:0005882;GO:0005938;GO:0005882;GO:0005737;GO:0016020;GO:0005886;GO:0005856;GO:0005882;GO:0005938;GO:0005882	intermediate filament;cytoplasm;membrane;plasma membrane;cytoskeleton;cell cortex;intermediate filament;cytoplasm;membrane;plasma membrane;cytoskeleton;intermediate filament;cell cortex;intermediate filament;cytoplasm;membrane;plasma membrane;cytoskeleton;intermediate filament;cell cortex;intermediate filament
TPRA1	1.76663	0.821	7.74392e-10	3.51585e-08	TPRA1	GO:0007186;GO:0006629;GO:0007568;GO:0007186;GO:0006629;GO:0007568;GO:0007186;GO:0006629;GO:0007568;GO:0040016;GO:1901991;GO:0007186;GO:0006629;GO:0007568;GO:0007186;GO:0006629;GO:0007568	G-protein coupled receptor signaling pathway;lipid metabolic process;aging;G-protein coupled receptor signaling pathway;lipid metabolic process;aging;G-protein coupled receptor signaling pathway;lipid metabolic process;aging;embryonic cleavage;negative regulation of mitotic cell cycle phase transition;G-protein coupled receptor signaling pathway;lipid metabolic process;aging;G-protein coupled rec…	GO:0005515;GO:0004930;GO:0005515;GO:0004930;GO:0005515;GO:0004930;GO:0005515;GO:0004930;GO:0005515;GO:0004930	protein binding;G-protein coupled receptor activity;protein binding;G-protein coupled receptor activity;protein binding;G-protein coupled receptor activity;protein binding;G-protein coupled receptor activity;protein binding;G-protein coupled receptor activity	GO:0016020;GO:0016021;GO:0016021;GO:0016020;GO:0016021;GO:0016021;GO:0016020;GO:0016021;GO:0016021;GO:0016020;GO:0016021;GO:0016021;GO:0016020;GO:0016021;GO:0016020;GO:0016021;GO:0016021;GO:0016020;GO:0016021;GO:0016020;GO:0016021;GO:0016020;GO:0016021	membrane;integral component of membrane;integral component of membrane;membrane;integral component of membrane;integral component of membrane;membrane;integral component of membrane;integral component of membrane;membrane;integral component of membrane;integral component of membrane;membrane;integral component of membrane;membrane;integral component of membrane;integral component of membrane;memb…
OGFRL1	1.88949	0.918	9.18863e-10	4.15687e-08	OGFRL1	NA	NA	GO:0004872	receptor activity	GO:0016020	membrane
LIMA1	0.525586	-0.928	9.37509e-10	4.22613e-08	LIMA1	GO:0051017;GO:0030835;GO:0051017;GO:0030835;GO:0051017;GO:0031529;GO:0030835;GO:0051017;GO:0030835;GO:0051017;GO:0031529;GO:0030835;GO:0051017;GO:0030835;GO:0051017;GO:0031529;GO:0030835;GO:0051017;GO:0030835;GO:0051017;GO:0031529;GO:0030835;GO:0051017;GO:0030835;GO:0051017;GO:0031529;GO:0030835;GO:0051017;GO:0030835	actin filament bundle assembly;negative regulation of actin filament depolymerization;actin filament bundle assembly;negative regulation of actin filament depolymerization;actin filament bundle assembly;ruffle organization;negative regulation of actin filament depolymerization;actin filament bundle assembly;negative regulation of actin filament depolymerization;actin filament bundle assembly;ruff…	GO:0051015;GO:0046872;GO:0051015;GO:0046872;GO:0003779;GO:0005515;GO:0045296;GO:0051015;GO:0003785;GO:0051015;GO:0046872;GO:0003779;GO:0005515;GO:0045296;GO:0051015;GO:0003785;GO:0051015;GO:0046872;GO:0003779;GO:0005515;GO:0045296;GO:0051015;GO:0003785;GO:0051015;GO:0046872;GO:0003779;GO:0005515;GO:0045296;GO:0051015;GO:0003785;GO:0051015;GO:0046872;GO:0003779;GO:0005515;GO:0045296;GO:0051015;GO:…	actin filament binding;metal ion binding;actin filament binding;metal ion binding;actin binding;protein binding;cadherin binding;actin filament binding;actin monomer binding;actin filament binding;metal ion binding;actin binding;protein binding;cadherin binding;actin filament binding;actin monomer binding;actin filament binding;metal ion binding;actin binding;protein binding;cadherin binding;acti…	GO:0005886;GO:0005925;GO:0015629;GO:0005737;GO:0005829;GO:0005886;GO:0005925;GO:0015629;GO:0005856;GO:0030054;GO:0005925;GO:0005925;GO:0001725;GO:0032154;GO:0005737;GO:0005829;GO:0005886;GO:0005925;GO:0015629;GO:0005856;GO:0030054;GO:0005925;GO:0005925;GO:0001725;GO:0032154;GO:0005737;GO:0005829;GO:0005886;GO:0005925;GO:0015629;GO:0005856;GO:0030054;GO:0005925;GO:0005925;GO:0001725;GO:0032154;GO:…	plasma membrane;focal adhesion;actin cytoskeleton;cytoplasm;cytosol;plasma membrane;focal adhesion;actin cytoskeleton;cytoskeleton;cell junction;focal adhesion;focal adhesion;stress fiber;cleavage furrow;cytoplasm;cytosol;plasma membrane;focal adhesion;actin cytoskeleton;cytoskeleton;cell junction;focal adhesion;focal adhesion;stress fiber;cleavage furrow;cytoplasm;cytosol;plasma membrane;focal a…
PRR5L	2.38502	1.254	9.48579e-10	4.24581e-08	PRR5L	GO:0034599;GO:0061014;GO:0001933;GO:0009968;GO:0090316;GO:0010762;GO:0038203;GO:0034599;GO:0061014;GO:0001933;GO:0009968;GO:0090316;GO:0010762;GO:0001934;GO:0010762;GO:0014068;GO:0038203;GO:0038203;GO:0034599;GO:0061014;GO:0001933;GO:0009968;GO:0090316;GO:0010762;GO:0038203	cellular response to oxidative stress;positive regulation of mRNA catabolic process;negative regulation of protein phosphorylation;negative regulation of signal transduction;positive regulation of intracellular protein transport;regulation of fibroblast migration;TORC2 signaling;cellular response to oxidative stress;positive regulation of mRNA catabolic process;negative regulation of protein phos…	GO:0005515;GO:0031625;GO:0005515;GO:0031625;GO:0005515;GO:0031625	protein binding;ubiquitin protein ligase binding;protein binding;ubiquitin protein ligase binding;protein binding;ubiquitin protein ligase binding	GO:0031932;GO:0031932;GO:0005739;GO:0031932	TORC2 complex;TORC2 complex;mitochondrion;TORC2 complex
DSTYK	0.508387	-0.976	9.45333e-10	4.24581e-08	DSTYK	GO:0006468;GO:0016310;GO:0018108;GO:0043066;GO:0070374;GO:0044344;GO:0033674;GO:0045743;GO:0006468;GO:0016310;GO:0018108;GO:0043066;GO:0070374;GO:0044344;GO:0033674;GO:0045743;GO:0006468;GO:0016310;GO:0018108;GO:0043066;GO:0070374;GO:0044344;GO:0033674;GO:0045743	protein phosphorylation;phosphorylation;peptidyl-tyrosine phosphorylation;negative regulation of apoptotic process;positive regulation of ERK1 and ERK2 cascade;cellular response to fibroblast growth factor stimulus;positive regulation of kinase activity;positive regulation of fibroblast growth factor receptor signaling pathway;protein phosphorylation;phosphorylation;peptidyl-tyrosine phosphorylat…	GO:0005524;GO:0004672;GO:0000166;GO:0004674;GO:0016740;GO:0016301;GO:0004713;GO:0004674;GO:0004712;GO:0005524;GO:0004672;GO:0000166;GO:0004674;GO:0016740;GO:0016301;GO:0004713;GO:0004674;GO:0004712;GO:0005524;GO:0000166;GO:0004672;GO:0004674;GO:0016740;GO:0016301;GO:0004713;GO:0004674;GO:0004712	ATP binding;protein kinase activity;nucleotide binding;protein serine/threonine kinase activity;transferase activity;kinase activity;protein tyrosine kinase activity;protein serine/threonine kinase activity;protein serine/threonine/tyrosine kinase activity;ATP binding;protein kinase activity;nucleotide binding;protein serine/threonine kinase activity;transferase activity;kinase activity;protein t…	GO:0005737;GO:0005737;GO:0016020;GO:0005886;GO:0030054;GO:0016323;GO:0016323;GO:0005829;GO:0016324;GO:0016324;GO:0005737;GO:0005737;GO:0016020;GO:0005886;GO:0030054;GO:0016323;GO:0016323;GO:0005829;GO:0016324;GO:0016324;GO:0005737;GO:0005737;GO:0016020;GO:0005886;GO:0030054;GO:0016323;GO:0016323;GO:0005829;GO:0016324;GO:0016324	cytoplasm;cytoplasm;membrane;plasma membrane;cell junction;basolateral plasma membrane;basolateral plasma membrane;cytosol;apical plasma membrane;apical plasma membrane;cytoplasm;cytoplasm;membrane;plasma membrane;cell junction;basolateral plasma membrane;basolateral plasma membrane;cytosol;apical plasma membrane;apical plasma membrane;cytoplasm;cytoplasm;membrane;plasma membrane;cell junction;ba…
HLX	0.307147	-1.703	1.07514e-09	4.77854e-08	HLX	GO:0006355;GO:0006351;GO:0030154;GO:0006357;GO:0007275;GO:0001889;GO:0007519;GO:0008284;GO:0045627;GO:0045629;GO:0046622;GO:0048484;GO:0048513;GO:0048557;GO:0006355	regulation of transcription, DNA-templated;transcription, DNA-templated;cell differentiation;regulation of transcription from RNA polymerase II promoter;multicellular organism development;liver development;skeletal muscle tissue development;positive regulation of cell proliferation;positive regulation of T-helper 1 cell differentiation;negative regulation of T-helper 2 cell differentiation;positi…	GO:0003677;GO:0043565;GO:0005515;GO:0000981;GO:0000981;GO:0043565;GO:0003677;GO:0043565	DNA binding;sequence-specific DNA binding;protein binding;RNA polymerase II transcription factor activity, sequence-specific DNA binding;RNA polymerase II transcription factor activity, sequence-specific DNA binding;sequence-specific DNA binding;DNA binding;sequence-specific DNA binding	GO:0005634;GO:0005634	nucleus;nucleus
ANXA10	0.248273	-2.01	1.07224e-09	4.77854e-08	ANXA10	NA	NA	GO:0005509;GO:0005544;GO:0005515;GO:0005509	calcium ion binding;calcium-dependent phospholipid binding;protein binding;calcium ion binding	GO:0005739	mitochondrion
MSX1	0.408102	-1.293	1.15576e-09	5.1189e-08	MSX1	GO:0006355;GO:0006366;GO:0006351;GO:0007275;GO:0050821;GO:0034504;GO:0030308;GO:0000902;GO:0060325;GO:0000122;GO:0001701;GO:0001837;GO:0003007;GO:0003198;GO:0007507;GO:0007517;GO:0008285;GO:0009952;GO:0010463;GO:0021983;GO:0023019;GO:0030326;GO:0030509;GO:0030513;GO:0030900;GO:0030901;GO:0035115;GO:0035116;GO:0035880;GO:0035880;GO:0042474;GO:0042475;GO:0042475;GO:0042476;GO:0042481;GO:0042733;GO:…	regulation of transcription, DNA-templated;transcription from RNA polymerase II promoter;transcription, DNA-templated;multicellular organism development;protein stabilization;protein localization to nucleus;negative regulation of cell growth;cell morphogenesis;face morphogenesis;negative regulation of transcription from RNA polymerase II promoter;in utero embryonic development;epithelial to mesen…	GO:0003677;GO:0043565;GO:0000981;GO:0000981;GO:0002039;GO:0000977;GO:0000982;GO:0001227;GO:0001228;GO:0035326	DNA binding;sequence-specific DNA binding;RNA polymerase II transcription factor activity, sequence-specific DNA binding;RNA polymerase II transcription factor activity, sequence-specific DNA binding;p53 binding;RNA polymerase II regulatory region sequence-specific DNA binding;transcription factor activity, RNA polymerase II proximal promoter sequence-specific DNA binding;transcriptional represso…	GO:0005634;GO:0005654;GO:0005634	nucleus;nucleoplasm;nucleus
[truncated: 1,349 more rows]
