# Supplementary figures and images for: Identification of a Dexamethasone Mediated Radioprotection Mechanism Reveals New Therapeutic Vulnerabilities in Glioblastoma
Source: MDPI journal article supplement (doi:10.3390/cancers13020361), 2021-01-19

**Supplementary Material – Uncropped Western blots**

Figure 3C

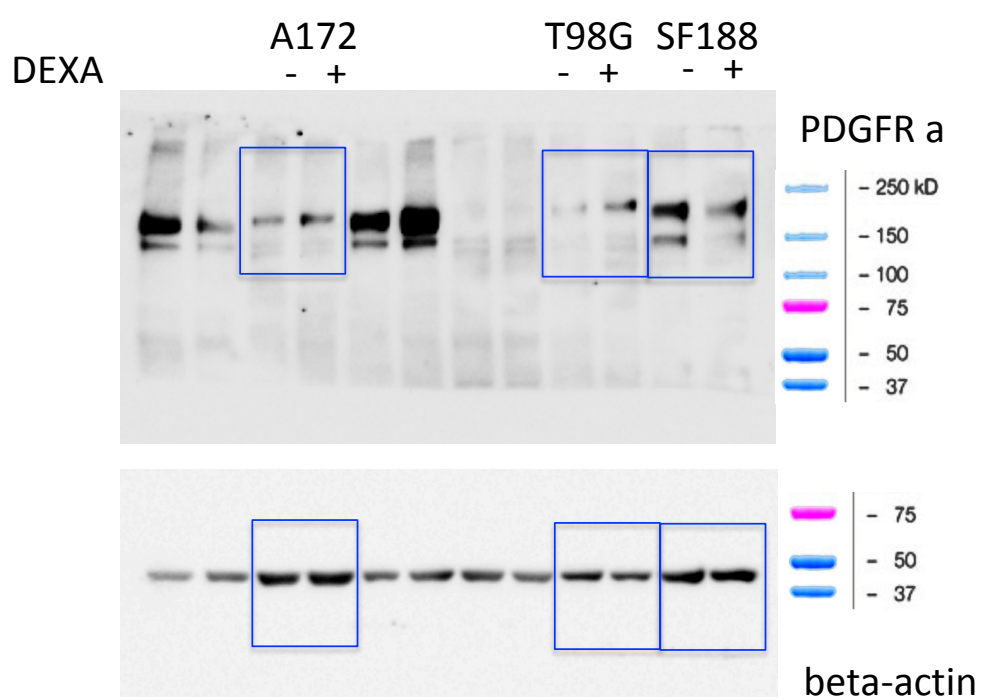

Figure 3C

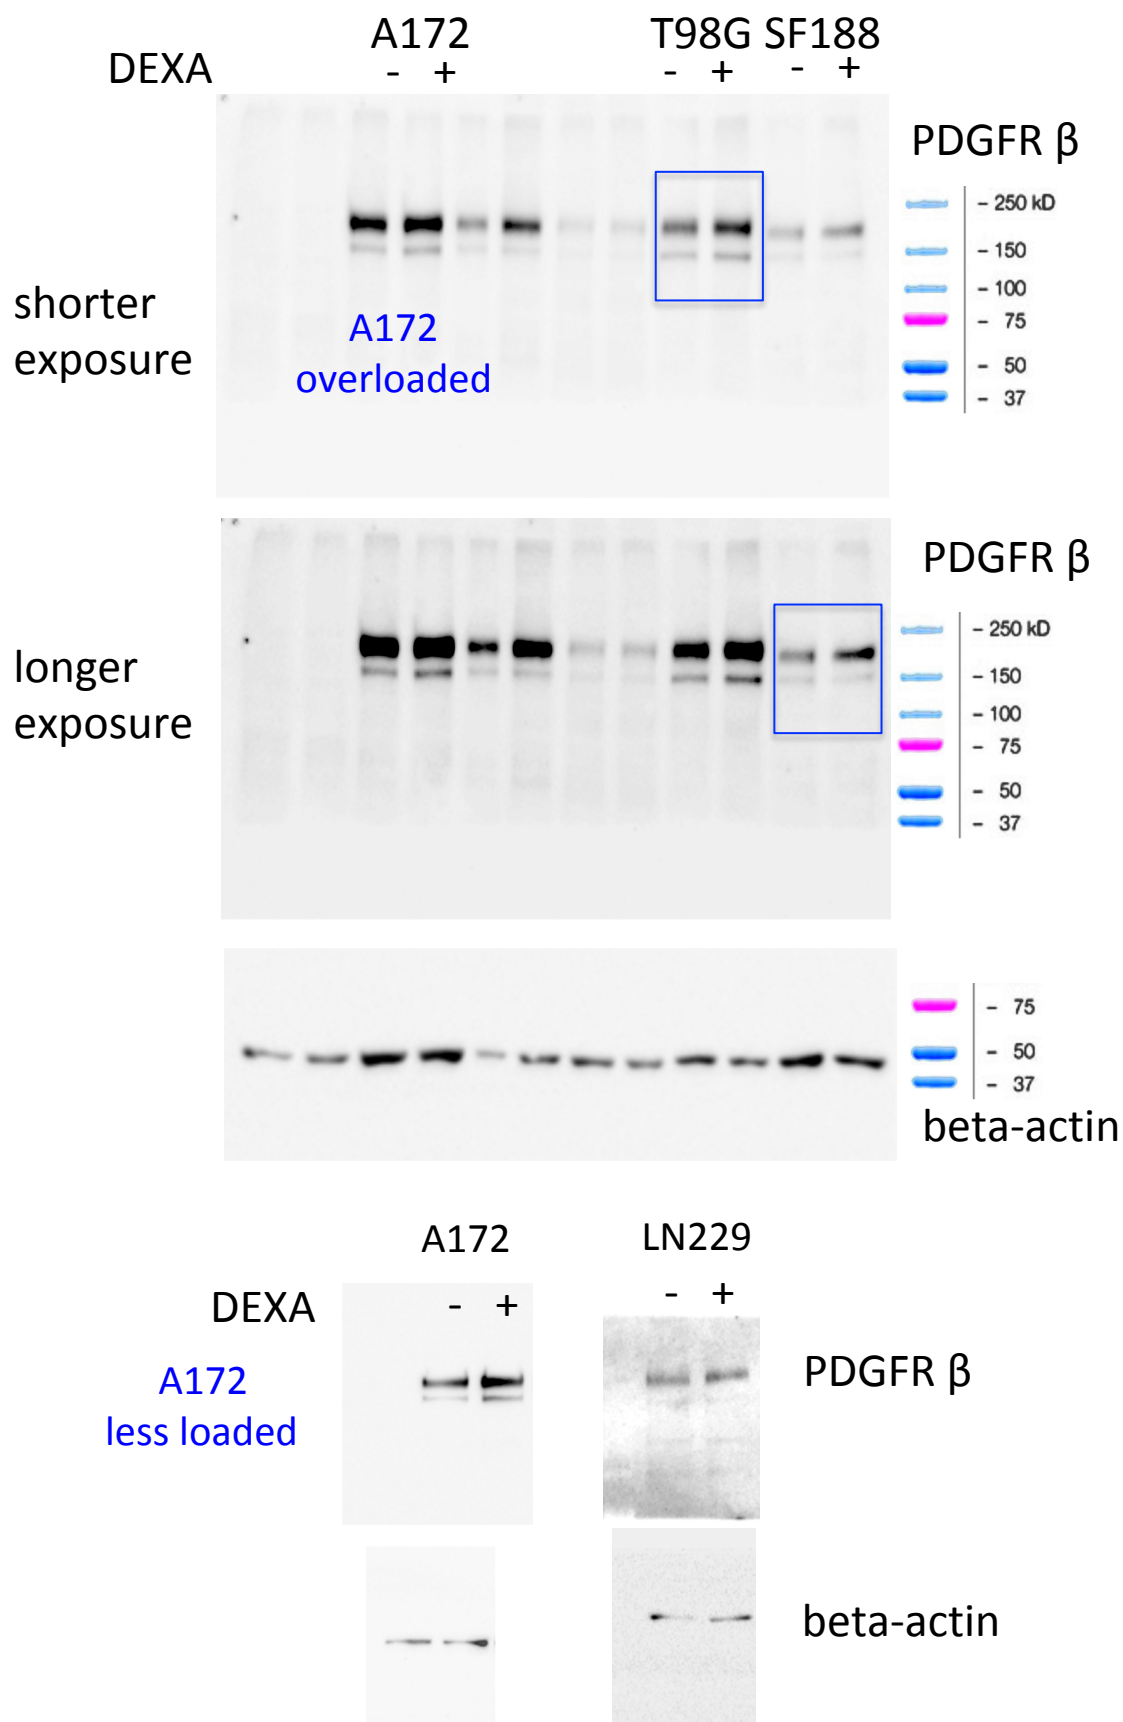

Figure 3D

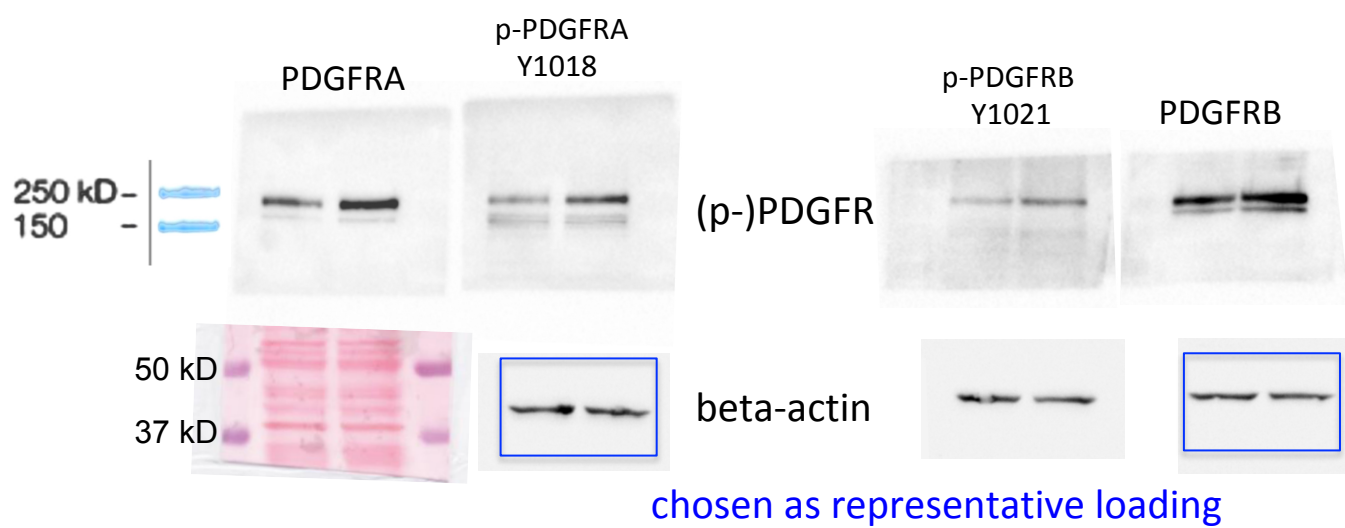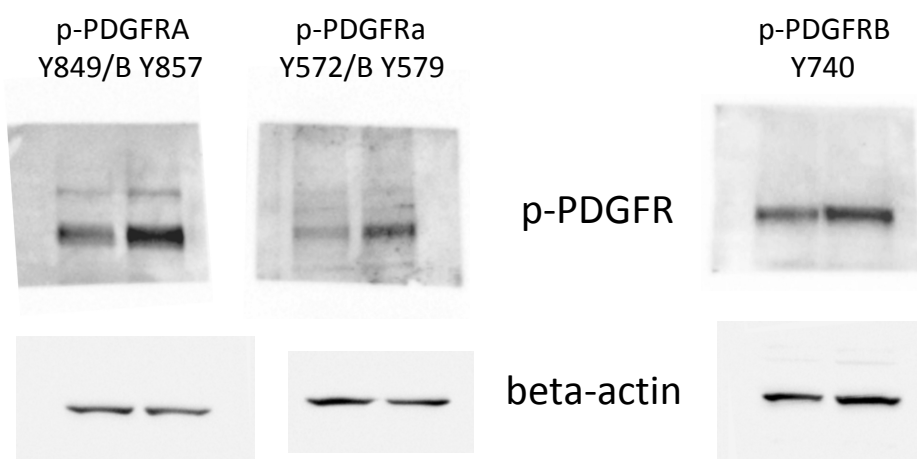

Figure 3E

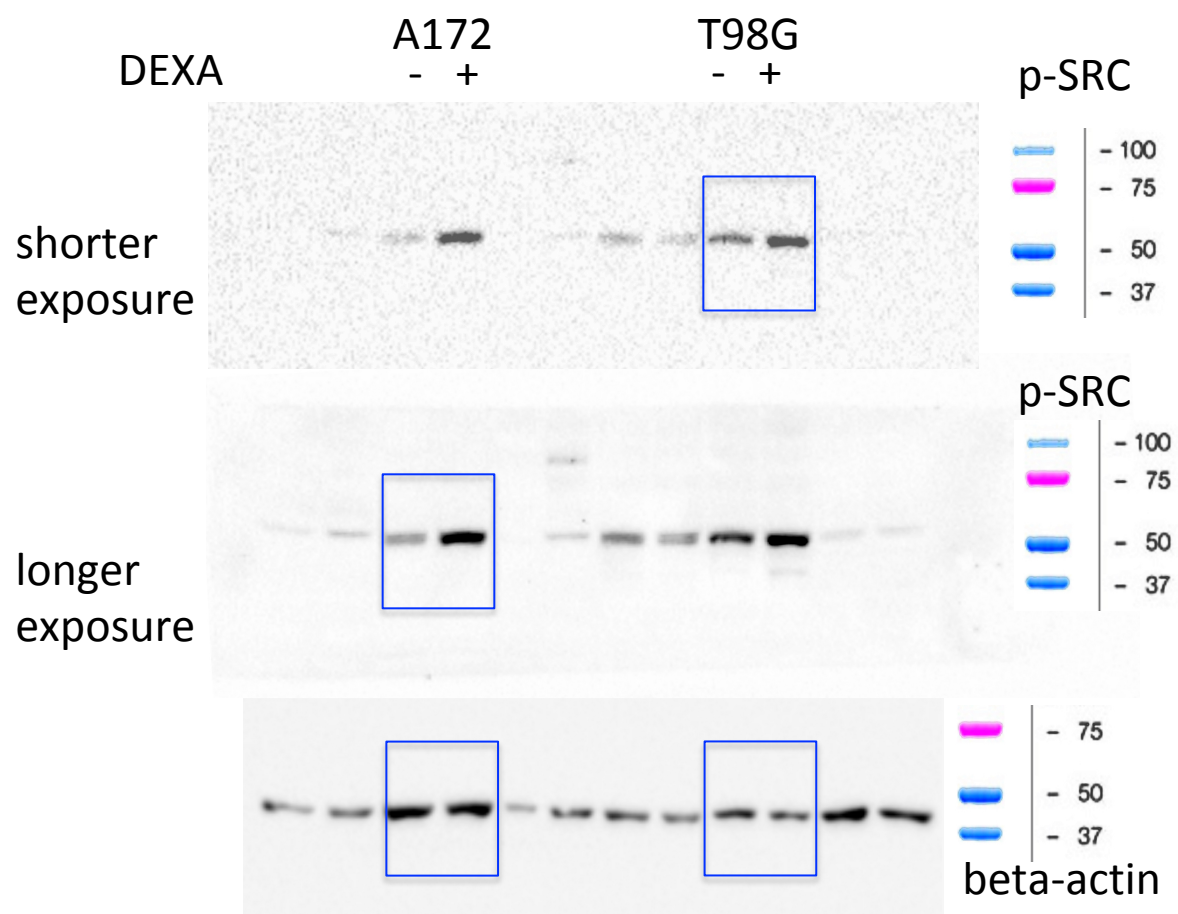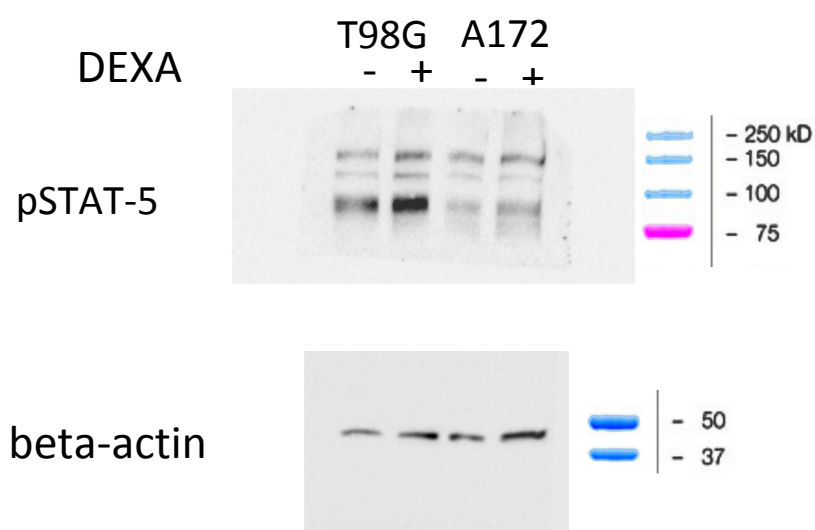

Supplement: s1 [file SUPPL MATERIAL uncropped blots.pdf › cancers-1091321-supplementary/cancers-1091321_supplementary_conversion/SUPPL MATERIAL uncropped blots.pdf]
